# Supplementary material for: MHC class I and MHC class II reporter mice enable analysis of immune oligodendroglia in mouse models of multiple sclerosis
Source: eLife journal article supplement (doi:10.7554/elife.82938), 2023-04-14

## B2m<sup>tdT</sup> spleen baseline

### T cells (singlet/cells/viable/CD45+CD3+)

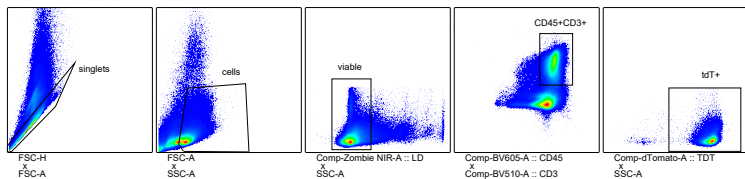

## Cd74<sup>tdT</sup> spleen baseline

### myeloid cells (singlet/cells/viable/CD45+/Ly6G-/CD11b+)

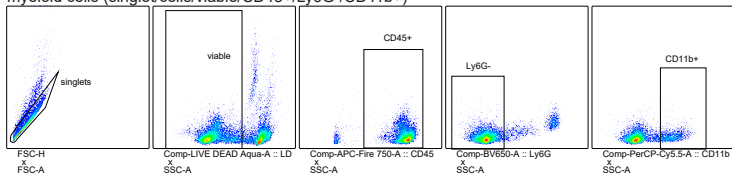

### B cells (singlet/cells/viable/CD45+/Ly6G-/CD19+)

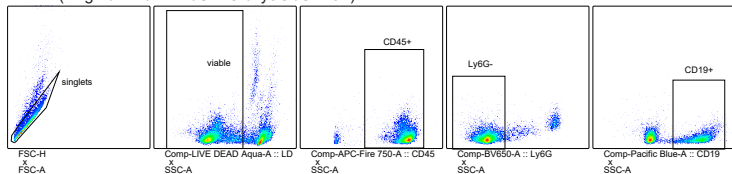

### dendritic cells (singlet/cells/viable/CD45+/Ly6G-/CD11b-/CD11c+)

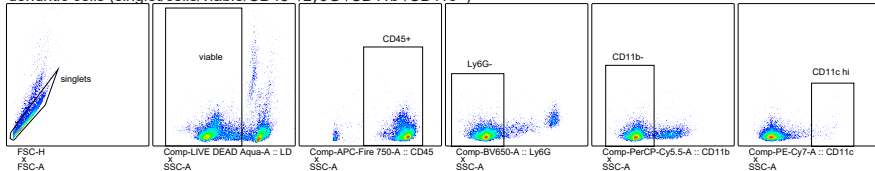

Supplement: fig1-data3 [file elife-82938-fig1-data3-v2.pdf]
