# Supplementary material for: MHC class I and MHC class II reporter mice enable analysis of immune oligodendroglia in mouse models of multiple sclerosis
Source: eLife journal article supplement (doi:10.7554/elife.82938), 2023-04-14

## Spinal cord EAE

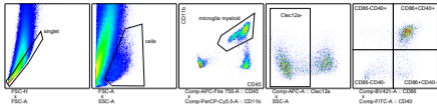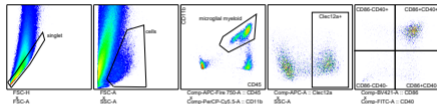

## Brain EAE

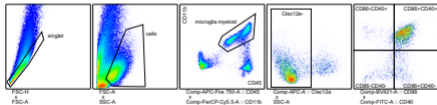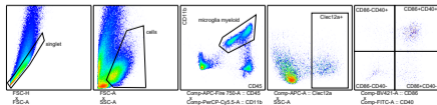

Supplement: fig6-data2 [file elife-82938-fig6-data2-v2.pdf]
