# Supplementary material for: MHC class I and MHC class II reporter mice enable analysis of immune oligodendroglia in mouse models of multiple sclerosis
Source: eLife. 2023 Apr 14;12:e82938. doi: 10.7554/eLife.82938 (PMC10181822; doi:10.7554/eLife.82938)
Supplement: Figure 1—figure supplement 1—source data 2. — Sheets are labeled with letter corresponding to data panels in Figure 1—figure supplement 1. [file elife-82938-fig1-figsupp1-data2.xlsx]

## Sheet: Panel C
Panel C- intensity of Cd74 bands
	Cd74tdT	WT
	1051313	1077981
	819834	821402
	998051	884377
	980252	884553
		948898
	Cd74tdT
	Mean	SEM	N
	962362	49850	4
	WT
	Mean	SEM	N
	923442	43578	5
Column B	WT
vs.	vs.
Column A	Cd74tdT
Unpaired t test
P value	0.574
P value summary	ns
Significantly different (P < 0.05)?	No
One- or two-tailed P value?	Two-tailed
t, df	t=0.5895, df=7
How big is the difference?
Mean of column A	962363
Mean of column B	923442
Difference between means (B - A) ¬± SEM	-38920 ¬± 66020
95% confidence interval	-195033 to 117192
R squared (eta squared)	0.0473
F test to compare variances
F, DFn, Dfd	1.047, 3, 4
P value	0.9264
P value summary	ns
Significantly different (P < 0.05)?	No
Data analyzed
Sample size, column A	4
Sample size, column B	5

## Sheet: Panel D
Panel D- % of fusion protein- 90kDa band intensity of total CD74 band intensities (Cd74 Ab)
Cd7tdT
22.82
25.5
21.44
23.21
Mean	SEM	N
23.2425	0.842856	4

## Sheet: Panel G
Panel G- % of fusion protein- 90kDa band intensity of total CD74 band intensities (tdT Ab)
Cd74tdT
13.05
15.88
10.72
10.67
Mean	SEM	N
12.58	1.23216	4

## Sheet: Panel J
Panel J- intensity of B2m band
	B2mtdT	WT
	615135	642585
	1011743	870031
	573138	792853
	683105	998484
	B2mtdT
	Mean	SEM	N
	720780	99598.3	4
	WT
	Mean	SEM	N
	825988	74402.8	4
Column B	WT
vs.	vs.
Column A	B2mtdT
Unpaired t test
P value	0.4299
P value summary	ns
Significantly different (P < 0.05)?	No
One- or two-tailed P value?	Two-tailed
t, df	t=0.8463, df=6
How big is the difference?
Mean of column A	720780
Mean of column B	825988
Difference between means (B - A) ¬± SEM	105208 ¬± 124321
95% confidence interval	-198993 to 409409
R squared (eta squared)	0.1066
F test to compare variances
F, DFn, Dfd	1.792, 3, 3
P value	0.6437
P value summary	ns
Significantly different (P < 0.05)?	No
Data analyzed
Sample size, column A	4
Sample size, column B	4
