# Supplementary material for: MHC class I and MHC class II reporter mice enable analysis of immune oligodendroglia in mouse models of multiple sclerosis
Source: eLife. 2023 Apr 14;12:e82938. doi: 10.7554/eLife.82938 (PMC10181822; doi:10.7554/eLife.82938)
Supplement: Figure 1—figure supplement 2—source data 1. [file elife-82938-fig1-figsupp2-data1.xlsx]

## Sheet: Panel A
Panel A- % proliferating OT-II T cells
	WT splenocytes	Cd74tdT splenocytes
	99.6	96.1
	99.8	99
	99.4	98.7
	95.4	98.8
	96.9	87.8
	95.1	93.8
	96.5	91.8
		95.2
Column B	Cd74tdT splenocytes
vs.	vs.
Column A	WT splenocytes
Unpaired t test
P value	0.1752
P value summary	ns
Significantly different (P < 0.05)?	No
One- or two-tailed P value?	Two-tailed
t, df	t=1.434, df=13
How big is the difference?
Mean of column A	97.53
Mean of column B	95.15
Difference between means (B - A) ± SEM	-2.379 ± 1.659
95% confidence interval	-5.962 to 1.205
R squared (eta squared)	0.1366
F test to compare variances
F, DFn, Dfd	3.752, 7, 6
P value	0.128
P value summary	ns
Significantly different (P < 0.05)?	No
Data analyzed
Sample size, column A	7
Sample size, column B	8

## Sheet: Panel B
Panel B- %CD44 OT-II T cells
	WT splenocytes	Cd74tdT splenocytes
	98.2	97.2
	98.2	98.4
	99	98.1
	95.6	97.7
	95.8	90.8
	94.9	95.3
	96.2	93.9
		96
Column B	Cd74tdT splenocytes
vs.	vs.
Column A	WT splenocytes
Unpaired t test
P value	0.4297
P value summary	ns
Significantly different (P < 0.05)?	No
One- or two-tailed P value?	Two-tailed
t, df	t=0.8150, df=13
How big is the difference?
Mean of column A	96.84
Mean of column B	95.93
Difference between means (B - A) ± SEM	-0.9179 ± 1.126
95% confidence interval	-3.351 to 1.515
R squared (eta squared)	0.04861
F test to compare variances
F, DFn, Dfd	2.624, 7, 6
P value	0.2605
P value summary	ns
Significantly different (P < 0.05)?	No
Data analyzed
Sample size, column A	7
Sample size, column B	8
