# Supplementary material for: MHC class I and MHC class II reporter mice enable analysis of immune oligodendroglia in mouse models of multiple sclerosis
Source: eLife. 2023 Apr 14;12:e82938. doi: 10.7554/eLife.82938 (PMC10181822; doi:10.7554/eLife.82938)
Supplement: Figure 1—source data 1. — Cd74-P2A-TdTomato-WPRE-pA and B2m-P2A-TdTomato-WPRE-pA construct sequences with 500 bp homology arms (uppercase sequence) used for generating reporter animals. Primers for genotyping B2mtdT and Cd74tdT reporter animals. [file elife-82938-fig1-data1.xlsx]

## Sheet: B2m-P2A-TdT-WPRE-pA construct
Construct Name: B2M-P2A-TdTomato-WPRE-pA_500bp HA_pUC57
Gene name: B2M-P2A-TdTomato-WPRE-pA_500bp HA
Length:3351bp
Sequence:
CTCAAGTTCTTCCTTACTTTCTGGACGCTCCATCTGTGTGGACTTAAAACTGCTTTGCTATTTTAAAAACCTGCATACTGAGATTGTTAGAGAATACCCCCAAAAGACTGATCTGTGGTGCCAGCAGAGACTTACACAGCAGGCCAGGAACCAGCAGTTCCCTACCCACTGTCCCAGACTGCTTCCCTCTTTCCTGAGCTTCCTCCAGCTTTCCTGGCAGCCTGGTGCATACTAAGTGTCAAAGGGCATGCCAGGTAGGACAGGCCTTGGTCTGTAACCCCTGCCTTCAGGTACCTACAATTCTGGACTGTTCCAGGGCCTTGGCAAGAAGCTAGTAGACAGGAGTGGATCTCTGGAAAGTTCTCAACAAGTACTCAAGGCTAGCAACAGCAACCTAGT…

## Sheet: CD74-P2A-TdT-WPRE-pA construct
Construct Name: CD74-P2A-TdTomato-WPRE-pA_500bp HA_pUC57
Gene name: CD74-P2A-TdTomato-WPRE-pA_500bp HA
Length:3351bp
Sequence:
TGTGTCCTTCTAATCTTTGTCTCTTCTTCTCCGCACGCTGTCCTGCACTGGAGTCCCACAGACCCACCAGTCTCACTGTATCCCCAACCACACTGTATGCTCTGGTGCCTCCTTTGCCAAGTTCAAGGCACAGTGGCAACAgtgtgtgtgtgtgtgtgtTGGGGTAAGAATAACAGTGAGCCTGATGCTTCCCTTGCAGAGCCACTGGACATGGAAGACCTATCTTCTGGCCTGGGAGTGACCAGGCAGGAACTGGGTCAAGGTAAGGGGGGGATCACAGAGGGGGCCACCCACATGCAGACTCTGGTGACACTGGGACATTCATCACTATCACTGGGATGGTTTTTCTAGAATGGGATGGTGGCTGGGAGCACAGTACTACCTGAGCTTAGCAGGGGG…

## Sheet: Genotyping primers
Genotyping primers for B2M-TdT and CD74-TdT
B2mtdT
1. Out-L-F
GAGCCCAAGACCGTCTACTG
2. In-L-F
CCCCTGGATGTCTGTTAATATG
3. TdT-R
gaactcgtggccgttcat
4. In-R-R
AACAATTCtcttcctgcagtgct
5. WPRE-F
GGACGTCCTTCTGCTACGTC
6. Out-R-R
GGCTAAGATGTACCCGCAGA
Out+TdT: 669 bp
WPRE+Out: 931 bp
In+In: 2554 bp vs. 215 bp
Cd74tdT
1. Out-L-F
CCCTTTCTCCACACAGGAAC
2. In-L-F
TGCTTCTCTTCCCAGTCACC
3. TdT-R (B2M same)
gaactcgtggccgttcat
4. In-R-R
GACTTCATTTGCCGTGTCCT
5. WPRE-F (B2M same)
GGACGTCCTTCTGCTACGTC
6. Out-R-R
CGGCCTTGGGGTAAACTAAC
Out+TdT: 665 bp
WPRE+Out: 934 bp
In+In: 2540 bp vs. 201 bp
