# Supplementary material for: MHC class I and MHC class II reporter mice enable analysis of immune oligodendroglia in mouse models of multiple sclerosis
Source: eLife. 2023 Apr 14;12:e82938. doi: 10.7554/eLife.82938 (PMC10181822; doi:10.7554/eLife.82938)
Supplement: Figure 1—source data 2. [file elife-82938-fig1-data2.xlsx]

## Sheet: Panel D
Panel D- %tdT+ in spleen
baseline
T cell	99.6	99.9	99.8
monocyte	99.5	99.8	99.6
dendritic cell	99.7	99.7	99.8
B cell	99.8	99.8	99.5
	Mean	SEM	N
T cell	99.7667	0.0881917	3
monocyte	99.6333	0.0881917	3
debdritic cell	99.7333	0.0333333	3
B cell	99.7	0.1	3

## Sheet: Panel E
Panel E- %B2m of tdT+ in spleen
baseline
T cell
100
99.9
100
100
	Mean	SEM	N
T cell	99.975	0.025	4

## Sheet: Panel F
Panel F- %tDT in spleen
baseline
monocyte	19.6	22.1	22.2
dendritic cell	64.8	61.1	65.6
B cell	88.5	86.3	86.2
	Mean	SEM	N
monocyte	21.3	0.85049	3
dendritic cell	63.8333	1.38604	3
B cell	87	0.750555	3

## Sheet: Panel G
Panel G- %Cd74+ of tdT+ in spleen
baseline
monocyte	87.1	92.3	91
dendritic cell	93.8	95	95.5
B cell	99.9	99.9	99.9
	Mean	SEM	N
monocyte	90.1333	1.56241	3
dendritic cell	94.7667	0.504425	3
B cell	99.9	0	3

## Sheet: Panel H
Panel H- % IA/IE+ of tdT+ in spleen
baseline
monocyte	65.7	71.6	73.7
dendritic cell	91.5	91.3	91
B cell	97.3	98.7	98.4
	Mean	SEM	N
monocyte	70.3333	2.39467	3
dendritic cell	91.2667	0.145297	3
B cell	98.1333	0.425572	3
