# Supplementary material for: MHC class I and MHC class II reporter mice enable analysis of immune oligodendroglia in mouse models of multiple sclerosis
Source: eLife. 2023 Apr 14;12:e82938. doi: 10.7554/eLife.82938 (PMC10181822; doi:10.7554/eLife.82938)
Supplement: Figure 6—source data 1. [file elife-82938-fig6-data1.xlsx]

## Sheet: Panel A- myeloid
Panel A- %TdT myeloid
	EAE brain	EAE brain		EAE spinal cord	EAE spinal cord
	CD40-CD86-	CD40+CD86+		CD40-CD86-	CD40+CD86+
	54.7	99		78.2	97.8
	44.8	99.2		79.1	99.2
	46.7	97.3		74.3	97.7
EAE brain
	Mean	SEM	N
CD40-CD86-	48.7333	3.03333	3
CD40+CD86+	98.5	0.602771	3
EAE spinal cord
	Mean	SEM	N
CD40-CD86-	77.2	1.47309	3
CD40+CD86+	98.2333	0.484195	3
Column B	EAE brain CD40+CD86+
vs.	vs.
Column A	EAE brain CD40-CD86-
Unpaired t test
P value	<0.0001
P value summary	****
Significantly different (P < 0.05)?	Yes
One- or two-tailed P value?	Two-tailed
t, df	t=16.09, df=4
How big is the difference?
Mean of column A	48.73
Mean of column B	98.5
Difference between means (B - A) ¬± SEM	49.77 ¬± 3.093
95% confidence interval	41.18 to 58.35
R squared (eta squared)	0.9848
F test to compare variances
F, DFn, Dfd	25.32, 2, 2
P value	0.076
P value summary	ns
Significantly different (P < 0.05)?	No
Data analyzed
Sample size, column A	3
Sample size, column B	3
Column B	EAE spinal cord CD40+CD86+
vs.	vs.
Column A	EAE spinal cord CD40-CD86-
Unpaired t test
P value	0.0002
P value summary	***
Significantly different (P < 0.05)?	Yes
One- or two-tailed P value?	Two-tailed
t, df	t=13.56, df=4
How big is the difference?
Mean of column A	77.2
Mean of column B	98.23
Difference between means (B - A) ¬± SEM	21.03 ¬± 1.551
95% confidence interval	16.73 to 25.34
R squared (eta squared)	0.9787
F test to compare variances
F, DFn, Dfd	9.256, 2, 2
P value	0.195
P value summary	ns
Significantly different (P < 0.05)?	No
Data analyzed
Sample size, column A	3
Sample size, column B	3

## Sheet: Panel A- microglia
Panel A- %TdT microglia
	EAE brain	EAE brain		EAE spinal cord	EAE spinal cord
	CD40-CD86-	CD40+CD86+		CD40-CD86-	CD40+CD86+
	82.6	99.1		74.7	97.5
	77	98.7		81.5	99
	63.6	95.5		69.6	97.6
EAE brain
	Mean	SEM	N
CD40-CD86-	74.4	5.63678	3
CD40+CD86+	97.7667	1.1392	3
EAE spinal cord
	Mean	SEM	N
CD40-CD86-	75.2667	3.4469	3
CD40+CD86+	98.0333	0.484195	3
Column B	EAE brain CD40+CD86+
vs.	vs.
Column A	EAE brain cCD40-CD86-
Unpaired t test
P value	0.0153
P value summary	*
Significantly different (P < 0.05)?	Yes
One- or two-tailed P value?	Two-tailed
t, df	t=4.063, df=4
How big is the difference?
Mean of column A	74.4
Mean of column B	97.77
Difference between means (B - A) ¬± SEM	23.37 ¬± 5.751
95% confidence interval	7.400 to 39.33
R squared (eta squared)	0.805
F test to compare variances
F, DFn, Dfd	24.48, 2, 2
P value	0.0785
P value summary	ns
Significantly different (P < 0.05)?	No
Data analyzed
Sample size, column A	3
Sample size, column B	3
Column B	EAE sc CD40+CD86+
vs.	vs.
Column A	EAE sc CD40-CD86-
Unpaired t test
P value	0.0028
P value summary	**
Significantly different (P < 0.05)?	Yes
One- or two-tailed P value?	Two-tailed
t, df	t=6.541, df=4
How big is the difference?
Mean of column A	75.27
Mean of column B	98.03
Difference between means (B - A) ¬± SEM	22.77 ¬± 3.481
95% confidence interval	13.10 to 32.43
R squared (eta squared)	0.9145
F test to compare variances
F, DFn, Dfd	50.68, 2, 2
P value	0.0387
P value summary	*
Significantly different (P < 0.05)?	Yes
Data analyzed
Sample size, column A	3
Sample size, column B	3

## Sheet: Panel B- myeloid
Panel D- TdT MFI myeloid
	EAE brain	EAE brain		EAE spinal cord	EAE spinal cord
	CD40-CD86-	CD40+CD86+		CD40-CD86-	CD40+CD86+
	8787	303894		9629	122963
	9864	381623		10611	153283
	9652	428000		9088	117216
EAE brain
	Mean	SEM	N
CD40-CD86-	40587.3	12577.9	3
CD40+CD86+	83195.3	27162.7	3
EAE spinal cord
	Mean	SEM	N
CD40-CD86-	17058.7	3971.25	3
CD40+CD86+	124538	20147.1	3
Column B	EAE brain CD40+CD86+
vs.	vs.
Column A	EAE brain CD40-CD86-
Unpaired t test
P value	0.0006
P value summary	***
Significantly different (P < 0.05)?	Yes
One- or two-tailed P value?	Two-tailed
t, df	t=9.991, df=4
How big is the difference?
Mean of column A	9434
Mean of column B	371172
Difference between means (B - A) ¬± SEM	361738 ¬± 36207
95% confidence interval	261212 to 462264
R squared (eta squared)	0.9615
F test to compare variances
F, DFn, Dfd	12081, 2, 2
P value	0.0002
P value summary	***
Significantly different (P < 0.05)?	Yes
Data analyzed
Sample size, column A	3
Sample size, column B	3
Column B	EAE spinal cord CD40+CD86+
vs.	vs.
Column A	EAE spinal cord CD40-CD86-
Unpaired t test
P value	0.0004
P value summary	***
Significantly different (P < 0.05)?	Yes
One- or two-tailed P value?	Two-tailed
t, df	t=10.84, df=4
How big is the difference?
Mean of column A	9776
Mean of column B	131154
Difference between means (B - A) ¬± SEM	121378 ¬± 11197
95% confidence interval	90290 to 152466
R squared (eta squared)	0.9671
F test to compare variances
F, DFn, Dfd	630.0, 2, 2
P value	0.0032
P value summary	**
Significantly different (P < 0.05)?	Yes
Data analyzed
Sample size, column A	3
Sample size, column B	3

## Sheet: Panel B- microglia
Panel B- TdT MFI microglia
	EAE brain	EAE brain		EAE spinal cord	EAE spinal cord
	CD40-CD86-	CD40+CD86+		CD40-CD86-	CD40+CD86+
	54986	120877		13474	90013
	51252	98244		24989	159793
	15524	30465		12713	123808
EAE brain
	Mean	SEM	N
CD40-CD86-	9434.33	329.402	3
CD40+CD86+	371172	36205.4	3
EAE spinal cord
	Mean	SEM	N
CD40-CD86-	9776	445.754	3
CD40+CD86+	131154	11188.2	3
Column B	EAE brain CD40+CD86+
vs.	vs.
Column A	EAE brain CD40-CD86-
Unpaired t test
P value	0.2277
P value summary	ns
Significantly different (P < 0.05)?	No
One- or two-tailed P value?	Two-tailed
t, df	t=1.423, df=4
How big is the difference?
Mean of column A	40587
Mean of column B	83195
Difference between means (B - A) ¬± SEM	42608 ¬± 29933
95% confidence interval	-40501 to 125717
R squared (eta squared)	0.3362
F test to compare variances
F, DFn, Dfd	4.664, 2, 2
P value	0.3531
P value summary	ns
Significantly different (P < 0.05)?	No
Data analyzed
Sample size, column A	3
Sample size, column B	3
Column B	EAE sc CD40+CD86+
vs.	vs.
Column A	EAE sc CD40-CD86-
Unpaired t test
P value	0.0064
P value summary	**
Significantly different (P < 0.05)?	Yes
One- or two-tailed P value?	Two-tailed
t, df	t=5.234, df=4
How big is the difference?
Mean of column A	17059
Mean of column B	124538
Difference between means (B - A) ¬± SEM	107479 ¬± 20535
95% confidence interval	50466 to 164493
R squared (eta squared)	0.8726
F test to compare variances
F, DFn, Dfd	25.74, 2, 2
P value	0.0748
P value summary	ns
Significantly different (P < 0.05)?	No
Data analyzed
Sample size, column A	3
Sample size, column B	3

## Sheet: Panel D
Panel D- TdT% microglia
M2 microglia (CD86-CD206+)
brain baseline	brain EAE
97.9	97.2
97.4	100
99.4	98.4
M1 microglia (CD86+CD206-)
brain baseline	brain EAE
97.8	99.4
97	100
93.7	99
M1-M2 microglia (CD86+CD206+)
brain baseline	brain EAE
99.8	99.6
99.7	100
98.6	99.8
M2 microglia (CD86-CD206+)
	Mean	SEM	N
brain baseline	98.2333	0.600925	3
brain EAE	98.5333	0.811035	3
M1 microglia (CD86+CD206-)
	Mean	SEM	N
brain baseline	96.1667	1.25477	3
brain EAE	99.4667	0.290593	3
M1-M2 microglia (CD86+CD206+)
	Mean	SEM	N
brain baseline	99.3667	0.384419	3
brain EAE	99.8	0.11547	3

## Sheet: Panel E
Panel E- TdT MFI microglia
	M2 microglia (CD86-CD206+)
	brain baseline	brain EAE
	206861	117617
	227439	277141
	208317	275186
	M1 microglia (CD86+CD206-)
	brain baseline	brain EAE
	257307	542000
	265622	673000
	234760	562000
	M1-M2 microglia (CD86+CD206+)
	brain baseline	brain EAE
	244902	665000
	269406	780000
	238092	628000
	M2 microglia (CD86-CD206+)
		Mean	SEM	N
	brain baseline	214206	6630	3
	brain EAE	223315	52851.8	3
	M1 microglia (CD86+CD206-)
		Mean	SEM	N
	brain baseline	252563	9219.45	3
	brain EAE	592333	40744.5	3
	M1-M2 microglia (CD86+CD206+)
		Mean	SEM	N
	brain baseline	250800	9508.44	3
	brain EAE	691000	45763.9	3
Column B	M2 brain EAE
vs.	vs.
Column A	M1 brain EAE
Unpaired t test
P value	0.0052
P value summary	**
Significantly different (P < 0.05)?	Yes
One- or two-tailed P value?	Two-tailed
t, df	t=5.530, df=4
How big is the difference?
Mean of column A	592333
Mean of column B	223315
Difference between means (B - A) ¬± SEM	-369019 ¬± 66734
95% confidence interval	-554302 to -183735
R squared (eta squared)	0.8843
F test to compare variances
F, DFn, Dfd	1.683, 2, 2
P value	0.7455
P value summary	ns
Significantly different (P < 0.05)?	No
Data analyzed
Sample size, column A	3
Sample size, column B	3
Column B	M1M2 brain EAE
vs.	vs.
Column A	M1 brain EAE
Unpaired t test
P value	0.1826
P value summary	ns
Significantly different (P < 0.05)?	No
One- or two-tailed P value?	Two-tailed
t, df	t=1.610, df=4
How big is the difference?
Mean of column A	592333
Mean of column B	691000
Difference between means (B - A) ¬± SEM	98667 ¬± 61274
95% confidence interval	-71456 to 268789
R squared (eta squared)	0.3933
F test to compare variances
F, DFn, Dfd	1.262, 2, 2
P value	0.8843
P value summary	ns
Significantly different (P < 0.05)?	No
Data analyzed
Sample size, column A	3
Sample size, column B	3
