# Supplementary material for: MHC class I and MHC class II reporter mice enable analysis of immune oligodendroglia in mouse models of multiple sclerosis
Source: eLife. 2023 Apr 14;12:e82938. doi: 10.7554/eLife.82938 (PMC10181822; doi:10.7554/eLife.82938)
Supplement: Figure 7—figure supplement 1—source data 1. [file elife-82938-fig7-figsupp1-data1.xlsx]

## Sheet: Panel A
Panel A- % tdT+Olig2+ of Olig2+ vs EAE score
B2mtdT Spinal Cord			Cd74tdT Spinal Cord
EAE score	%tdT+Olig2+ of Olig2+		EAE score	%tdT+Olig2+ of Olig2+
0	0.34		0	0.02
0	1.04		0	0
0	1.46		0	0.03
0	1.05		2.5	0.47
1.5	1.19		2.5	1.38
3.5	1.67		3	0.31
2	3.49		3	0.67
2	4.26		3	1.35
2.5	4.49		3.5	1.14
3	3.95		3	0.15
3	9.66		2.5	0.26
3	16.81		2	0.18
3.5	11.84		1.5	0.05
Linear Regression			Linear Regression
Best-fit values			Best-fit values
Slope	2.278		Slope	0.2542
Y-intercept	0.5055		Y-intercept	-0.05591
X-intercept	-0.2219		X-intercept	0.2199
1/slope	0.4389		1/slope	3.934
Std. Error			Std. Error
Slope	0.8293		Slope	0.09471
Y-intercept	1.897		Y-intercept	0.2248
95% Confidence Intervals			95% Confidence Intervals
Slope	0.4530 to 4.104		Slope	0.04577 to 0.4627
Y-intercept	-3.669 to 4.680		Y-intercept	-0.5507 to 0.4389
X-intercept	-8.896 to 1.039		X-intercept	-8.384 to 1.361
Goodness of Fit			Goodness of Fit
R squared	0.4069		R squared	0.3958
Sy.x	4.037		Sy.x	0.4153
Is slope significantly non-zero?			Is slope significantly non-zero?
F	7.547		F	7.205
DFn, DFd	1, 11		DFn, DFd	1, 11
P value	0.019		P value	0.0212
Deviation from zero?	Significant		Deviation from zero?	Significant
Equation	Y = 2.278*X + 0.5055		Equation	Y = 0.2542*X - 0.05591
Data			Data
Number of X values	13		Number of X values	13
Maximum number of Y replicates	1		Maximum number of Y replicates	1
Total number of values	13		Total number of values	13
Number of missing values	0		Number of missing values	0

## Sheet: Panel B
Panel B- % PDGFRa+tdT+Olig2+ of tdT+Olig2+ vs EAE score
B2mtdT Spinal Cord			Cd74tdT Spinal Cord
EAE score	%PDGFRa+TdT+Olig2+		EAE score	%PDGFRa+TdT+Olig2+
0	23.53		2.5	18.75
0	9.86		3	21.74
0	6.54		3	0
0	7.41		2	33.33
2	9.24		3.5	17.65
2.5	1.48		2.5	9.09
3	8.33
2	26.09
3	19.16
3.5	15.79
3	6.08
3.5	10.3
Linear Regression			Linear Regression
Best-fit values			Best-fit values
Slope	-0.1383		Slope	-9.662
Y-intercept	12.24		Y-intercept	43.33
X-intercept	88.53		X-intercept	4.485
1/slope	-7.231		1/slope	-0.1035
Std. Error			Std. Error
Slope	1.624		Slope	9.681
Y-intercept	3.803		Y-intercept	27.02
95% Confidence Intervals			95% Confidence Intervals
Slope	-3.758 to 3.481		Slope	-36.54 to 17.22
Y-intercept	3.771 to 20.72		Y-intercept	-31.70 to 118.4
X-intercept	4.753 to +infinity		X-intercept	2.992 to +infinity
Goodness of Fit			Goodness of Fit
R squared	0.0007243		R squared	0.1994
Sy.x	7.885		Sy.x	11.35
Is slope significantly non-zero?			Is slope significantly non-zero?
F	0.007248		F	0.996
DFn, DFd	1, 10		DFn, DFd	1, 4
P value	0.9338		P value	0.3748
Deviation from zero?	Not Significant		Deviation from zero?	Not Significant
Equation	Y = -0.1383*X + 12.24		Equation	Y = -9.662*X + 43.33
Data			Data
Number of X values	12		Number of X values	6
Maximum number of Y replicates	1		Maximum number of Y replicates	1
Total number of values	12		Total number of values	6
Number of missing values	0		Number of missing values	0

## Sheet: Panel C
Panel C- % PDGFRa+tdT+Olig2+ of tdT+Olig2+ vs tdT mean intensity
B2mtdT Spinal Cord			Cd74tdT Spinal Cord
mean tdT intensity	%PDGFRa+tdT+Olig2+		mean tdT intensity	%PDGFRa+tdT+Olig2+
15.6	23.53		14.8	18.75
15.7	9.86		10.8	21.74
23.8	6.54		10	0
25.7	9.24		7.8	33.33
40.4	1.48		22.1	17.65
35.3	8.33		20.6	9.09
33.6	26.09
34.4	19.16
31	15.79
51.3	6.08
39.4	10.3
Linear Regression			Linear Regression
Best-fit values			Best-fit values
Slope	-0.2431		Slope	-0.5378
Y-intercept	20.05		Y-intercept	24.48
X-intercept	82.49		X-intercept	45.51
1/slope	-4.114		1/slope	-1.859
Std. Error			Std. Error
Slope	0.2259		Slope	0.9241
Y-intercept	7.477		Y-intercept	14.16
95% Confidence Intervals			95% Confidence Intervals
Slope	-0.7540 to 0.2679		Slope	-3.104 to 2.028
Y-intercept	3.136 to 36.96		Y-intercept	-14.85 to 63.80
X-intercept	45.67 to +infinity		X-intercept	16.97 to +infinity
Goodness of Fit			Goodness of Fit
R squared	0.114		R squared	0.07806
Sy.x	7.682		Sy.x	12.18
Is slope significantly non-zero?			Is slope significantly non-zero?
F	1.158		F	0.3387
DFn, DFd	1, 9		DFn, DFd	1, 4
P value	0.3099		P value	0.5918
Deviation from zero?	Not Significant		Deviation from zero?	Not Significant
Equation	Y = -0.2431*X + 20.05		Equation	Y = -0.5378*X + 24.48
Data			Data
Number of X values	11		Number of X values	6
Maximum number of Y replicates	1		Maximum number of Y replicates	1
Total number of values	11		Total number of values	6
Number of missing values	0		Number of missing values	0

## Sheet: Panel D
Panel D- %PDGFRa+tdT+Olig2+ vs %Olig2+tdT
B2mtdT Spinal Cord			Cd74tdT Spinal Cord
%tdT+Olig2+	%PDGFRa+tdT+Olig2+		%tdT+Olig2+	%PDGFRa+tdT+Olig2+
0.34	23.53		0.47	18.75
1.04	9.86		0.31	21.74
1.05	6.54		0.67	0
1.46	7.41		0.18	33.33
3.49	9.24		1.14	17.65
4.49	1.48		1.38	9.09
3.95	8.33
4.26	26.09
9.66	19.16
1.67	15.79
16.81	6.08
11.84	10.3
Linear Regression			Linear Regression
Best-fit values			Best-fit values
Slope	-0.226		Slope	-13.55
Y-intercept	13.12		Y-intercept	26.13
X-intercept	58.02		X-intercept	1.929
1/slope	-4.424		1/slope	-0.0738
Std. Error			Std. Error
Slope	0.4587		Slope	9.813
Y-intercept	3.214		Y-intercept	8.015
95% Confidence Intervals			95% Confidence Intervals
Slope	-1.248 to 0.7959		Slope	-40.80 to 13.70
Y-intercept	5.954 to 20.28		Y-intercept	3.879 to 48.39
X-intercept	13.54 to +infinity		X-intercept	0.9312 to +infinity
Goodness of Fit			Goodness of Fit
R squared	0.02371		R squared	0.3228
Sy.x	7.794		Sy.x	10.44
Is slope significantly non-zero?			Is slope significantly non-zero?
F	0.2429		F	1.907
DFn, DFd	1, 10		DFn, DFd	1, 4
P value	0.6328		P value	0.2395
Deviation from zero?	Not Significant		Deviation from zero?	Not Significant
Equation	Y = -0.2260*X + 13.12		Equation	Y = -13.55*X + 26.13
Data			Data
Number of X values	12		Number of X values	6
Maximum number of Y replicates	1		Maximum number of Y replicates	1
Total number of values	12		Total number of values	6
Number of missing values	0		Number of missing values	0
