# Supplementary material for: MHC class I and MHC class II reporter mice enable analysis of immune oligodendroglia in mouse models of multiple sclerosis
Source: eLife. 2023 Apr 14;12:e82938. doi: 10.7554/eLife.82938 (PMC10181822; doi:10.7554/eLife.82938)
Supplement: Figure 7—source data 1. [file elife-82938-fig7-data1.xlsx]

## Sheet: Panel D
Panel D- % tdT+Olig2+ of Olig2+
B2mtdT Spinal Cord					Cd74tdT Spinal Cord
All region mean					All region mean
	no EAE	EAE score 0	EAE score >0			EAE score 0	EAE score >0
	0.72	0.34	1.19			0.02	0.47
	0.92	1.04	1.67			0	1.38
	1.94	1.46	3.49			0.03	0.31
	1.6	1.05	4.26				0.67
			4.49				1.35
			3.95				1.14
			9.66				0.15
			16.81				0.26
			11.84				0.18
							0.05
	Mean	SEM	N			Mean	SEM	N
baseline	1.295	0.285818	4		EAE score 0	0.0166667	0.00881917	3
EAE score 0	0.9725	0.232428	4		EAE score >0	0.596	0.162112	10
EAE score >0	6.37333	1.75118	9
Column C	EAE score >0				Column B	EAE score >0
vs.	vs.				vs.	vs.
Column A	baseline				Column A	EAE score 0
Mann Whitney test					Mann Whitney test
P value	0.0196				P value	0.007
Exact or approximate P value?	Exact				Exact or approximate P value?	Exact
P value summary	*				P value summary	**
Significantly different (P < 0.05)?	Yes				Significantly different (P < 0.05)?	Yes
One- or two-tailed P value?	Two-tailed				One- or two-tailed P value?	Two-tailed
Sum of ranks in column A,C	13 , 78				Sum of ranks in column A,B	6 , 85
Mann-Whitney U	3				Mann-Whitney U	0
Difference between medians					Difference between medians
Median of column A	1.260, n=4				Median of column A	0.02000, n=3
Median of column C	4.260, n=9				Median of column B	0.3900, n=10
Difference: Actual	3				Difference: Actual	0.37
Difference: Hodges-Lehmann	2.96				Difference: Hodges-Lehmann	0.375
96.64% CI of difference	0.2700 to 11.12				95.10% CI of difference	0.1200 to 1.350
Exact or approximate CI?	Exact				Exact or approximate CI?	Exact
Column C	EAE score >0
vs.	vs.
Column B	EAE score 0
Mann Whitney test
P value	0.0056
Exact or approximate P value?	Exact
P value summary	**
Significantly different (P < 0.05)?	Yes
One- or two-tailed P value?	Two-tailed
Sum of ranks in column B,C	11 , 80
Mann-Whitney U	1
Difference between medians
Median of column B	1.045, n=4
Median of column C	4.260, n=9
Difference: Actual	3.215
Difference: Hodges-Lehmann	3.215
96.64% CI of difference	0.6200 to 11.50
Exact or approximate CI?	Exact

## Sheet: Panel F
Panel F- %tdT+Olig2+ of Olig2+ lesion vs non-lesion EAE spinal cord
	B2mtdT EAE spinal cord				Cd74tdT EAE spinal cord
	Lesion	Non-Lesion			Lesion	Non-Lesion
	2.03	0.74			0.53	0.39
	3.76	3.36			0.18	0.44
	5.47	3.86			0.77	0.39
	4.06	4.4			1.61	1.07
	4.44	3.11			1.17	0.85
	11.67	7.24			0.13	0.18
	18.53	10.06			0.24	0.27
	12.23	11.32			0.35	0.14
					0.09	0.03
Column B	Non-Lesion			Column B	Non-Lesion
vs.	vs.			vs.	vs.
Column A	Lesion			Column A	Lesion
Wilcoxon matched-pairs signed rank test				Wilcoxon matched-pairs signed rank test
P value	0.0156			P value	0.1289
Exact or approximate P value?	Exact			Exact or approximate P value?	Exact
P value summary	*			P value summary	ns
Significantly different (P < 0.05)?	Yes			Significantly different (P < 0.05)?	No
One- or two-tailed P value?	Two-tailed			One- or two-tailed P value?	Two-tailed
Sum of positive, negative ranks	1.000 , -35.00			Sum of positive, negative ranks	9.000 , -36.00
Sum of signed ranks (W)	-34			Sum of signed ranks (W)	-27
Number of pairs	8			Number of pairs	9
Number of ties (ignored)	0			Number of ties (ignored)	0
Median of differences				Median of differences
Median	-1.31			Median	-0.14
How effective was the pairing?				How effective was the pairing?
rs (Spearman)	0.8571			rs (Spearman)	0.7615
P value (one tailed)	0.0054			P value (one tailed)	0.0106
P value summary	**			P value summary	*
Was the pairing significantly effective?	Yes			Was the pairing significantly effective?	Yes

## Sheet: Panel G
Panel G- % tdT+Olig2+ of Olig2+ vs CD45 density % area
B2mtdT EAE Spinal Cord			Cd74tdT EAE Spinal Cord
%tdT+Olig2+ of Olig2+	CD45 density		%tdT+Olig2+ of Olig2+	CD45 density
5.61224	11.589		0.291206	5.436
7.34433	13.753		0.200401	6.96
8.24216	13.071		0.61237	3.923
3.54919	7.876		0.650759	3.341
1.8574	8.114		0.682927	7.247
4.88559	4.915		0.866739	5.174
1.60727	5.542		0.820793	6.96
4.26189	13.942		0.641026	8.11
3.69898	11.518		0.210748	18.844
1.46306	4.911		0.314961	13.827
			0.255232	39.477
			0.271297	21.528
Linear Regression			Linear Regression
Best-fit values			Best-fit values
Slope	0.4451		Slope	-0.0133
Y-intercept	0.01367		Y-intercept	0.641
X-intercept	-0.03072		X-intercept	48.19
1/slope	2.247		1/slope	-75.18
Std. Error			Std. Error
Slope	0.1605		Slope	0.006238
Y-intercept	1.628		Y-intercept	0.0964
95% Confidence Intervals			95% Confidence Intervals
Slope	0.07487 to 0.8153		Slope	-0.02720 to 0.0005973
Y-intercept	-3.740 to 3.768		Y-intercept	0.4262 to 0.8558
X-intercept	-47.79 to 4.830		X-intercept	28.11 to +infinity
Goodness of Fit			Goodness of Fit
R squared	0.49		R squared	0.3126
Sy.x	1.768		Sy.x	0.2173
Is slope significantly non-zero?			Is slope significantly non-zero?
F	7.686		F	4.547
DFn, DFd	1, 8		DFn, DFd	1, 10
P value	0.0242		P value	0.0588
Deviation from zero?	Significant		Deviation from zero?	Not Significant
Equation	Y = 0.4451*X + 0.01367		Equation	Y = -0.01330*X + 0.6410
Data			Data
Number of X values	10		Number of X values	12
Maximum number of Y replicates	1		Maximum number of Y replicates	1
Total number of values	10		Total number of values	12
Number of missing values	0		Number of missing values	0
Number of missing values	0		Number of missing values	0

## Sheet: Panel H
Panel H- % tdT+Olig2+ of Olig2+ vs ROI TtdT mean intensity
B2mtdT EAE Spinal Cord			Cd74tdT EAE Spinal Cord
tdT Mean Gray Value	%tdT+Olig2+ of Olig2+		tdT Mean Gray Value	%tdT+Olig2+ of Olig2+
15.6	0.34		7.6	0.02
15.6	0.34		10	0
15.7	1.04		10.6	0.03
23.8	1.46		14.8	0.47
19.7	1.19		20.6	1.38
31	1.67		10.8	0.31
25.7	3.49		10	0.67
33.6	4.26		18.3	1.35
40.4	4.49		22.1	1.14
35.3	3.95		9.2	0.15
34.4	9.66		10.5	0.26
51.3	16.81		7.8	0.18
39.4	11.84		8.6	0.05
Linear Regression			Linear Regression
Best-fit values			Best-fit values
Slope	0.3864		Slope	0.09379
Y-intercept	-6.683		Y-intercept	-0.6986
X-intercept	17.29		X-intercept	7.448
1/slope	2.588		1/slope	10.66
Std. Error			Std. Error
Slope	0.07234		Slope	0.01338
Y-intercept	2.259		Y-intercept	0.1773
95% Confidence Intervals			95% Confidence Intervals
Slope	0.2272 to 0.5456		Slope	0.06435 to 0.1232
Y-intercept	-11.66 to -1.710		Y-intercept	-1.089 to -0.3084
X-intercept	7.137 to 22.52		X-intercept	4.586 to 9.233
Goodness of Fit			Goodness of Fit
R squared	0.7218		R squared	0.8172
Sy.x	2.791		Sy.x	0.2285
Is slope significantly non-zero?			Is slope significantly non-zero?
F	28.54		F	49.17
DFn, DFd	1, 11		DFn, DFd	1, 11
P value	0.0002		P value	<0.0001
Deviation from zero?	Significant		Deviation from zero?	Significant
Equation	Y = 0.3864*X - 6.683		Equation	Y = 0.09379*X - 0.6986
Data			Data
Number of X values	13		Number of X values	13
Maximum number of Y replicates	1		Maximum number of Y replicates	1
Total number of values	13		Total number of values	13
Number of missing values	0		Number of missing values	0

## Sheet: Panel I
Panel I- %CC1+ of tdT+Olig2+
B2mtdT naïve spinal cord
%CC1+ of TdT+Olig2+
85.3333
91.2281
91.6667
86.1789
Mean	SEM	N
88.6	1.654	4

## Sheet: Panel J
Panel J- %PDGFRa-tdT+Olig2+
	B2mtdT	B2mtdT	B2mtdT	B2mtdT
	baseline	EAE score 0	EAE score >0	EAE score >0
	6.52	23.53	9.24	18.75
	6.45	9.86	1.48	21.74
	5.81	6.54	8.33	0
		7.41	26.09	33.33
			19.16	17.65
			15.79	9.09
			6.08
			10.3
		Mean	SEM	N
	B2mtdT baseline	6.26	0.225906	3
	B2mtdT EAE score 0	11.835	3.96118	4
	B2mtdT EAE score >0	12.0587	2.78332	8
	Cd74tdT EAE score >0	16.76	4.63265	6
Column B	B2mtdT EAE score >0
vs.	vs.
Column A	B2mtdT baseline
Mann Whitney test
P value	0.1939
Exact or approximate P value?	Exact
P value summary	ns
Significantly different (P < 0.05)?	No
One- or two-tailed P value?	Two-tailed
Sum of ranks in column A,B	11 , 55
Mann-Whitney U	5
Difference between medians
Median of column A	6.450, n=3
Median of column B	9.770, n=8
Difference: Actual	3.32
Difference: Hodges-Lehmann	3.605
95.15% CI of difference	-4.330 to 19.57
Exact or approximate CI?	Exact

## Sheet: B2M SC EAE
B2m baseline spinal cord						B2m EAE score 0 spinal cord							B2m EAE score > 0 spinal cord
B2m baseline #1						B2m EAE score 0 #1							B2m EAE score> 0 #1 (score 1.5)
Section	Region	Total Olig2+	Total tdT+Olig2+	%tdT+Olig2+		Section	Region	Mean tdT	Total Olig2+	Total tdT+Olig2+	%tdT+Olig2+		Section	Region	Mean tdT	Total Olig2+	Total tdT+Olig2+	%tdT+Olig2+	Lesion?
1	Center	356	8	2.24719		1	Center	18.792	205	0	0		1	Center	23.417	211	0	0	N
2	Center	376	0	0		2	Center	16.386	225	0	0		2	Center	19.037	159	0	0	N
3	Center	413	0	0		3	Center	16.726	194	0	0		3	Center	18.353	121	1	0.826446
4	Center	363	0	0		4	Center	20.749	235	0	0		4	Center	19.347	227	0	0	N
1	Dorsal L	203	0	0		1	Dorsal L	12.943	157	0	0		1	Dorsal L	22.968	237	0	0	N
2	Dorsal L	317	0	0		2	Dorsal L	12.097	157	0	0		2	Dorsal L	15.38	158	4	2.53165	N
3	Dorsal L					3	Dorsal L	12.986	155	2	1.29032		3	Dorsal L	19.898	180	5	2.77778	N
4	Dorsal L	260	1	0.384615		4	Dorsal L	17.719	181	0	0		4	Dorsal L	20.59	185	3	1.62162	N
1	Dorsal R	213	4	1.87793		1	Dorsal R	13.006	184	0	0		1	Dorsal R	21.347	181	1	0.552486	N
2	Dorsal R	261	1	0.383142		2	Dorsal R	12.459	172	2	1.16279		2	Dorsal R	15.851	107	1	0.934579	N
3	Dorsal R	308	0	0		3	Dorsal R	14.424	195	0	0		3	Dorsal R	20.82	178	3	1.68539	N
4	Dorsal R	245	4	1.63265		4	Dorsal R	17.452	211	0	0		4	Dorsal R	17.92	142	4	2.8169	N
1	Lateral L	254	0	0		1	Lateral L	14.389	142	0	0		1	Lateral L	21.991	128	2	1.5625	N
2	Lateral L	344	0	0		2	Lateral L	13.039	212	0	0		2	Lateral L		216	2	0.925926
3	Lateral L	217	0	0		3	Lateral L	12.325	217	0	0		3	Lateral L	18.105	155	7	4.51613	N
4	Lateral L	282	3	1.06383		4	Lateral L	15.772	179	0	0		4	Lateral L	18.218	93	1	1.07527	N
1	Lateral R	274	4	1.45985		1	Lateral R	14.4	185	4	2.16216		1	Lateral R	22.597	251	0	0	N
2	Lateral R	380	4	1.05263		2	Lateral R	14.925	184	1	0.543478		2	Lateral R
3	Lateral R	317	0	0		3	Lateral R	14.339	218	4	1.83486		3	Lateral R	17.563	167	3	1.79641	N
4	Lateral R	334	2	0.598802		4	Lateral R	16.205	179	0	0		4	Lateral R	15.811	175	1	0.571429	N
1	Ventral L	324	0	0		1	Ventral L	19.389	85	0	0		1	Ventral L	25.477	106	0	0	N
2	Ventral L	286	1	0.34965		2	Ventral L	15.914	94	1	1.06383		2	Ventral L	19.254	90	1	1.11111	N
3	Ventral L	268	0	0		3	Ventral L	13.628	114	0	0		3	Ventral L	17.054	49	1	2.04082	N
4	Ventral L	262	8	3.05344		4	Ventral L	17.31	104	0	0		4	Ventral L	18.218	93	1	1.07527	N
1	Ventral R	297	16	5.38721		1	Ventral R	20.127	95	0	0		1	Ventral R	27.003	137	1	0.729927	N
2	Ventral R	221	1	0.452489		2	Ventral R	16.846	146	1	0.684932		2	Ventral R	20.893	113	2	1.76991	N
3	Ventral R	344	0	0		3	Ventral R	14.73	118	1	0.847458		3	Ventral R	18.242	89	3	3.37079	N
4	Ventral R	248	0	0		4	Ventral R	16.68	145	0	0		4	Ventral R	15.999	97	1	1.03093	N
		7967	57	0.715451				15.5627	4688	16	0.341297				19.6674	4045	48	1.18665
			N	27						N	28						N	27
B2m baseline #2						B2m EAE score 0 #2							B2m EAE score> 0 #2 (score 3.5)
Section	Region	Total Olig2+	Total tdT+Olig2+	%tdT+Olig2+		Section	Region	Mean tdT	Total Olig2+	Total tdT+Olig2+	%tdT+Olig2+		Section	Region	Mean tdT	Total Olig2+	Total tdT+Olig2+	%tdT+Olig2+	Lesion?		lesion	nonlesion
1	Center	262	0	0		1	Center	15.998	276	0	0		1	Center	31.17	274	4	1.45985	N	DP	58	8
2	Center	271	0	0		2	Center	14.104	240	1	0.416667		2	Center	33.057	244	2	0.819672	N	Olig2	2860	1082
3	Center					3	Center	17.289	59	0	0		3	Center	42.069	200	1	0.5	N		2.02797	0.739372
4	Center	271	0	0		4	Center	20.226	270	0	0		4	Center	35.457	181	1	0.552486	N	N	22	5
1	Dorsal L	275	10	3.63636		1	Dorsal L	13.176	171	1	0.584795		1	Dorsal L	26.528	116	0	0	Y
2	Dorsal L	255	4	1.56863		2	Dorsal L	11.819	180	7	3.88889		2	Dorsal L	24.797	54	2	3.7037	Y
3	Dorsal L					3	Dorsal L	16.013	122	7	5.7377		3	Dorsal L	37.974	72	0	0	Y
4	Dorsal L	273	5	1.8315		4	Dorsal L	19.09	174	0	0		4	Dorsal L	32.273	123	2	1.62602	Y
1	Dorsal R	222	3	1.35135		1	Dorsal R	12.528	179	1	0.558659		1	Dorsal R	27.262	153	0	0	Y
2	Dorsal R	294	4	1.36054		2	Dorsal R	11.094	156	6	3.84615		2	Dorsal R	30.018	105	2	1.90476	Y
3	Dorsal R	254	0	0		3	Dorsal R	15.72	68	3	4.41176		3	Dorsal R	47.068	99	4	4.0404	Y
4	Dorsal R	267	2	0.749064		4	Dorsal R	16.388	159	1	0.628931		4	Dorsal R	32.053	157	5	3.18471	Y
1	Lateral L	262	3	1.14504		1	Lateral L	15.931	202	2	0.990099		1	Lateral L	32.399	148	3	2.02703	Y
2	Lateral L	250	3	1.2		2	Lateral L	12.072	163	2	1.22699		2	Lateral L	26.384	149	5	3.3557	Y
3	Lateral L					3	Lateral L	15.607	62	0	0		3	Lateral L	26.263	130	2	1.53846	Y
4	Lateral L	235	0	0		4	Lateral L	18.262	185	0	0		4	Lateral L	34.04	183	0	0	N
1	Lateral R	250	4	1.6		1	Lateral R	14.383	226	0	0		1	Lateral R	32.554	205	3	1.46341	Y
2	Lateral R	235	2	0.851064		2	Lateral R	12.602	180	5	2.77778		2	Lateral R	28.85	171	6	3.50877	Y
3	Lateral R	212	0	0		3	Lateral R	14.792	68	2	2.94118		3	Lateral R	32.211	135	1	0.740741	Y
4	Lateral R	224	2	0.892857		4	Lateral R	16.31	182	0	0		4	Lateral R	25.485	101	0	0	Y
1	Ventral L	187	0	0		1	Ventral L	18.455	175	0	0		1	Ventral L	26.177	226	4	1.76991	Y
2	Ventral L	215	1	0.465116		2	Ventral L	14.397	127	1	0.787402		2	Ventral L
3	Ventral L					3	Ventral L	15.837	65	1	1.53846		3	Ventral L	22.755	107	3	2.80374	Y
4	Ventral L	178	2	1.1236		4	Ventral L	18.579	166	2	1.20482		4	Ventral L	33.826	174	6	3.44828	Y
1	Ventral R	150	0	0		1	Ventral R	19.863	157	0	0		1	Ventral R	34.374	158	3	1.89873	Y
2	Ventral R	211	3	1.4218		2	Ventral R	15.38	174	4	2.29885		2	Ventral R	30.409	87	0	0	Y
3	Ventral R					3	Ventral R	16.741	47	0	0		3	Ventral R	23.271	79	3	3.79747	Y
4	Ventral R	177	2	1.12994		4	Ventral R	18.261	200	0	0		4	Ventral R	27.056	111	4	3.6036	Y
		5430	50	0.92081				15.747	4433	46	1.03767				30.9548	3942	66	1.67428
			N	23						N	28						N	27
B2m baseline #3						B2m EAE score 0 #3							B2m EAE score> 0 #3 (score 2)
Section	Region	Total Olig2+	Total tdT+Olig2+	%tdT+Olig2+		Section	Region	Mean tdT	Total Olig2+	Total tdT+Olig2+	%tdT+Olig2+		Section	Region	Mean tdT	Total Olig2+	Total tdT+Olig2+	%tdT+Olig2+	Lesion?		lesion	nonlesion
1	Center	334	1	0.299401		1	Center	28.176	300	3	1		1	Center	24.031	175	1	0.571429	N	DP	43	76
2	Center	265	0	0		2	Center	28.705	210	0	0		2	Center	25.741	203	0	0	N	Olig2	1143	2263
3	Center	307	0	0		3	Center	28.802	257	0	0		3	Center	22.854	206	0	0	N		3.76203	3.35837
4	Center	311	0	0		4	Center	34.697	276	3	1.08696		4	Center	22.811	160	0	0	N	N	11	16
1	Dorsal L	208	1	0.480769		1	Dorsal L	21.426	114	0	0		1	Dorsal L	29.166	95	10	10.5263	Y
2	Dorsal L	228	4	1.75439		2	Dorsal L	23.193	181	1	0.552486		2	Dorsal L	27.393	124	5	4.03226	Y
3	Dorsal L	199	3	1.50754		3	Dorsal L	23.788	179	5	2.7933		3	Dorsal L	24.636	105	5	4.7619	Y
4	Dorsal L	195	0	0		4	Dorsal L	30.082	148	3	2.02703		4	Dorsal L	22.642	90	0	0	Y
1	Dorsal R	147	2	1.36054		1	Dorsal R	20.851	123	2	1.62602		1	Dorsal R	26.728	122	4	3.27869	N
2	Dorsal R	195	5	2.5641		2	Dorsal R	20.562	181	0	0		2	Dorsal R	23.001	141	6	4.25532	N
3	Dorsal R	180	4	2.22222		3	Dorsal R	21.561	157	1	0.636943		3	Dorsal R	21.308	164	6	3.65854	N
4	Dorsal R	155	1	0.645161		4	Dorsal R	27.286	195	1	0.512821		4	Dorsal R	22.162	79	5	6.32911	Y
1	Lateral L	254	13	5.11811		1	Lateral L	20.188	157	0	0		1	Lateral L	18.626	120	3	2.5	N
2	Lateral L	246	1	0.406504		2	Lateral L	21.414	229	4	1.74672		2	Lateral L	23.898	119	10	8.40336	N
3	Lateral L	222	4	1.8018		3	Lateral L	19.137	197	10	5.07614		3	Lateral L	23.602	114	4	3.50877	N
4	Lateral L	225	1	0.444444		4	Lateral L	23.597	152	5	3.28947		4	Lateral L	22.274	108	0	0	Y
1	Lateral R	245	4	1.63265		1	Lateral R	25.063	164	0	0		1	Lateral R	29.6	88	2	2.27273	Y
2	Lateral R	213	1	0.469484		2	Lateral R	23.418	220	0	0		2	Lateral R	31.626	91	4	4.3956	Y
3	Lateral R	189	7	3.7037		3	Lateral R	20.027	181	1	0.552486		3	Lateral R	23.983	84	4	4.7619	Y
4	Lateral R	251	8	3.18725		4	Lateral R	26.521	213	7	3.28638		4	Lateral R	31.323	88	1	1.13636	Y
1	Ventral L	268	18	6.71642		1	Ventral L	21.163	192	2	1.04167		1	Ventral L	31.812	144	12	8.33333	N
2	Ventral L	223	1	0.44843		2	Ventral L	20.961	252	1	0.396825		2	Ventral L	32.077	149	2	1.34228	N
3	Ventral L	191	8	4.18848		3	Ventral L	20.13	219	8	3.65297		3	Ventral L	24.079	86	2	2.32558	Y
4	Ventral L	241	7	2.90456		4	Ventral L	22.497	220	8	3.63636		4	Ventral L	23.78	126	8	6.34921	N
1	Ventral R	257	10	3.89105		1	Ventral R	21.893	218	4	1.83486		1	Ventral R	27.026	106	7	6.60377	N
2	Ventral R	182	1	0.549451		2	Ventral R	23.738	231	1	0.4329		2	Ventral R	30.259	114	7	6.14035	N
3	Ventral R	212	1	0.471698		3	Ventral R	21.46	199	3	1.50754		3	Ventral R	30.908	105	5	4.7619	Y
4	Ventral R	205	17	8.29268		4	Ventral R	25.949	187	8	4.27807		4	Ventral R	21.508	100	6	6	N
		6348	123	1.93762				23.7959	5552	81	1.45893				25.6734	3406	119	3.49383
			N	28						N	28						N	28
B2m baseline #4						B2m EAE score 0 #4							B2m EAE score> 0 #4 (score 2)
Section	Region	Total Olig2+	Total tdT+Olig2+	%tdT+Olig2+		Section	Region	Mean tdT	Total Olig2+	Total tdT+Olig2+	%tdT+Olig2+		Section	Region	Mean tdT	Total Olig2+	Total tdT+Olig2+	%tdT+Olig2+	Lesion?		lesion	nonlesion
1	Center	363	0	0		1	Center		352	0	0		1	Center						DP	39	84
2	Center					2	Center		355	0	0		2	Center	40.381	205	0	0	N	Olig2	713	2175
3	Center					3	Center		308	0	0		3	Center	56.828	178	12	6.74157	N		5.46985	3.86207
4	Center	321	0	0		4	Center		341	0	0		4	Center	45.247	179	2	1.11732	N	N	7	15
1	Dorsal L	353	11	3.11615		1	Dorsal L		248	3	1.20968		1	Dorsal L	21.891	58	0	0	Y
2	Dorsal L					2	Dorsal L						2	Dorsal L	22.708	117	0	0	N
3	Dorsal L					3	Dorsal L		189	1	0.529101		3	Dorsal L	34.902	113	6	5.30973	N
4	Dorsal L					4	Dorsal L		208	4	1.92308		4	Dorsal L	41.426	176	0	0	N
1	Dorsal R					1	Dorsal R		240	4	1.66667		1	Dorsal R	19.733	146	0	0	N
2	Dorsal R					2	Dorsal R						2	Dorsal R	25.825	123	4	3.25203	N
3	Dorsal R					3	Dorsal R		225	0	0		3	Dorsal R	39.177	145	7	4.82759	N
4	Dorsal R					4	Dorsal R		231	1	0.4329		4	Dorsal R	41.049	117	1	0.854701	N
1	Lateral L	305	3	0.983607		1	Lateral L		223	1	0.44843		1	Lateral L
2	Lateral L					2	Lateral L		272	2	0.735294		2	Lateral L	24.849	102	4	3.92157	Y
3	Lateral L	288	1	0.347222		3	Lateral L		196	4	2.04082		3	Lateral L	30.428	118	2	1.69492	Y
4	Lateral L	281	0	0		4	Lateral L		259	0	0		4	Lateral L	28.518	90	6	6.66667	Y
1	Lateral R	242	3	1.23967		1	Lateral R		283	8	2.82686		1	Lateral R
2	Lateral R					2	Lateral R						2	Lateral R	31.161	107	0	0	Y
3	Lateral R					3	Lateral R		286	3	1.04895		3	Lateral R	37.977	85	6	7.05882	Y
4	Lateral R	238	4	1.68067		4	Lateral R		248	5	2.01613		4	Lateral R	38.344	88	10	11.3636	Y
1	Ventral L	257	2	0.77821		1	Ventral L		306	2	0.653595		1	Ventral L
2	Ventral L	330	4	1.21212		2	Ventral L		321	3	0.934579		2	Ventral L	33.161	79	3	3.79747	N
3	Ventral L	248	6	2.41935		3	Ventral L		242	2	0.826446		3	Ventral L	28.104	121	13	10.7438	N
4	Ventral L	314	3	0.955414		4	Ventral L		298	5	1.67785		4	Ventral L	34.467	220	5	2.27273	N
1	Ventral R	320	2	0.625		1	Ventral R		302	3	0.993377		1	Ventral R
2	Ventral R	248	8	3.22581		2	Ventral R		274	9	3.28467		2	Ventral R	33.953	65	11	16.9231	Y
3	Ventral R	290	13	4.48276		3	Ventral R		267	7	2.62172		3	Ventral R	27.904	96	16	16.6667	N
4	Ventral R	298	15	5.03356		4	Ventral R		280	4	1.42857		4	Ventral R	34.867	160	15	9.375	N
		4696	75	1.5971					6754	71	1.05123				33.6043	2888	123	4.259
			N	16						N	25						N	23
													B2m EAE score> 0 #5 (score 2.5)
													Section	Region	Mean tdT	Total Olig2+	Total tdT+Olig2+	%tdT+Olig2+	Lesion?		lesion	nonlesion
													1	Center						DP	48	38
													2	Center	44.704	126	10	7.93651	N	Olig2	1183	864
													3	Center	42.306	173	5	2.89017	N		4.05748	4.39815
													4	Center	50.794	82	2	2.43902	N	N	13	8
													1	Dorsal L	39.118	90	1	1.11111	Y
													2	Dorsal L	41.408	95	4	4.21053	Y
													3	Dorsal L	42.702	103	1	0.970874	Y
													4	Dorsal L	55.136	93	6	6.45161	N
													1	Dorsal R	39.767	90	5	5.55556	Y
													2	Dorsal R	41.676	97	6	6.18557	Y
													3	Dorsal R	42.67	67	1	1.49254	Y
													4	Dorsal R	46.272	79	7	8.86076	Y
													1	Lateral L
													2	Lateral L	26.883	72	2	2.77778	Y
													3	Lateral L	33.262	84	4	4.7619	N
													4	Lateral L	32.718	55	1	1.81818	N
													1	Lateral R
													2	Lateral R	40.73	75	1	1.33333	Y
													3	Lateral R	38.914	75	4	5.33333	Y
													4	Lateral R	42.198	72	5	6.94444	Y
													1	Ventral L
													2	Ventral L	40.018	114	6	5.26316	N
													3	Ventral L	31.532	116	5	4.31034	Y
													4	Ventral L					N
													1	Ventral R
													2	Ventral R	42.54	152	6	3.94737	Y
													3	Ventral R	32.568	137	10	7.29927	N
													4	Ventral R
															40.377	2047	92	4.49438
																	N	21
													B2m EAE score> 0 #6 (score 3)
													Section	Region	Mean tdT	Total Olig2+	Total tdT+Olig2+	%tdT+Olig2+	Lesion?		lesion	nonlesion
													1	Center	28.616	79	1	1.26582	N	DP	62	25
													2	Center	43.796	152	1	0.657895	N	Olig2	1397	805
													3	Center	58.962	109	0	0	N		4.43808	3.10559
													4	Center	52.492	102	2	1.96078	N	N	14	8
													1	Dorsal L
													2	Dorsal L	23.699	98	5	5.10204	Y
													3	Dorsal L	35.917	92	2	2.17391	Y
													4	Dorsal L	34.4	62	1	1.6129	Y
													1	Dorsal R
													2	Dorsal R	26.326	118	3	2.54237	Y
													3	Dorsal R	39.892	130	1	0.769231	Y
													4	Dorsal R	40.982	59	1	1.69492	Y
													1	Lateral L
													2	Lateral L	23.39	67	6	8.95522	Y
													3	Lateral L	28.042	71	2	2.8169	N
													4	Lateral L	24.249	41	5	12.1951	N
													1	Lateral R	20.68	71	0	0	Y
													2	Lateral R	40.347	143	6	4.1958	Y
													3	Lateral R	38.235	142	8	5.6338	Y
													4	Lateral R	31.114	90	1	1.11111	Y
													1	Ventral L
													2	Ventral L	38.757	152	6	3.94737	Y
													3	Ventral L	29.115	152	8	5.26316	N
													4	Ventral L
													1	Ventral R
													2	Ventral R	43.676	76	10	13.1579	Y
													3	Ventral R	32.526	97	12	12.3711	Y
													4	Ventral R	41.307	99	6	6.06061	N
															35.2964	2202	87	3.95095
																	N	22
													B2m EAE score> 0 #7 (score 3)
													Section	Region	Mean tdT	Total Olig2+	Total tdT+Olig2+	%tdT+Olig2+	Lesion?		lesion	nonlesion
													1	Center	37.887	142	7	4.92958	N	DP	173	89
													2	Center	39.275	176	10	5.68182	N	Olig2	1483	1229
													3	Center	38.067	227	13	5.72687	N		11.6655	7.24166
													4	Center	40.912	124	7	5.64516	N	N	16	10
													1	Dorsal L
													2	Dorsal L	29.089	93	12	12.9032	Y
													3	Dorsal L	41.798	125	7	5.6	Y
													4	Dorsal L	47.878	107	14	13.0841	Y
													1	Dorsal R
													2	Dorsal R	31.342	68	13	19.1176	Y
													3	Dorsal R	32.476	65	7	10.7692	Y
													4	Dorsal R	42.902	135	3	2.22222	N
													1	Lateral L	34.184	55	0	0	Y
													2	Lateral L	24.917	95	6	6.31579	Y
													3	Lateral L	26.567	97	7	7.21649	Y
													4	Lateral L	35.286	85	12	14.1176	Y
													1	Lateral R	28.995	100	11	11	N
													2	Lateral R	33.032	75	4	5.33333	N
													3	Lateral R	32.113	119	10	8.40336	Y
													4	Lateral R	30.667	76	9	11.8421	N
													1	Ventral L	43.905	94	11	11.7021	Y
													2	Ventral L	33.289	91	12	13.1868	Y
													3	Ventral L	25.403	78	15	19.2308	Y
													4	Ventral L	32.769	125	14	11.2	Y
													1	Ventral R	39.188	104	22	21.1538	Y
													2	Ventral R	33.374	82	11	13.4146	Y
													3	Ventral R	24.55	78	14	17.9487	N
													4	Ventral R	33.369	96	11	11.4583	N
															34.3552	2712	262	9.66077
																	N	26
													B2m EAE score> 0 #8 (score 3)
													Section	Region	Mean tdT	Total Olig2+	Total tdT+Olig2+	%tdT+Olig2+	Lesion?		lesion	nonlesion
													1	Center	63.613	65	14	21.5385	N	DP	377	52
													2	Center	29.574	40	0	0	N	Olig2	2035	517
													3	Center	66.091	79	6	7.59494	N	Av	18.5258	10.058
													4	Center	49.88	63	0	0	N	N	21	7
													1	Dorsal L	45.83	56	12	21.4286	N
													2	Dorsal L	22.728	70	14	20	Y
													3	Dorsal L	59.178	79	22	27.8481	Y
													4	Dorsal L	74.378	72	10	13.8889	Y
													1	Dorsal R	54.712	92	23	25	Y
													2	Dorsal R	19.422	96	9	9.375	Y
													3	Dorsal R	56.996	131	17	12.9771	Y
													4	Dorsal R	65.032	114	37	32.4561	Y
													1	Lateral L	56.173	95	32	33.6842	Y
													2	Lateral L	17.646	62	9	14.5161	Y
													3	Lateral L	34.778	164	10	6.09756	Y
													4	Lateral L	37.085	120	14	11.6667	Y
													1	Lateral R	67.063	128	30	23.4375	Y
													2	Lateral R	32.901	93	23	24.7312	Y
													3	Lateral R	71.783	150	43	28.6667	Y
													4	Lateral R	48.779	85	20	23.5294	Y
													1	Ventral L	68.567	95	11	11.5789	N
													2	Ventral L	37.408	69	13	18.8406	Y
													3	Ventral L	54.187	63	16	25.3968	Y
													4	Ventral L	39.632	100	9	9	Y
													1	Ventral R	79.299	119	9	7.56303	N
													2	Ventral R	78.375	55	2	3.63636	Y
													3	Ventral R	61.669	71	15	21.1268	Y
													4	Ventral R	44.485	126	9	7.14286	Y
															51.3309	2552	429	16.8103
																	N	28
													B2m EAE score> 0 #9 (score 3.5)
													Section	Region	Mean tdT	Total Olig2+	Total tdT+Olig2+	%tdT+Olig2+	Lesion?		lesion	nonlesion
													1	Center						DP	147	101
													2	Center	37.529	161	14	8.69565	N	Olig2	1202	892
													3	Center	34.877	116	13	11.2069	N	Av	12.2296	11.3229
													4	Center	45.277	151	21	13.9073	N	N	11	7
													1	Dorsal L
													2	Dorsal L	41.635	77	13	16.8831	Y
													3	Dorsal L	54.092	88	12	13.6364	Y
													4	Dorsal L	79.145	146	21	14.3836	Y
													1	Dorsal R
													2	Dorsal R	36.495	110	7	6.36364	Y
													3	Dorsal R	48.011	130	10	7.69231	N
													4	Dorsal R	71.75	124	5	4.03226	Y
													1	Lateral L
													2	Lateral L	32.958	108	9	8.33333	Y
													3	Lateral L	23.967	74	11	14.8649	Y
													4	Lateral L	48.114	133	19	14.2857	Y
													1	Lateral R
													2	Lateral R	25.529	128	12	9.375	Y
													3	Lateral R	24.258	118	17	14.4068	N
													4	Lateral R	24.657	118	7	5.9322	N
													1	Ventral L
													2	Ventral L
													3	Ventral L	21.132	98	19	19.3878	N
													4	Ventral L	32.047	127	32	25.1969	Y
													1	Ventral R
													2	Ventral R
													3	Ventral R
													4	Ventral R	27.797	87	6	6.89655	Y
															39.4039	2094	248	11.8434
																	N	18

## Sheet: CD74 SC EAE
Cd74 EAE score 0 spinal cord							CD74 EAE score > 0 spinal cord
Cd74 EAE score 0 #1							Cd74 EAE score>0 #1 (score 2.5)
Section	Region	Mean tdT	Total Olig2+	Total tdT+Olig2+	%tdT+Olig2+		Section	Region	Mean tdT	Total Olig2+	Total tdT+Olig2+	%tdT+Olig2+	Lesion?		lesion	nonlesion
1	Center	8.185	276	0	0		1	Center	12.564	182	3	1.64835	N	DP	9	6
2	Center	7.217	136	0	0		2	Center	14.39	216	0	0	N	Olig2	1684	1535
3	Center	8.278	117	0	0		3	Center	15.56	199	1	0.502513	Y		0.534442	0.390879
4	Center	8.75	281	0	0		4	Center	20.309	104	0	0	N	N	17	11
1	Dorsal L	6.59	143	0	0		1	Dorsal L	11.06	85	0	0	Y
2	Dorsal L	6.009	81	0	0		2	Dorsal L	13.325	86	1	1.16279	Y
3	Dorsal L	7.563	113	0	0		3	Dorsal L	15.468	96	1	1.04167	Y
4	Dorsal L	7.559	171	0	0		4	Dorsal L	19.994	72	0	0	Y
1	Dorsal R	6.986	237	0	0		1	Dorsal R	11.784	67	1	1.49254	Y
2	Dorsal R	6.133	105	0	0		2	Dorsal R	11.297	104	0	0	Y
3	Dorsal R	7.536	118	0	0		3	Dorsal R	14.493	97	0	0	Y
4	Dorsal R	7.459	208	0	0		4	Dorsal R	17.886	58	2	3.44828	Y
1	Lateral L	7.702	171	0	0		1	Lateral L	10.534	111	1	0.900901	N
2	Lateral L	6.863	114	0	0		2	Lateral L	12.619	189	0	0	N
3	Lateral L	7.859	104	0	0		3	Lateral L	12.057	142	2	1.40845	N
4	Lateral L	7.559	238	0	0		4	Lateral L	15.597	79	0	0	Y
1	Lateral R	8.07	285	0	0		1	Lateral R	11.503	72	0	0	Y
2	Lateral R	6.96	209	0	0		2	Lateral R	14.772	119	1	0.840336	Y
3	Lateral R	7.798	85	0	0		3	Lateral R	16.371	131	1	0.763359	Y
4	Lateral R	8.147	254	0	0		4	Lateral R	14.593	99	0	0	N
1	Ventral L	8.329	84	0	0		1	Ventral L	16.496	99	1	1.0101	Y
2	Ventral L	7.113	85	0	0		2	Ventral L	16.339	136	0	0	Y
3	Ventral L	7.859	48	0	0		3	Ventral L	15.968	114	0	0	Y
4	Ventral L	8.096	145	0	0		4	Ventral L	20.418	70	0	0	Y
1	Ventral R	8.656	138	0	0		1	Ventral R	13.843	139	0	0	N
2	Ventral R	7.489	95	0	0		2	Ventral R	13.789	132	0	0	N
3	Ventral R	7.489	62	0	0		3	Ventral R	13.726	133	0	0	N
4	Ventral R	8.536	82	1	1.21951		4	Ventral R	17.043	88	0	0	N
		7.59964	4185	1	0.0238949				14.7785	3219	15	0.465983
				N	28						N	28
Cd74 EAE score 0 #2							Cd74 EAE score>0 #2 (score 2.5)
Section	Region	Mean tdT	Total Olig2+	Total tdT+Olig2+	%tdT+Olig2+		Section	Region	Mean tdT	Total Olig2+	Total tdT+Olig2+	%tdT+Olig2+	Lesion?
1	Center	11.367	316	0	0		1	Center	26.279	151	0	0	N
2	Center	9.856	233	0	0		2	Center	20.911	89	0	0	N
3	Center	9.398	265	0	0		3	Center
4	Center	9.561	293	0	0		4	Center	25.937	105	0	0	N
1	Dorsal L	10.296	239	0	0		1	Dorsal L	19.392	80	0	0	N
2	Dorsal L	8.55	252	0	0		2	Dorsal L	32.431	50	2	4	N
3	Dorsal L	8.928	259	0	0		3	Dorsal L
4	Dorsal L	9.336	275	0	0		4	Dorsal L	22.453	95	0	0	N
1	Dorsal R	9.843	225	0	0		1	Dorsal R	18.242	109	0	0	N
2	Dorsal R	8.873	225	0	0		2	Dorsal R	26.312	86	7	8.13953	N
3	Dorsal R	8.966	250	0	0		3	Dorsal R
4	Dorsal R	9.537	277	0	0		4	Dorsal R	24.468	30	1	3.33333	N
1	Lateral L	10.992	269	0	0		1	Lateral L	19.711	61	0	0	N
2	Lateral L	10.992	219	0	0		2	Lateral L
3	Lateral L	9.511	280	0	0		3	Lateral L	15.758	63	1	1.5873	N
4	Lateral L	10.137	282	0	0		4	Lateral L	18.618	51	1	1.96078	Y
1	Lateral R	10.827	253	0	0		1	Lateral R	19.247	64	1	1.5625	N
2	Lateral R	10.247	269	0	0		2	Lateral R
3	Lateral R	9.452	219	0	0		3	Lateral R
4	Lateral R	9.761	255	0	0		4	Lateral R	17.658	44	0	0	N
1	Ventral L	11.729	153	0	0		1	Ventral L	18.777	63	1	1.5873	N
2	Ventral L	10.448	112	0	0		2	Ventral L
3	Ventral L	9.549	155	0	0		3	Ventral L	17.103	98	1	1.02041	N
4	Ventral L	10.196	158	0	0		4	Ventral L	15.592	84	2	2.38095	N
1	Ventral R	11.773	145	0	0		1	Ventral R	19.352	70	1	1.42857	N
2	Ventral R	10.008	139	0	0		2	Ventral R
3	Ventral R	8.981	109	0	0		3	Ventral R	19.104	93	3	3.22581	N
4	Ventral R	9.532	166	0	0		4	Ventral R	13.988	31	0	0	N
		9.95164	6292	0	0				20.5666	1517	21	1.38431
				N	28						N	20
Cd74 EAE score 0 #3							Cd74 EAE score>0 #3 (score 3)
Section	Region	Mean tdT	Total Olig2+	Total tdT+Olig2+	%tdT+Olig2+		Section	Region	Mean tdT	Total Olig2+	Total tdT+Olig2+	%tdT+Olig2+	Lesion?		lesion	nonlesion
1	Center	11.277	334	0	0		1	Center	10.499	165	1	0.606061	N	DP	3	7
2	Center	10.192	373	0	0		2	Center	10.713	126	2	1.5873	N	Olig2	1655	1590
3	Center	11.259	332	0	0		3	Center	9.615	129	1	0.775194	N		0.181269	0.440252
4	Center	13.176	385	0	0		4	Center	8.643	142	1	0.704225	N	N	15	13
1	Dorsal L						1	Dorsal L	11.843	146	0	0	Y
2	Dorsal L	8.425	251	0	0		2	Dorsal L	12.134	61	0	0	Y
3	Dorsal L	11.029	256	0	0		3	Dorsal L	13.763	71	0	0	Y
4	Dorsal L	13.107	242	0	0		4	Dorsal L	11.373	114	1	0.877193	Y
1	Dorsal R	9.621	244	1	0.409836		1	Dorsal R	14.395	169	0	0	Y
2	Dorsal R	9.164	257	0	0		2	Dorsal R	12.409	51	0	0	Y
3	Dorsal R	11.844	328	0	0		3	Dorsal R	11.604	93	0	0	Y
4	Dorsal R	11.162	209	0	0		4	Dorsal R	14.24	152	0	0	Y
1	Lateral L						1	Lateral L	9.378	156	0	0	N
2	Lateral L	9.468	288	0	0		2	Lateral L	12.348	79	0	0	Y
3	Lateral L	10.063	294	0	0		3	Lateral L	9.566	108	0	0	N
4	Lateral L	11.225	272	0	0		4	Lateral L	8.646	153	0	0	Y
1	Lateral R	10.029	294	0	0		1	Lateral R	9.713	199	0	0	Y
2	Lateral R	10.417	263	0	0		2	Lateral R	10.367	132	0	0	N
3	Lateral R	11.483	252	1	0.396825		3	Lateral R	9.175	118	0	0	N
4	Lateral R	10.2	237	0	0		4	Lateral R	7.606	171	0	0	N
1	Ventral L						1	Ventral L	10.819	94	1	1.06383	N
2	Ventral L	10.084	216	0	0		2	Ventral L	12.621	90	0	0	N
3	Ventral L	10.066	313	0	0		3	Ventral L	9.785	66	0	0	Y
4	Ventral L	10.392	276	0	0		4	Ventral L	8.479	92	1	1.08696	Y
1	Ventral R	8.996	232	0	0		1	Ventral R	12.133	130	0	0	Y
2	Ventral R	11.286	306	0	0		2	Ventral R	11.996	71	0	0	N
3	Ventral R	10.042	198	0	0		3	Ventral R	8.737	88	1	1.13636	N
4	Ventral R	10.443	299	0	0		4	Ventral R	9.451	79	1	1.26582	Y
		10.578	6951	2	0.0287728				10.7875	3245	10	0.308166
				N	25						N	28
							Cd74 EAE score>0 #4 (score 3)
							Section	Region	Mean tdT	Total Olig2+	Total tdT+Olig2+	%tdT+Olig2+	Lesion?		lesion	nonlesion
							1	Center						DP	7	2
							2	Center	7.192	80	0	0	N	Olig2	912	511
							3	Center							0.767544	0.391389
							4	Center	9.85	72	0	0	N	N	13	6
							1	Dorsal L	7.855	41	0	0	Y
							2	Dorsal L	9.11	55	1	1.81818	Y
							3	Dorsal L
							4	Dorsal L	17.564	68	0	0	Y
							1	Dorsal R	7.777	61	0	0	Y
							2	Dorsal R	8.908	64	1	1.5625	Y
							3	Dorsal R	12.846	65	2	3.07692	Y
							4	Dorsal R	11.509	60	0	0	Y
							1	Lateral L		79	1	1.26582
							2	Lateral L	11.56	66	1	1.51515	Y
							3	Lateral L
							4	Lateral L	13.167	74	0	0	Y
							1	Lateral R	7.961	78	2	2.5641	Y
							2	Lateral R
							3	Lateral R	8.699	87	2	2.29885	N
							4	Lateral R	10.929	88	0	0	Y
							1	Ventral L
							2	Ventral L	8.512	66	0	0	N
							3	Ventral L
							4	Ventral L	11.124	57	0	0	Y
							1	Ventral R
							2	Ventral R	7.488	96	0	0	N
							3	Ventral R	7.508	110	0	0	N
							4	Ventral R	9.794	135	0	0	Y
									9.96595	1502	10	0.665779
											N	20
							Cd74 EAE score>0 #5 (score 3)
							Section	Region	Mean tdT	Total Olig2+	Total tdT+Olig2+	%tdT+Olig2+	Lesion?		lesion	nonlesion
							1	Center	23.538	160	1	0.625	N	DP	27	16
							2	Center	20.263	145	2	1.37931	N	Olig2	1680	1501
							3	Center	19.249	184	3	1.63043	N		1.60714	1.06596
							4	Center	19.47	155	1	0.645161	N	N	17	11
							1	Dorsal L	22.332	107	0	0	Y
							2	Dorsal L	17.483	75	2	2.66667	Y
							3	Dorsal L	17.911	89	0	0	Y
							4	Dorsal L	19.979	101	1	0.990099	Y
							1	Dorsal R	24.868	71	1	1.40845	Y
							2	Dorsal R	19.102	77	0	0	Y
							3	Dorsal R	20.691	84	2	2.38095	Y
							4	Dorsal R	18.961	119	0	0	Y
							1	Lateral L	17.851	62	0	0	Y
							2	Lateral L	14.887	112	1	0.892857	Y
							3	Lateral L	17.02	147	5	3.40136	Y
							4	Lateral L	16.201	131	0	0	Y
							1	Lateral R	19.719	99	7	7.07071	Y
							2	Lateral R	17.175	93	2	2.15054	Y
							3	Lateral R	16.376	134	1	0.746269	N
							4	Lateral R	16.788	112	1	0.892857	Y
							1	Ventral L	16.359	124	0	0	N
							2	Ventral L	16.578	106	0	0	N
							3	Ventral L	15.301	133	1	0.75188	Y
							4	Ventral L	14.49	123	3	2.43902	N
							1	Ventral R	18.434	111	0	0	N
							2	Ventral R	20.066	68	4	5.88235	Y
							3	Ventral R	15.64	108	4	3.7037	N
							4	Ventral R	16.514	151	1	0.662252	N
									18.3302	3181	43	1.35178
											N	28
							Cd74 EAE score>0 #6 (score 3.5)
							Section	Region	Mean tdT	Total Olig2+	Total tdT+Olig2+	%tdT+Olig2+	Lesion?		lesion	nonlesion
							1	Center	27.315	133	3	2.25564	Y	DP	12	6
							2	Center						Olig2	1023	706
							3	Center	26.92	135	1	0.740741	N		1.17302	0.849858
							4	Center	20.66	166	1	0.60241	N	N	12	9
							1	Dorsal L	18.504	61	0	0	N
							2	Dorsal L	19.3	46	0	0	N
							3	Dorsal L	30.449	51	0	0	Y
							4	Dorsal L	19.379	73	1	1.36986	N
							1	Dorsal R	23.105	72	0	0	Y
							2	Dorsal R	24.405	40	1	2.5
							3	Dorsal R	28.592	73	3	4.10959	Y
							4	Dorsal R	20.628	56	0	0	Y
							1	Lateral L	20.643	58	0	0	Y
							2	Lateral L	18.272	92	3	3.26087	Y
							3	Lateral L	21.052	73	2	2.73973
							4	Lateral L	18.681	70	3	4.28571	Y
							1	Lateral R	19.541	50	1	2	N
							2	Lateral R
							3	Lateral R	17.945	65	2	3.07692	N
							4	Lateral R	17.397	81	0	0	Y
							1	Ventral L
							2	Ventral L	27.558	71	0	0	N
							3	Ventral L	26.374	39	0	0	N
							4	Ventral L	21.316	156	0	0	Y
							1	Ventral R
							2	Ventral R
							3	Ventral R	19.363	63	0	0	Y
							4	Ventral R	20.413	118	0	0	Y
									22.0788	1842	21	1.14007
											N	23
							Cd74 EAE score>0 #7 (score 3 ataxic)
							Section	Region	Mean tdT	Total Olig2+	Total tdT+Olig2+	%tdT+Olig2+	Lesion?		lesion	nonlesion
							1	Center	9.447	58	1	1.72414	N	DP	1	1
							2	Center						Olig2	773	568
							3	Center							0.129366	0.176056
							4	Center	10.483	86	0	0	N	N	12	8
							1	Dorsal L	9.98	33	0	0	Y
							2	Dorsal L
							3	Dorsal L	7.594	83	0	0	N
							4	Dorsal L	12.089	47	0	0	Y
							1	Dorsal R	8.985	33	0	0	Y
							2	Dorsal R
							3	Dorsal R	8.662	73	0	0	N
							4	Dorsal R	11.146	37	0	0	Y
							1	Lateral L	8.075	47	0	0	N
							2	Lateral L
							3	Lateral L	7.867	66	0	0	N
							4	Lateral L	10.066	114	1	0.877193	Y
							1	Lateral R	8.059	58	0	0	Y
							2	Lateral R
							3	Lateral R	9.353	86	0	0	Y
							4	Lateral R	9.349	66	0	0	Y
							1	Ventral L	9.133	78	0	0	N
							2	Ventral L
							3	Ventral L	8.625	65	0	0	Y
							4	Ventral L	8.581	84	0	0	Y
							1	Ventral R	9.159	98	0	0	Y
							2	Ventral R
							3	Ventral R	8.951	52	0	0	Y
							4	Ventral R	8.823	77	0	0	N
									9.22135	1341	2	0.149142
											N	20
							Cd74 EAE score>0 #8 (score 2.5 ataxic)
							Section	Region	Mean tdT	Total Olig2+	Total tdT+Olig2+	%tdT+Olig2+	Lesion?		lesion	nonlesion
							1	Center	13.196	127	0	0	N	DP	3	6
							2	Center	10.065	119	0	0	Y	Olig2	1234	2241
							3	Center	10.367	58	1	1.72414	N		0.243112	0.267738
							4	Center	10.223	185	0	0	N	N	10	18
							1	Dorsal L	10.059	169	0	0	Y
							2	Dorsal L	8.851	144	0	0	Y
							3	Dorsal L	11.942	97	2	2.06186	Y
							4	Dorsal L	11.513	149	0	0	N
							1	Dorsal R	10.608	102	1	0.980392	Y
							2	Dorsal R	8.986	118	0	0	Y
							3	Dorsal R	13.402	127	0	0	Y
							4	Dorsal R	11.493	115	0	0	N
							1	Lateral L	11.409	166	0	0	N
							2	Lateral L	7.98	162	1	0.617284	N
							3	Lateral L	8.614	69	0	0	N
							4	Lateral L	9.031	187	0	0	N
							1	Lateral R	11.049	141	0	0	N
							2	Lateral R	9.131	127	0	0	Y
							3	Lateral R	17.723	151	0	0	N
							4	Lateral R	9.085	104	1	0.961538	N
							1	Ventral L	13.133	128	0	0	Y
							2	Ventral L	10.023	103	0	0	Y
							3	Ventral L	9.397	79	1	1.26582	N
							4	Ventral L	8.707	122	0	0	N
							1	Ventral R	11.321	128	0	0	N
							2	Ventral R	9.567	123	0	0	N
							3	Ventral R	9.113	85	0	0	N
							4	Ventral R	7.725	90	2	2.22222	N
									10.4898	3475	9	0.258993
											N	28
							Cd74 EAE score>0 #9 (score 2)
							Section	Region	Mean tdT	Total Olig2+	Total tdT+Olig2+	%tdT+Olig2+	Lesion?		lesion	nonlesion
							1	Center						DP	2	3
							2	Center	8.354	126	1	0.793651	N	Olig2	575	2175
							3	Center	8.223	146	0	0	N		0.347826	0.137931
							4	Center	8.218	155	0	0	N	N	5	15
							1	Dorsal L
							2	Dorsal L	6.715	108	2	1.85185	Y
							3	Dorsal L
							4	Dorsal L	8.356	146	0	0	Y
							1	Dorsal R
							2	Dorsal R	7.954	112	0	0	Y
							3	Dorsal R	10.35	104	0	0	Y
							4	Dorsal R	8.203	105	0	0	Y
							1	Lateral L
							2	Lateral L	6.731	197	0	0	N
							3	Lateral L	7.207	172	0	0	N
							4	Lateral L	7.57	183	0	0	N
							1	Lateral R
							2	Lateral R	7.337	107	1	0.934579	N
							3	Lateral R	7.165	199	0	0	N
							4	Lateral R	7.41	100	1	1	N
							1	Ventral L
							2	Ventral L	8.118	127	0	0	N
							3	Ventral L	6.744	110	0	0	N
							4	Ventral L	8.012	120	0	0	N
							1	Ventral R
							2	Ventral R	7.989	141	0	0	N
							3	Ventral R	7.09	123	0	0	N
							4	Ventral R	8.194	169	0	0	N
									7.797	2750	5	0.181818
											N	20
							CD74 EAE score>0 #10 (score 1.5)
							Section	Region	Mean tdT	Total Olig2+	Total tdT+Olig2+	%tdT+Olig2+	Lesion?		lesion	nonlesion
							1	Center	8.293	262	0	0	N	DP	1	1
							2	Center	9.4	199	0	0	N	Olig2	1113	2947
							3	Center	9.271	229	0	0	N	Av	0.0898473	0.0339328
							4	Center	8.521	245	0	0	N	N	8	19
							1	Dorsal L	6.777	111	1	0.900901	Y
							2	Dorsal L	8.277	70	0	0	N
							3	Dorsal L	7.355	133	0	0	Y
							4	Dorsal L	7.762	135	0	0	Y
							1	Dorsal R	7.168	169	0	0	Y
							2	Dorsal R	8.717	169	0	0	N
							3	Dorsal R	8.546	158	0	0	Y
							4	Dorsal R	8.529	163	0	0	Y
							1	Lateral L	7.393	189	0	0	N
							2	Lateral L	9.253	138	0	0	Y
							3	Lateral L	7.613	129	0	0	N
							4	Lateral L
							1	Lateral R	7.87	238	0	0	N
							2	Lateral R	9.499	179	0	0	N
							3	Lateral R	9.631	129	0	0	N
							4	Lateral R	8.049	183	1	0.546448	N
							1	Ventral L	9.383	143	0	0	N
							2	Ventral L	9.768	110	0	0	N
							3	Ventral L	9.643	95	0	0	N
							4	Ventral L	7.69	113	0	0	N
							1	Ventral R	9.246	106	0	0	Y
							2	Ventral R	10.052	85	0	0	N
							3	Ventral R	9.749	92	0	0	N
							4	Ventral R	8.218	88	0	0	N
									8.58048	4060	2	0.0492611
											N	27

## Sheet: B2M SC EAE PDGFR
B2m baseline						B2m EAE score 0						B2m EAE score>0
B2m baseline #1						B2m EAE score 0 #1- mean tdT 15.6						B2m EAE score> 0 #3 (score 2)- mean tdT 25.7
Section	Region	TdT+Olig2+	PDGFRa+TdT+Olig2+	%PDGFRa+		Section	Region	tdT+Olig2+	PDGFRa+tdT+Olig2+	%PDGFRa+		Section	Region	tdT+Olig2+	PDGFRa+tdT+Olig2+	%PDGFRa+
1	Center					1	Center					1	Center	6	0	0
2	Center					2	Center					2	Center	2	0	0
3	Center					3	Center					3	Center
4	Center					4	Center	1	1	100		4	Center	1	0	0
1	Dorsal L					1	Dorsal L					1	Dorsal L	7	1	14.2857
2	Dorsal L					2	Dorsal L					2	Dorsal L	5	1	20
3	Dorsal L					3	Dorsal L					3	Dorsal L	7	0	0
4	Dorsal L					4	Dorsal L	2	0	0		4	Dorsal L	7	2	28.5714
1	Dorsal R	1	0	0		1	Dorsal R	4	0	0		1	Dorsal R	5	2	40
2	Dorsal R	1	1	100		2	Dorsal R					2	Dorsal R	7	0	0
3	Dorsal R					3	Dorsal R					3	Dorsal R	1	0	0
4	Dorsal R					4	Dorsal R	4	1	25		4	Dorsal R	8	0	0
1	Lateral L	2	0	0		1	Lateral L	4	0	0		1	Lateral L	3	0	0
2	Lateral L	5	0	0		2	Lateral L					2	Lateral L
3	Lateral L	1	0	0		3	Lateral L	1	1	100		3	Lateral L	5	0	0
4	Lateral L	4	0	0		4	Lateral L	2	1	50		4	Lateral L	4	0	0
1	Lateral R	3	0	0		1	Lateral R					1	Lateral R
2	Lateral R	2	0	0		2	Lateral R					2	Lateral R	5	2	40
3	Lateral R					3	Lateral R	2	0	0		3	Lateral R	4	0	0
4	Lateral R	1	0	0		4	Lateral R	4	0	0		4	Lateral R
1	Ventral L	6	0	0		1	Ventral L	2	1	50		1	Ventral L	6	0	0
2	Ventral L	3	1	33.3333		2	Ventral L	2	1	50		2	Ventral L	21	0	0
3	Ventral L	1	0	0		3	Ventral L	1	0	0		3	Ventral L	2	1	50
4	Ventral L	9	1	11.1111		4	Ventral L					4	Ventral L	4	0	0
1	Ventral R					1	Ventral R					1	Ventral R
2	Ventral R					2	Ventral R	4	2	50		2	Ventral R	4	0	0
3	Ventral R	5	0	0		3	Ventral R	1	0	0		3	Ventral R	3	2	66.6667
4	Ventral R	2	0	0		4	Ventral R					4	Ventral R	2	0	0
		46	3	6.52174				34	8	23.5294				119	11	9.2437
			N	15					N	14					N	23
B2m baseline #2						B2m EAE score 0 #2- mean tdT 15.7						B2m EAE score> 0 #5 (score 2.5)- mean tdT 40.4
Section	Region	TdT+Olig2+	PDGFRa+TdT+Olig2+	%PDGFRa+		Section	Region	tdT+Olig2+	PDGFRa+tdT+Olig2+	%PDGFRa+		Section	Region	tdT+Olig2+	PDGFRa+tdT+Olig2+	%PDGFRa+
1	Center					1	Center					1	Center
2	Center					2	Center					2	Center	64	1	1.5625
3	Center					3	Center	2	0	0		3	Center	52	0	0
4	Center					4	Center	2	1	50		4	Center	58	0	0
1	Dorsal L					1	Dorsal L	6	0	0		1	Dorsal L
2	Dorsal L					2	Dorsal L	2	0	0		2	Dorsal L	59	0	0
3	Dorsal L					3	Dorsal L	5	1	20		3	Dorsal L	27	0	0
4	Dorsal L					4	Dorsal L	4	0	0		4	Dorsal L
1	Dorsal R	1	1	100		1	Dorsal R	1	1	100		1	Dorsal R
2	Dorsal R					2	Dorsal R	4	0	0		2	Dorsal R	61	1	1.63934
3	Dorsal R					3	Dorsal R	10	0	0		3	Dorsal R	20	0	0
4	Dorsal R					4	Dorsal R	3	2	66.6667		4	Dorsal R
1	Lateral L					1	Lateral L	2	0	0		1	Lateral L
2	Lateral L	2	0	0		2	Lateral L					2	Lateral L	43	0	0
3	Lateral L	3	1	33.3333		3	Lateral L	2	0	0		3	Lateral L	34	0	0
4	Lateral L	15	0	0		4	Lateral L					4	Lateral L
1	Lateral R	4	0	0		1	Lateral R	2	0	0		1	Lateral R
2	Lateral R					2	Lateral R	7	0	0		2	Lateral R	35	3	8.57143
3	Lateral R					3	Lateral R	7	0	0		3	Lateral R	20	0	0
4	Lateral R	4	0	0		4	Lateral R	5	2	40		4	Lateral R
1	Ventral L	7	0	0		1	Ventral L	2	0	0		1	Ventral L
2	Ventral L	3	2	66.6667		2	Ventral L					2	Ventral L	37	1	2.7027
3	Ventral L	8	0	0		3	Ventral L	3	0	0		3	Ventral L	32	1	3.125
4	Ventral L	2	0	0		4	Ventral L					4	Ventral L	30	1	3.33333
1	Ventral R	6	0	0		1	Ventral R					1	Ventral R
2	Ventral R					2	Ventral R					2	Ventral R	40	1	2.5
3	Ventral R	5	0	0		3	Ventral R					3	Ventral R	24	0	0
4	Ventral R	2	0	0		4	Ventral R	2	0	0		4	Ventral R	39	1	2.5641
		62	4	6.45161				71	7	9.85915				675	10	1.48148
			N	13					N	19					N	17
						B2m EAE score 0 #4						B2m EAE score> 0 #6 (score 3)- mean tdT 35.3
B2m baseline #3
						Section	Region	tdT+Olig2+	PDGFRa+tdT+Olig2+	%PDGFRa+		Section	Region	tdT+Olig2+	PDGFRa+tdT+Olig2+	%PDGFRa+
Section	Region	TdT+Olig2+	PDGFRa+TdT+Olig2+	%PDGFRa+		1	Center	2	2	100		1	Center	3	1	33.3333
1	Center					2	Center					2	Center	4	0	0
2	Center					3	Center					3	Center	7	1	14.2857
3	Center					4	Center	1	0	0		4	Center	3	0	0
4	Center					1	Dorsal L	4	1	25		1	Dorsal L	7	0	0
1	Dorsal L	2	0	0		2	Dorsal L	3	0	0		2	Dorsal L
2	Dorsal L	2	0	0		3	Dorsal L					3	Dorsal L
3	Dorsal L					4	Dorsal L	3	1	33.3333		4	Dorsal L
4	Dorsal L					1	Dorsal R	3	1	33.3333		1	Dorsal R	12	1	8.33333
1	Dorsal R	2	1	50		2	Dorsal R	1	0	0		2	Dorsal R	11	1	9.09091
2	Dorsal R	5	0	0		3	Dorsal R	1	0	0		3	Dorsal R	24	0	0
3	Dorsal R	3	0	0		4	Dorsal R					4	Dorsal R	8	2	25
4	Dorsal R	2	1	50		1	Lateral L	4	0	0		1	Lateral L	3	0	0
1	Lateral L	3	0	0		2	Lateral L	5	0	0		2	Lateral L
2	Lateral L	4	2	50		3	Lateral L	1	0	0		3	Lateral L
3	Lateral L					4	Lateral L	5	1	20		4	Lateral L
4	Lateral L	4	0	0		1	Lateral R	3	0	0		1	Lateral R	1	1
1	Lateral R	2	0	0		2	Lateral R	11	0	0		2	Lateral R	15	0	0
2	Lateral R	7	0	0		3	Lateral R	6	0	0		3	Lateral R	14	0	0
3	Lateral R	4	0	0		4	Lateral R	6	1	16.6667		4	Lateral R	7	0	0
4	Lateral R	3	0	0		1	Ventral L	1	0	0		1	Ventral L	4	0	0
1	Ventral L	9	0	0		2	Ventral L	9	0	0		2	Ventral L	3	0	0
2	Ventral L	2	1	50		3	Ventral L	2	0	0		3	Ventral L	2	0	0
3	Ventral L	5	0	0		4	Ventral L	1	0	0		4	Ventral L	7	1	14.2857
4	Ventral L	4	0	0		1	Ventral R	11	0	0		1	Ventral R	4	2	50
1	Ventral R	11	0	0		2	Ventral R	6	0	0		2	Ventral R
2	Ventral R					3	Ventral R	9	0	0		3	Ventral R	14	3	21.4286
3	Ventral R	5	0	0		4	Ventral R	9	0	0		4	Ventral R	3	0	0
4	Ventral R	7	0	0				107	7	6.54206				156	13	8.33333
		86	5	5.81395					N	24					N	20
			N	20
						B2m EAE score 0 #3- mean tdT 23.8						B2m EAE score> 0 #4 (score 2)- mean tdT 33.6
						Section	Region	tdT+Olig2+	PDGFRa+tdT+Olig2+	%PDGFRa+		Section	Region	tdT+Olig2+	PDGFRa+tdT+Olig2+	%PDGFRa+
						1	Center					1	Center
						2	Center					2	Center	2	0	0
						3	Center					3	Center
						4	Center					4	Center
						1	Dorsal L	2	0	0		1	Dorsal L
						2	Dorsal L	1	0	0		2	Dorsal L
						3	Dorsal L	2	1	50		3	Dorsal L	2	0	0
						4	Dorsal L	1	0	0		4	Dorsal L
						1	Dorsal R					1	Dorsal R
						2	Dorsal R					2	Dorsal R	2	1	50
						3	Dorsal R					3	Dorsal R
						4	Dorsal R					4	Dorsal R	1	0	0
						1	Lateral L	5	0	0		1	Lateral L
						2	Lateral L	2	0	0		2	Lateral L	3	0	0
						3	Lateral L					3	Lateral L	2	0	0
						4	Lateral L	6	0	0		4	Lateral L
						1	Lateral R					1	Lateral R
						2	Lateral R					2	Lateral R	2	0	0
						3	Lateral R					3	Lateral R
						4	Lateral R					4	Lateral R
						1	Ventral L	1	0	0		1	Ventral L
						2	Ventral L	1	0	0		2	Ventral L	4	1	25
						3	Ventral L					3	Ventral L
						4	Ventral L	1	0	0		4	Ventral L
						1	Ventral R	3	1	33.3333		1	Ventral R
						2	Ventral R					2	Ventral R	5	4	80
						3	Ventral R					3	Ventral R
						4	Ventral R	2	0	0		4	Ventral R
								27	2	7.40741				23	6	26.087
									N	12					N	9
												B2m EAE score> 0 #7 (score 3)- mean tdT 34.4
												Section	Region	tdT+Olig2+	PDGFRa+tdT+Olig2+	%PDGFRa+
												1	Center	4	2	50
												2	Center	2	0	0
												3	Center	2	0	0
												4	Center	3	0	0
												1	Dorsal L	9	3	33.3333
												2	Dorsal L	2	1	50
												3	Dorsal L	13	1	7.69231
												4	Dorsal L	11	1	9.09091
												1	Dorsal R	13	2	15.3846
												2	Dorsal R
												3	Dorsal R	12	0	0
												4	Dorsal R	3	1	33.3333
												1	Lateral L	3	2	66.6667
												2	Lateral L	3	1	33.3333
												3	Lateral L	10	2	20
												4	Lateral L	10	3	30
												1	Lateral R	9	2	22.2222
												2	Lateral R	3	0	0
												3	Lateral R	6	2	33.3333
												4	Lateral R	6	0	0
												1	Ventral L
												2	Ventral L	11	3	27.2727
												3	Ventral L	8	3	37.5
												4	Ventral L	4	0	0
												1	Ventral R
												2	Ventral R	5	1	20
												3	Ventral R	6	0	0
												4	Ventral R	9	2	22.2222
														167	32	19.1617
															N	25
												B2m EAE score> 0 #2 (score 3.5)- mean tdT 31
												Section	Region	tdT+Olig2+	PDGFRa+tdT+Olig2+	%PDGFRa+
												1	Center
												2	Center	9	0	0
												3	Center	8	2	25
												4	Center	3	2	66.6667
												1	Dorsal L	2	1	50
												2	Dorsal L	6	2	33.3333
												3	Dorsal L	6	0	0
												4	Dorsal L	3	1	33.3333
												1	Dorsal R	1	0	0
												2	Dorsal R	4	0	0
												3	Dorsal R
												4	Dorsal R	6	0	0
												1	Lateral L	2	1	50
												2	Lateral L
												3	Lateral L	5	1	20
												4	Lateral L
												1	Lateral R	3	1	33.3333
												2	Lateral R	1	0	0
												3	Lateral R	4	0	0
												4	Lateral R	4	0	0
												1	Ventral L	2	1	50
												2	Ventral L	3	1	33.3333
												3	Ventral L	9	1	11.1111
												4	Ventral L	7	1	14.2857
												1	Ventral R
												2	Ventral R	1	1	100
												3	Ventral R	21	1	4.7619
												4	Ventral R	4	1	25
														114	18	15.7895
															N	23
												B2m EAE score> 0 #8 (score 3)- mean tdT 51.3
												Section	Region	tdT+Olig2+	PDGFRa+tdT+Olig2+	%PDGFRa+
												1	Center	3	2	66.6667
												2	Center	4	1	25
												3	Center	3	0	0
												4	Center	2	0	0
												1	Dorsal L
												2	Dorsal L	4	0	0
												3	Dorsal L	11	0	0
												4	Dorsal L
												1	Dorsal R	2	1	50
												2	Dorsal R	6	1	16.6667
												3	Dorsal R	19	1	5.26316
												4	Dorsal R	7	1	14.2857
												1	Lateral L
												2	Lateral L	3	0	0
												3	Lateral L	8	0	0
												4	Lateral L	10	2	20
												1	Lateral R	1	0	0
												2	Lateral R	6	0	0
												3	Lateral R	3	0	0
												4	Lateral R	1	0	0
												1	Ventral L	7	1	14.2857
												2	Ventral L	10	0	0
												3	Ventral L	13	0	0
												4	Ventral L	7	0	0
												1	Ventral R	12	0	0
												2	Ventral R	16	0	0
												3	Ventral R	17	0	0
												4	Ventral R	6	1	16.6667
														181	11	6.07735
															N	25
												B2m EAE score> 0 #9 (score 3.5)- mean tdT 39.4
												Section	Region	tdT+Olig2+	PDGFRa+tdT+Olig2+	%PDGFRa+
												1	Center	12	0	0
												2	Center	5	0	0
												3	Center	2	0	0
												4	Center	16	1	6.25
												1	Dorsal L	10	1	10
												2	Dorsal L	8	1	12.5
												3	Dorsal L	3	0	0
												4	Dorsal L	8	1	12.5
												1	Dorsal R	11	0	0
												2	Dorsal R	9	1	11.1111
												3	Dorsal R	10	3	30
												4	Dorsal R	11	2	18.1818
												1	Lateral L	5	0	0
												2	Lateral L	15	1	6.66667
												3	Lateral L	9	0	0
												4	Lateral L	8	0	0
												1	Lateral R	8	0	0
												2	Lateral R	14	2	14.2857
												3	Lateral R	9	5	55.5556
												4	Lateral R	14	2	14.2857
												1	Ventral L	9	0	0
												2	Ventral L	12	2	16.6667
												3	Ventral L	6	0	0
												4	Ventral L	11	1	9.09091
												1	Ventral R	3	0	0
												2	Ventral R	1	0	0
												3	Ventral R	2	1	50
												4	Ventral R	2	0	0
														233	24	10.3004
															N	28

## Sheet: CD74 SC EAE PDGFR
Cd74 EAE score>0
Cd74 EAE score>0 #1 (score 2.5)- mean tdT 14.8
Section	Region	tdT+Olig2+	PDGFRa+tdT+Olig2+	%PDGFRa+
1	Center	1	0	0
2	Center
3	Center
4	Center
1	Dorsal L
2	Dorsal L
3	Dorsal L	2	1	50
4	Dorsal L
1	Dorsal R	1	0	0
2	Dorsal R
3	Dorsal R	1	1	100
4	Dorsal R
1	Lateral L
2	Lateral L	3	0	0
3	Lateral L	1	0	0
4	Lateral L	2	1	50
1	Lateral R
2	Lateral R
3	Lateral R
4	Lateral R
1	Ventral L
2	Ventral L
3	Ventral L	4	0	0
4	Ventral L
1	Ventral R
2	Ventral R
3	Ventral R	1	0	0
4	Ventral R
		16	3	18.75
			N	9
Cd74 EAE score>0 #3 (score 3)- mean tdT 10.8
Section	Region	tdT+Olig2+	PDGFRa+tdT+Olig2+	%PDGFRa+
1	Center	2	0	0
2	Center
3	Center	1	0	0
4	Center	2	1	50
1	Dorsal L
2	Dorsal L	1	0	0
3	Dorsal L
4	Dorsal L	1	1	100
1	Dorsal R	2	1	50
2	Dorsal R	1	0	0
3	Dorsal R	1	1	100
4	Dorsal R
1	Lateral L	1	0	0
2	Lateral L	1	0	0
3	Lateral L
4	Lateral L	1	0	0
1	Lateral R	1	0	0
2	Lateral R
3	Lateral R	1	0	0
4	Lateral R
1	Ventral L
2	Ventral L	1	0	0
3	Ventral L	1	0	0
4	Ventral L	1	1	100
1	Ventral R	2	0	0
2	Ventral R
3	Ventral R	1	0	0
4	Ventral R	1	0	0
		23	5	21.7391
			N	19
Cd74 EAE score>0 #4 (score 3)- mean tdT 10.0
Section	Region	tdT+Olig2+	PDGFRa+tdT+Olig2+	%PDGFRa+
1	Center
2	Center	1	0	0
3	Center
4	Center	1	0	0
1	Dorsal L
2	Dorsal L
3	Dorsal L
4	Dorsal L
1	Dorsal R
2	Dorsal R	1	0	0
3	Dorsal R
4	Dorsal R
1	Lateral L
2	Lateral L	1	0	0
3	Lateral L
4	Lateral L
1	Lateral R
2	Lateral R	1	0	0
3	Lateral R	1	0	0
4	Lateral R
1	Ventral L
2	Ventral L	2	0	0
3	Ventral L
4	Ventral L
1	Ventral R
2	Ventral R
3	Ventral R
4	Ventral R	1	0	0
		9	0	0
			N	8
Cd74 EAE score>0 #9 (score 2)- mean tdT 7.8
Section	Region	tdT+Olig2+	PDGFRa+tdT+Olig2+	%PDGFRa+
1	Center	0
2	Center	0
3	Center	1	1	100
4	Center	3	1	33.3333
1	Dorsal L	1	0	0
2	Dorsal L	0
3	Dorsal L	0
4	Dorsal L	1	0	0
1	Dorsal R	0
2	Dorsal R
3	Dorsal R	1	0	0
4	Dorsal R	0
1	Lateral L	1	0	0
2	Lateral L	0
3	Lateral L	0
4	Lateral L	0
1	Lateral R	0
2	Lateral R
3	Lateral R	0
4	Lateral R	0
1	Ventral L	0
2	Ventral L	1	0	0
3	Ventral L	0
4	Ventral L	2	1	50
1	Ventral R	0
2	Ventral R	0
3	Ventral R	0
4	Ventral R	1	1	100
		12	4	33.3333
			N	9
Cd74 EAE score>0 #6 (score 3.5)- mean tdT 22.1
Section	Region	tdT+Olig2+	PDGFRa+tdT+Olig2+	%PDGFRa+
1	Center
2	Center	1	1	100
3	Center	1	0	0
4	Center
1	Dorsal L
2	Dorsal L
3	Dorsal L
4	Dorsal L	3	0	0
1	Dorsal R	2	0	0
2	Dorsal R
3	Dorsal R	1	1	100
4	Dorsal R
1	Lateral L	2	0	0
2	Lateral L	1	0	0
3	Lateral L
4	Lateral L	1	0	0
1	Lateral R
2	Lateral R
3	Lateral R
4	Lateral R
1	Ventral L
2	Ventral L	1	1	100
3	Ventral L
4	Ventral L	1	0	0
1	Ventral R
2	Ventral R	2	0	0
3	Ventral R	1	0	0
4	Ventral R
		17	3	17.6471
			N	12
Cd74 EAE score>0 #2 (score 2.5)- mean tdT 20.6
Section	Region	tdT+Olig2+	PDGFRa+tdT+Olig2+	%PDGFRa+
1	Center
2	Center
3	Center
4	Center
1	Dorsal L
2	Dorsal L
3	Dorsal L
4	Dorsal L	1	1	100
1	Dorsal R
2	Dorsal R	1	0	0
3	Dorsal R	1	1	100
4	Dorsal R
1	Lateral L
2	Lateral L
3	Lateral L
4	Lateral L
1	Lateral R
2	Lateral R
3	Lateral R
4	Lateral R
1	Ventral L	1	0	0
2	Ventral L	3	0	0
3	Ventral L	8	0	0
4	Ventral L	2	0	0
1	Ventral R	2	0	0
2	Ventral R	2	0	0
3	Ventral R
4	Ventral R	1	0	0
		22	2	9.09091
			N	10
