# Supplementary material for: MHC class I and MHC class II reporter mice enable analysis of immune oligodendroglia in mouse models of multiple sclerosis
Source: eLife. 2023 Apr 14;12:e82938. doi: 10.7554/eLife.82938 (PMC10181822; doi:10.7554/eLife.82938)
Supplement: Figure 8—figure supplement 1—source data 1. [file elife-82938-fig8-figsupp1-data1.xlsx]

## Sheet: Panel A
Panel A- % tdT+Olig2+ of Olig2+ vs EAE score
B2mtdT Brain			Cd74tdT Brain
All region mean			All region mean
EAE score	%tdT+Olig2+ of Olig2+		EAE score	%tdT+Olig2+ of Olig2+
1.5	1.59		2.5	0.14
2	7.35		2.5	0.12
2	7.35		3	0.18
2.5	13		3	0.75
3	8.03		3	0.51
3	6.34		3.5	0.15
3.5	6.55		3	0.22
3	3.57		2.5	0.66
3.5	1.44		1.5	0
0	0.46		2	1.72
0	0.83		1.5	1.16
0	1.02		0	0
0	1.85		0	0
0	4.43		0	0
Linear Regression			Linear Regression
Best-fit values			Best-fit values
Slope	1.366		Slope	0.09051
Y-intercept	2.216		Y-intercept	0.2197
X-intercept	-1.623		X-intercept	-2.427
1/slope	0.7322		1/slope	11.05
Std. Error			Std. Error
Slope	0.6253		Slope	0.1186
Y-intercept	1.378		Y-intercept	0.2754
95% Confidence Intervals			95% Confidence Intervals
Slope	0.003338 to 2.728		Slope	-0.1679 to 0.3489
Y-intercept	-0.7862 to 5.219		Y-intercept	-0.3804 to 0.8198
X-intercept	-1364 to 0.3303		X-intercept	-infinity to 1.380
Goodness of Fit			Goodness of Fit
R squared	0.2845		R squared	0.04629
Sy.x	3.241		Sy.x	0.5237
Is slope significantly non-zero?			Is slope significantly non-zero?
F	4.771		F	0.5824
DFn, DFd	1, 12		DFn, DFd	1, 12
P value	0.0495		P value	0.4601
Deviation from zero?	Significant		Deviation from zero?	Not Significant
Equation	Y = 1.366*X + 2.216		Equation	Y = 0.09051*X + 0.2197
Data			Data
Number of X values	14		Number of X values	14
Maximum number of Y replicates	1		Maximum number of Y replicates	1
Total number of values	14		Total number of values	14
Number of missing values	0		Number of missing values	0

## Sheet: Panel B
Panel B- regional % tdT+Olig2+ of Olig2+
B2mtdT Brain
corpus
CUP	0	0.12	1.22
EAE	0.74	3.37	7.69	15.38	1.58	0	0.78	0	1.39
AT	3.87	0.31	0	3.18
AT-CUP	22.61	48.68	44.54	3.05	0	6.77
corpus horn
CUP	0.69	0.22	1.55
EAE	0.75	16.54	10.75	15.1	1.12	1.44	2.03	0.37	0
AT	0.15	0.97	1.47	1.72
AT-CUP	16.45	35.84	16.12	3.49	0.23	14.61
SVZ
CUP	0	0	0.83
EAE	2.13	0	5.71	16.67	11.11	0	2.17	9.31	3.13
AT	1.16	0.8	0.31	2.88
AT-CUP	4.31	0	1.26	0	0	8.46
ventral
CUP	0.23	0	0.84
EAE	1.95	5.15	6.08	9.22	18.06	11.11	10.5	3.63	1.21
AT	6.42	2.82	0.54	7.94
AT-CUP	30.32	8.05	8.59	9.6	7.25	33.33
corpus	Mean	SEM	N
CUP	0.446667	0.388215	3
EAE	3.43667	1.69282	9
AT	1.84	0.985013	4
AT-CUP	20.9417	8.73419	6
corpus horn	Mean	SEM	N
CUP	0.82	0.389401	3
EAE	5.34444	2.26147	9
AT	1.0775	0.346251	4
AT-CUP	14.4567	5.1208	6
SVZ	Mean	SEM	N
CUP	0.276667	0.276667	3
EAE	5.58111	1.89775	9
AT	1.2875	0.55868	4
AT-CUP	2.33833	1.40153	6
ventral	Mean	SEM	N
CUP	0.356667	0.250621	3
EAE	7.43444	1.78477	9
AT	4.43	1.68336	4
AT-CUP	16.19	4.96926	6
corpus
Column C	AT-CUP
vs.	vs.
Column B	AT
Mann Whitney test
P value	0.1857
Exact or approximate P value?	Exact
P value summary	ns
Significantly different (P < 0.05)?	No
One- or two-tailed P value?	Two-tailed
Sum of ranks in column B,C	15.50 , 39.50
Mann-Whitney U	5.5
Difference between medians
Median of column B	1.745, n=4
Median of column C	14.69, n=6
Difference: Actual	12.95
Difference: Hodges-Lehmann	12.76
96.19% CI of difference	-0.8200 to 45.50
Exact or approximate CI?	Exact
corpus
Column C	AT-CUP
vs.	vs.
Column A	CUP
Mann Whitney test
P value	0.1071
Exact or approximate P value?	Exact
P value summary	ns
Significantly different (P < 0.05)?	No
One- or two-tailed P value?	Two-tailed
Sum of ranks in column A,C	8.500 , 36.50
Mann-Whitney U	2.5
Difference between medians
Median of column A	0.1200, n=3
Median of column C	14.69, n=6
Difference: Actual	14.57
Difference: Hodges-Lehmann	14.08
95.24% CI of difference	-0.1200 to 48.56
Exact or approximate CI?	Exact
corpus
Column D	EAE
vs.	vs.
Column C	AT-CUP
Mann Whitney test
P value	0.1123
Exact or approximate P value?	Exact
P value summary	ns
Significantly different (P < 0.05)?	No
One- or two-tailed P value?	Two-tailed
Sum of ranks in column C,D	62 , 58
Mann-Whitney U	13
Difference between medians
Median of column C	14.69, n=6
Median of column D	1.390, n=9
Difference: Actual	-13.3
Difference: Hodges-Lehmann	-7
95.04% CI of difference	-43.76 to 0.7400
Exact or approximate CI?	Exact
corpus horn
Column C	AT-CUP
vs.	vs.
Column B	AT
Mann Whitney test
P value	0.0667
Exact or approximate P value?	Exact
P value summary	ns
Significantly different (P < 0.05)?	No
One- or two-tailed P value?	Two-tailed
Sum of ranks in column B,C	13 , 42
Mann-Whitney U	3
Difference between medians
Median of column B	1.220, n=4
Median of column C	15.37, n=6
Difference: Actual	14.15
Difference: Hodges-Lehmann	14.43
96.19% CI of difference	-0.7400 to 34.37
Exact or approximate CI?	Exact
corpus horn
Column C	AT-CUP
vs.	vs.
Column A	CUP
Mann Whitney test
P value	0.0952
Exact or approximate P value?	Exact
P value summary	ns
Significantly different (P < 0.05)?	No
One- or two-tailed P value?	Two-tailed
Sum of ranks in column A,C	8 , 37
Mann-Whitney U	2
Difference between medians
Median of column A	0.6900, n=3
Median of column C	15.37, n=6
Difference: Actual	14.68
Difference: Hodges-Lehmann	14.48
95.24% CI of difference	-0.4600 to 35.15
Exact or approximate CI?	Exact
corpus horn
Column D	EAE
vs.	vs.
Column C	AT-CUP
Mann Whitney test
P value	0.181
Exact or approximate P value?	Exact
P value summary	ns
Significantly different (P < 0.05)?	No
One- or two-tailed P value?	Two-tailed
Sum of ranks in column C,D	60 , 60
Mann-Whitney U	15
Difference between medians
Median of column C	15.37, n=6
Median of column D	1.440, n=9
Difference: Actual	-13.93
Difference: Hodges-Lehmann	-9.14
95.04% CI of difference	-16.12 to 0.5200
Exact or approximate CI?	Exact
ventral
Column C	AT-CUP
vs.	vs.
Column B	AT
Mann Whitney test
P value	0.019
Exact or approximate P value?	Exact
P value summary	*
Significantly different (P < 0.05)?	Yes
One- or two-tailed P value?	Two-tailed
Sum of ranks in column B,C	11 , 44
Mann-Whitney U	1
Difference between medians
Median of column B	4.620, n=4
Median of column C	9.095, n=6
Difference: Actual	4.475
Difference: Hodges-Lehmann	6.745
96.19% CI of difference	0.6500 to 29.78
Exact or approximate CI?	Exact
ventral
Column C	AT-CUP
vs.	vs.
Column A	CUP
Mann Whitney test
P value	0.0238
Exact or approximate P value?	Exact
P value summary	*
Significantly different (P < 0.05)?	Yes
One- or two-tailed P value?	Two-tailed
Sum of ranks in column A,C	6 , 39
Mann-Whitney U	0
Difference between medians
Median of column A	0.2300, n=3
Median of column C	9.095, n=6
Difference: Actual	8.865
Difference: Hodges-Lehmann	8.675
95.24% CI of difference	7.020 to 33.10
Exact or approximate CI?	Exact
ventral
Column D	EAE
vs.	vs.
Column C	AT-CUP
Mann Whitney test
P value	0.181
Exact or approximate P value?	Exact
P value summary	ns
Significantly different (P < 0.05)?	No
One- or two-tailed P value?	Two-tailed
Sum of ranks in column C,D	60 , 60
Mann-Whitney U	15
Difference between medians
Median of column C	9.095, n=6
Median of column D	6.080, n=9
Difference: Actual	-3.015
Difference: Hodges-Lehmann	-5.13
95.04% CI of difference	-24.11 to 1.910
Exact or approximate CI?	Exact

## Sheet: Panel C
Panel C- regional % tdT+Olig2+ of Olig2+
Cd74tdT Brain
corpus
CUP	0	0	0
EAE	0.38	0	0	1.59	0.79	0.37	0.33	1.75	0	3.23	0
AT	0.27	0	0	0	0	0
AT-CUP	2.01	9.94	0.75	0.14	0	1.65	0.98	0.77
corpus horn
CUP	0	0	0
EAE	0.19	0.24	0.19	0	1.26	0	0.69	1.44	0	2.36	1.66
AT	0.26	0.2	0	0	0.97	0
AT-CUP	1.4	5.49	0.6	0.2	0.33	0.19	0.28	0.58
SVZ
CUP	0	0	0
EAE	0	0.72	0	5.45	0.66	0	0	0.75	0	1.3	0.94
AT	0.68	0	0	0.18	0.11	0.44
AT-CUP	0.78	0	0	1.1	0	0	0	0
ventral
CUP	0	0	0
EAE	0	0	0.32	0	0	0.21	0	0.19	0	0.88	1.4
AT	0	0	0	0	0	0
AT-CUP	0.31	0	0.1	0.07	0.31	0	0	0.31
corpus	Mean	SEM	N
CUP	0	0	3
EAE	0.767273	0.309868	11
AT	0.045	0.045	6
AT-CUP	2.03	1.15522	8
corpus horn	Mean	SEM	N
CUP	0	0	3
EAE	0.73	0.247357	11
AT	0.238333	0.153589	6
AT-CUP	1.13375	0.637753	8
SVZ	Mean	SEM	N
CUP	0	0	3
EAE	0.892727	0.476979	11
AT	0.235	0.110928	6
AT-CUP	0.235	0.156787	8
ventral	Mean	SEM	N
CUP	0	0	3
EAE	0.272727	0.138131	11
AT	0	0	6
AT-CUP	0.1375	0.0520902	8
corpus
Column C	AT-CUP
vs.	vs.
Column B	AT
Mann Whitney test
P value	0.0073
Exact or approximate P value?	Exact
P value summary	**
Significantly different (P < 0.05)?	Yes
One- or two-tailed P value?	Two-tailed
Sum of ranks in column B,C	25.50 , 79.50
Mann-Whitney U	4.5
Difference between medians
Median of column B	0.000, n=6
Median of column C	0.8750, n=8
Difference: Actual	0.875
Difference: Hodges-Lehmann	0.77
95.74% CI of difference	0.1400 to 2.010
Exact or approximate CI?	Exact
corpus
Column C	AT-CUP
vs.	vs.
Column A	CUP
Mann Whitney test
P value	0.0364
Exact or approximate P value?	Exact
P value summary	*
Significantly different (P < 0.05)?	Yes
One- or two-tailed P value?	Two-tailed
Sum of ranks in column A,C	7.500 , 58.50
Mann-Whitney U	1.5
Difference between medians
Median of column A	0.000, n=3
Median of column C	0.8750, n=8
Difference: Actual	0.875
Difference: Hodges-Lehmann	0.875
95.15% CI of difference	0.000 to 9.940
Exact or approximate CI?	Exact
corpus
Column D	EAE
vs.	vs.
Column C	AT-CUP
Mann Whitney test
P value	0.2674
Exact or approximate P value?	Exact
P value summary	ns
Significantly different (P < 0.05)?	No
One- or two-tailed P value?	Two-tailed
Sum of ranks in column C,D	94 , 96
Mann-Whitney U	30
Difference between medians
Median of column C	0.8750, n=8
Median of column D	0.3700, n=11
Difference: Actual	-0.505
Difference: Hodges-Lehmann	-0.42
95.91% CI of difference	-1.650 to 0.3800
Exact or approximate CI?	Exact
corpus horn
Column C	AT-CUP
vs.	vs.
Column B	AT
Mann Whitney test
P value	0.0639
Exact or approximate P value?	Exact
P value summary	ns
Significantly different (P < 0.05)?	No
One- or two-tailed P value?	Two-tailed
Sum of ranks in column B,C	30.50 , 74.50
Mann-Whitney U	9.5
Difference between medians
Median of column B	0.1000, n=6
Median of column C	0.4550, n=8
Difference: Actual	0.355
Difference: Hodges-Lehmann	0.325
95.74% CI of difference	-0.01000 to 1.400
Exact or approximate CI?	Exact
corpus horn
Column C	AT-CUP
vs.	vs.
Column A	CUP
Mann Whitney test
P value	0.0121
Exact or approximate P value?	Exact
P value summary	*
Significantly different (P < 0.05)?	Yes
One- or two-tailed P value?	Two-tailed
Sum of ranks in column A,C	6 , 60
Mann-Whitney U	0
Difference between medians
Median of column A	0.000, n=3
Median of column C	0.4550, n=8
Difference: Actual	0.455
Difference: Hodges-Lehmann	0.455
95.15% CI of difference	0.1900 to 5.490
Exact or approximate CI?	Exact
corpus horn
Column D	EAE
vs.	vs.
Column C	AT-CUP
Mann Whitney test
P value	0.5431
Exact or approximate P value?	Exact
P value summary	ns
Significantly different (P < 0.05)?	No
One- or two-tailed P value?	Two-tailed
Sum of ranks in column C,D	88 , 102
Mann-Whitney U	36
Difference between medians
Median of column C	0.4550, n=8
Median of column D	0.2400, n=11
Difference: Actual	-0.215
Difference: Hodges-Lehmann	-0.14
95.91% CI of difference	-0.6000 to 0.9600
Exact or approximate CI?	Exact
ventral
Column C	AT-CUP
vs.	vs.
Column B	AT
Mann Whitney test
P value	0.043
Exact or approximate P value?	Exact
P value summary	*
Significantly different (P < 0.05)?	Yes
One- or two-tailed P value?	Two-tailed
Sum of ranks in column B,C	30 , 75
Mann-Whitney U	9
Difference between medians
Median of column B	0.000, n=6
Median of column C	0.08500, n=8
Difference: Actual	0.085
Difference: Hodges-Lehmann	0.085
95.74% CI of difference	0.000 to 0.3100
Exact or approximate CI?	Exact
ventral
Column C	AT-CUP
vs.	vs.
Column A	CUP
Mann Whitney test
P value	0.1636
Exact or approximate P value?	Exact
P value summary	ns
Significantly different (P < 0.05)?	No
One- or two-tailed P value?	Two-tailed
Sum of ranks in column A,C	10.50 , 55.50
Mann-Whitney U	4.5
Difference between medians
Median of column A	0.000, n=3
Median of column C	0.08500, n=8
Difference: Actual	0.085
Difference: Hodges-Lehmann	0.085
95.15% CI of difference	0.000 to 0.3100
Exact or approximate CI?	Exact
ventral
Column D	EAE
vs.	vs.
Column C	AT-CUP
Mann Whitney test
P value	0.9655
Exact or approximate P value?	Exact
P value summary	ns
Significantly different (P < 0.05)?	No
One- or two-tailed P value?	Two-tailed
Sum of ranks in column C,D	81 , 109
Mann-Whitney U	43
Difference between medians
Median of column C	0.08500, n=8
Median of column D	0.000, n=11
Difference: Actual	-0.085
Difference: Hodges-Lehmann	0
95.91% CI of difference	-0.1200 to 0.2500
Exact or approximate CI?	Exact

## Sheet: Panel D
Panel D- regional ratio % tdT+Olig2+ of Olig2+
B2mtdT Brain
corpus
CUP	0	0.33	0.33
EAE	0.05	0.04	0.1	0.22	0.04	0	0.02	0	0.1
AT	0.3	0.03	0	0.21
AT-CUP	0.26	0.45	0.56	0.08	0	0.04
corpus horn
CUP	0.8	0.67	0.39
EAE	0.1	0.54	0.36	0.27	0.05	0.07	0.06	0.04	0
AT	0.03	0.26	0.8	0.21
AT-CUP	0.22	0.49	0.27	0.31	0.03	0.12
SVZ
CUP	0	0	0.11
EAE	0.2	0	0.06	0.22	0.17	0	0.04	0.7	0.6
AT	0.1	0.13	0.05	0.07
AT-CUP	0.01	0	0	0	0	0.03
ventral
CUP	0.2	0	0.17
EAE	0.65	0.42	0.48	0.29	0.74	0.93	0.88	0.26	0.3
AT	0.58	0.58	0.15	0.51
AT-CUP	0.5	0.06	0.16	0.62	0.97	0.81
corpus	Mean	SEM	N
CUP	0.22	0.11	3
EAE	0.0633333	0.023094	9
AT	0.135	0.0719375	4
AT-CUP	0.231667	0.0948127	6
corpus horn	Mean	SEM	N
CUP	0.62	0.120968	3
EAE	0.165556	0.0612398	9
AT	0.325	0.165856	4
AT-CUP	0.24	0.0651153	6
SVZ	Mean	SEM	N
CUP	0.0366667	0.0366667	3
EAE	0.221111	0.0859981	9
AT	0.0875	0.0175	4
AT-CUP	0.00666667	0.00494413	6
ventral	Mean	SEM	N
CUP	0.123333	0.0622718	3
EAE	0.55	0.0862329	9
AT	0.455	0.102997	4
AT-CUP	0.52	0.145854	6
corpus horn
Column C	ATCUP
vs.	vs.
Column B	CUP
Mann Whitney test
P value	0.0476
Exact or approximate P value?	Exact
P value summary	*
Significantly different (P < 0.05)?	Yes
One- or two-tailed P value?	Two-tailed
Sum of ranks in column B,C	23 , 22
Mann-Whitney U	1
Difference between medians
Median of column B	0.6700, n=3
Median of column C	0.2450, n=6
Difference: Actual	-0.425
Difference: Hodges-Lehmann	-0.38
95.24% CI of difference	-0.6800 to -0.08000
Exact or approximate CI?	Exact
corpus horn
Column B	CUP
vs.	vs.
Column A	EAE
Mann Whitney test
P value	0.0182
Exact or approximate P value?	Exact
P value summary	*
Significantly different (P < 0.05)?	Yes
One- or two-tailed P value?	Two-tailed
Sum of ranks in column A,B	46 , 32
Mann-Whitney U	1
Difference between medians
Median of column A	0.07000, n=9
Median of column B	0.6700, n=3
Difference: Actual	0.6
Difference: Hodges-Lehmann	0.44
96.36% CI of difference	0.1200 to 0.7500
Exact or approximate CI?	Exact
SVZ
Column C	AT-CUP
vs.	vs.
Column A	EAE
Mann Whitney test
P value	0.0192
Exact or approximate P value?	Exact
P value summary	*
Significantly different (P < 0.05)?	Yes
One- or two-tailed P value?	Two-tailed
Sum of ranks in column A,C	91 , 29
Mann-Whitney U	8
Difference between medians
Median of column A	0.1700, n=9
Median of column C	0.000, n=6
Difference: Actual	-0.17
Difference: Hodges-Lehmann	-0.17
95.04% CI of difference	-0.5900 to 0.000
Exact or approximate CI?	Exact
ventral
Column B	CUP
vs.	vs.
Column A	EAE
Mann Whitney test
P value	0.0091
Exact or approximate P value?	Exact
P value summary	**
Significantly different (P < 0.05)?	Yes
One- or two-tailed P value?	Two-tailed
Sum of ranks in column A,B	72 , 6
Mann-Whitney U	0
Difference between medians
Median of column A	0.4800, n=9
Median of column B	0.1700, n=3
Difference: Actual	-0.31
Difference: Hodges-Lehmann	-0.42
96.36% CI of difference	-0.7600 to -0.09000
Exact or approximate CI?	Exact
