# Supplementary material for: MHC class I and MHC class II reporter mice enable analysis of immune oligodendroglia in mouse models of multiple sclerosis
Source: eLife. 2023 Apr 14;12:e82938. doi: 10.7554/eLife.82938 (PMC10181822; doi:10.7554/eLife.82938)
Supplement: Figure 8—source data 2. [file elife-82938-fig8-data2.xlsx]

## Sheet: Panel E
Panel E- % tdT+Olig2+ of Olig2+
B2mtdT Brain					Cd74tdT Brain
All region mean					All region mean
	no EAE	EAE score 0	EAE score >0			EAE score 0	EAE score >0
	0.31	0.46	1.59			0	0.14
	0.3	0.83	7.35			0	0.12
	0.21	1.02	7.35			0	0.18
	0.69	1.85	13				0.75
		4.43	8.03				0.51
			6.34				0.15
			6.55				0.22
			3.57				0.66
			1.44				0
							1.72
							1.16
	Mean	SEM	N			Mean	SEM	N
baseline	0.3775	0.106566	4		EAE score 0	0	0	3
EAE score 0	1.718	0.715216	5		EAE score >0	0.51	0.160635	11
EAE score >0	6.13556	1.19702	9
Column C	EAE score >0				Column B	EAE score >0
vs.	vs.				vs.	vs.
Column A	baseline				Column A	EAE score 0
Mann Whitney test					Mann Whitney test
P value	0.0028				P value	0.0165
Exact or approximate P value?	Exact				Exact or approximate P value?	Exact
P value summary	**				P value summary	*
Significantly different (P < 0.05)?	Yes				Significantly different (P < 0.05)?	Yes
One- or two-tailed P value?	Two-tailed				One- or two-tailed P value?	Two-tailed
Sum of ranks in column A,C	10 , 81				Sum of ranks in column A,B	7.500 , 97.50
Mann-Whitney U	0				Mann-Whitney U	1.5
Difference between medians					Difference between medians
Median of column A	0.3050, n=4				Median of column A	0.000, n=3
Median of column C	6.550, n=9				Median of column B	0.2200, n=11
Difference: Actual	6.245				Difference: Actual	0.22
Difference: Hodges-Lehmann	6.245				Difference: Hodges-Lehmann	0.22
96.64% CI of difference	1.230 to 7.820				96.15% CI of difference	0.1200 to 1.160
Exact or approximate CI?	Exact				Exact or approximate CI?	Exact
Column C	EAE score >0
vs.	vs.
Column B	EAE score 0
Mann Whitney test
P value	0.018
Exact or approximate P value?	Exact
P value summary	*
Significantly different (P < 0.05)?	Yes
One- or two-tailed P value?	Two-tailed
Sum of ranks in column B,C	20 , 85
Mann-Whitney U	5
Difference between medians
Median of column B	1.020, n=5
Median of column C	6.550, n=9
Difference: Actual	5.53
Difference: Hodges-Lehmann	5.32
95.80% CI of difference	0.6100 to 7.010
Exact or approximate CI?	Exact

## Sheet: Panel F
Panel F- % tdT+Olig2+ of Olig2+ vs ROI tdT mean intensity
B2mtdT Brain			Cd74tdT Brain
All region mean			All region mean
%tdT+Olig2+ of Olig2+	tdT Mean Gray Value		%tdT+Olig2+ of Olig2+	tdT Mean Gray Value
1.59	46.5		0.12	18
7.35	56.3		0.18	12.6
7.35	88.9		0.75	11.8
13	85.2		0.51	17.7
8.03	76		0.15	16.5
6.34	32.5		0.22	13.8
6.55	57.9		0.66	10.4
3.57	43.6		0	10.7
1.44	50.8		1.72	24
0.83	35.3		0	12.1
1.02	39.5		0	11.7
4.43	63.3		0	12.7
Linear Regression			Linear Regression
Best-fit values			Best-fit values
Slope	0.143		Slope	0.08064
Y-intercept	-2.926		Y-intercept	-0.7967
X-intercept	20.47		X-intercept	9.879
1/slope	6.995		1/slope	12.4
Std. Error			Std. Error
Slope	0.04172		Slope	0.03056
Y-intercept	2.467		Y-intercept	0.4534
95% Confidence Intervals			95% Confidence Intervals
Slope	0.05001 to 0.2359		Slope	0.01255 to 0.1487
Y-intercept	-8.423 to 2.571		Y-intercept	-1.807 to 0.2135
X-intercept	-49.02 to 37.45		X-intercept	-15.61 to 13.24
Goodness of Fit			Goodness of Fit
R squared	0.5401		R squared	0.4105
Sy.x	2.61		Sy.x	0.4053
Is slope significantly non-zero?			Is slope significantly non-zero?
F	11.74		F	6.963
DFn, DFd	1, 10		DFn, DFd	1, 10
P value	0.0065		P value	0.0248
Deviation from zero?	Significant		Deviation from zero?	Significant
Equation	Y = 0.1430*X - 2.926		Equation	Y = 0.08064*X - 0.7967
Data			Data
Number of X values	12		Number of X values	12
Maximum number of Y replicates	1		Maximum number of Y replicates	1
Total number of values	12		Total number of values	12
Number of missing values	0		Number of missing values	0

## Sheet: Panel H
Panel H- % tDT+Olig2+ of Olig2+
	B2mtdT Brain						Cd74tdT Brain
	All region mean						All region mean
	Baseline	CUP	EAE score >0	AT	AT-CUP		Baseline	CUP	EAE score >0	AT	AT-CUP
	0.31	0.32	1.59	2.37	22.55		0	0	0.14	0.24	0.99
	0.3	0.14	7.35	1.36	31.26		0	0	0.12	0.08	3.8
	0.21	1.17	7.35	0.81	19.51		0	0	0.18	0	0.47
	0.69		13	3.63	4.94				0.75	0.03	0.17
			8.03		2.71				0.51	0.1	0.22
			6.34		23.64				0.15	0.05	0.73
			6.55						0.22		0.4
			3.57						0.66		0.5
			1.44						0
									1.72
									1.16
	Mean	SEM	N				Mean	SEM	N
baseline	0.3775	0.106566	4			EAE score 0	0	0	3
CUP	0.543333	0.317613	3			CUP	0	0	3
EAE score >0	6.13556	1.19702	9			EAE score >0	0.51	0.160635	11
AT	2.0425	0.619965	4			AT	0.0833333	0.0345125	6
AT-CUP	17.435	4.59366	6			AT-CUP	0.91	0.423346	8
Column E	ATCUP					Column E	ATCUP
vs.	vs.					vs.	vs.
Column D	AT					Column B	CUP
Mann Whitney test						Mann Whitney test
P value	0.019					P value	0.0121
Exact or approximate P value?	Exact					Exact or approximate P value?	Exact
P value summary	*					P value summary	*
Significantly different (P < 0.05)?	Yes					Significantly different (P < 0.05)?	Yes
One- or two-tailed P value?	Two-tailed					One- or two-tailed P value?	Two-tailed
Sum of ranks in column D,E	11 , 44					Sum of ranks in column B,E	6 , 60
Mann-Whitney U	1					Mann-Whitney U	0
Difference between medians						Difference between medians
Median of column D	1.865, n=4					Median of column B	0.000, n=3
Median of column E	21.03, n=6					Median of column E	0.4850, n=8
Difference: Actual	19.17					Difference: Actual	0.485
Difference: Hodges-Lehmann	18.81					Difference: Hodges-Lehmann	0.485
96.19% CI of difference	1.310 to 28.89					95.15% CI of difference	0.1700 to 3.800
Exact or approximate CI?	Exact					Exact or approximate CI?	Exact
Column E	ATCUP					Column E	ATCUP
vs.	vs.					vs.	vs.
Column C	EAE					Column D	AT
Mann Whitney test						Mann Whitney test
P value	0.1061					P value	0.0027
Exact or approximate P value?	Exact					Exact or approximate P value?	Exact
P value summary	ns					P value summary	**
Significantly different (P < 0.05)?	No					Significantly different (P < 0.05)?	Yes
One- or two-tailed P value?	Two-tailed					One- or two-tailed P value?	Two-tailed
Sum of ranks in column C,E	58 , 62					Sum of ranks in column D,E	23 , 82
Mann-Whitney U	13					Mann-Whitney U	2
Difference between medians						Difference between medians
Median of column C	6.550, n=9					Median of column D	0.06500, n=6
Median of column E	21.03, n=6					Median of column E	0.4850, n=8
Difference: Actual	14.48					Difference: Actual	0.42
Difference: Hodges-Lehmann	14.86					Difference: Hodges-Lehmann	0.42
95.04% CI of difference	-1.610 to 21.11					95.74% CI of difference	0.1600 to 0.9400
Exact or approximate CI?	Exact					Exact or approximate CI?	Exact
Column D	AT					Column E	ATCUP
vs.	vs.					vs.	vs.
Column C	EAE					Column C	EAE
Mann Whitney test						Mann Whitney test
P value	0.0476					P value	0.4547
Exact or approximate P value?	Exact					Exact or approximate P value?	Exact
P value summary	*					P value summary	ns
Significantly different (P < 0.05)?	Yes					Significantly different (P < 0.05)?	No
One- or two-tailed P value?	Two-tailed					One- or two-tailed P value?	Two-tailed
Sum of ranks in column C,D	76 , 15					Sum of ranks in column C,E	100.5 , 89.50
Mann-Whitney U	5					Mann-Whitney U	34.5
Difference between medians						Difference between medians
Median of column C	6.550, n=9					Median of column C	0.2200, n=11
Median of column D	1.865, n=4					Median of column E	0.4850, n=8
Difference: Actual	-4.685					Difference: Actual	0.265
Difference: Hodges-Lehmann	-4.29					Difference: Hodges-Lehmann	0.2
96.64% CI of difference	-7.220 to 0.06000					95.91% CI of difference	-0.5300 to 0.5900
Exact or approximate CI?	Exact					Exact or approximate CI?	Exact
Column E	ATCUP
vs.	vs.
Column B	CUP
Mann Whitney test
P value	0.0238
Exact or approximate P value?	Exact
P value summary	*
Significantly different (P < 0.05)?	Yes
One- or two-tailed P value?	Two-tailed
Sum of ranks in column B,E	6 , 39
Mann-Whitney U	0
Difference between medians
Median of column B	0.3200, n=3
Median of column E	21.03, n=6
Difference: Actual	20.71
Difference: Hodges-Lehmann	20.38
95.24% CI of difference	2.390 to 30.94
Exact or approximate CI?	Exact

## Sheet: Panel I
Panel I- regional ratio % tDT+Olig2+ of Olig2+
B2mtdT Brain
corpus
CUP	0	0.33	0.33
EAE	0.05	0.04	0.1	0.22	0.04	0	0.02	0	0.1
AT	0.3	0.03	0	0.21
AT-CUP	0.26	0.45	0.56	0.08	0	0.04
corpus horn
CUP	0.8	0.67	0.39
EAE	0.1	0.54	0.36	0.27	0.05	0.07	0.06	0.04	0
AT	0.03	0.26	0.8	0.21
AT-CUP	0.22	0.49	0.27	0.31	0.03	0.12
SVZ
CUP	0	0	0.11
EAE	0.2	0	0.06	0.22	0.17	0	0.04	0.7	0.6
AT	0.1	0.13	0.05	0.07
AT-CUP	0.01	0	0	0	0	0.03
ventral
CUP	0.2	0	0.17
EAE	0.65	0.42	0.48	0.29	0.74	0.93	0.88	0.26	0.3
AT	0.58	0.58	0.15	0.51
AT-CUP	0.5	0.06	0.16	0.62	0.97	0.81
corpus	Mean	SEM	N
CUP	0.22	0.11	3
EAE	0.0633333	0.023094	9
AT	0.135	0.0719375	4
AT-CUP	0.231667	0.0948127	6
corpus horn	Mean	SEM	N
CUP	0.62	0.120968	3
EAE	0.165556	0.0612398	9
AT	0.325	0.165856	4
AT-CUP	0.24	0.0651153	6
SVZ	Mean	SEM	N
CUP	0.0366667	0.0366667	3
EAE	0.221111	0.0859981	9
AT	0.0875	0.0175	4
AT-CUP	0.00666667	0.00494413	6
ventral	Mean	SEM	N
CUP	0.123333	0.0622718	3
EAE	0.55	0.0862329	9
AT	0.455	0.102997	4
AT-CUP	0.52	0.145854	6

## Sheet: B2m brain EAE
B2m baseline brain											B2m EAE score 0 brain												B2m EAE score >0 brain
B2m baseline #4											B2m EAE score 0 #4												B2m EAE score >0 #1 (score 1.5)
Section	Region	Total Olig2+	Total tdT+Olig2+	%tdT+Olig2+		corpus	CH	SVZ	ventral		Section	Region	Mean tdT	Total Olig2+	Total tdT+Olig2+	%tdT+Olig2+		corpus	CH	SVZ	ventral		Section	Region	Mean TdT	Total Olig2+	Total TdT+Olig2+	%Tdt+Olig2+		corpus	CH	SVZ	ventral
1	Corpus	117	0	0	DP	0	6	0	3		1	Corpus		26	0	0	DP	0	1	4	2		1	Corpus	69.771	20	0	0	DP	1	2	4	13
2	Corpus	74	0	0	Olig2	430	855	348	1227		2	Corpus		40	0	0	Olig2	110	301	239	865		2	Corpus		53	0	0	Olig2	135	267	188	665
3	Corpus	155	0	0	Av	0	0.701754	0	0.244499		3	Corpus		19	0	0	Av	0	0.332226	1.67364	0.231214		3	Corpus		28	1	3.57143	Av	0.740741	0.749064	2.12766	1.95489
4	Corpus	84	0	0	N	4	8	8	8		4	Corpus		25	0	0	N	4	7	8	6		4	Corpus		34	0	0	N	4	8	8	8
1	Corpus Horn L	118	0	0	Ratio	0	0.666667	0	0.333333		1	Corpus Horn L		43	0	0	Ratio	0	0.142857	0.571429	0.285714		1	Corpus Horn L	61.905	35	1	2.85714	Ratio	0.05	0.1	0.2	0.65
2	Corpus Horn L	79	0	0							2	Corpus Horn L		46	0	0							2	Corpus Horn L	51.19	37	0	0
3	Corpus Horn L	133	0	0							3	Corpus Horn L		23	0	0							3	Corpus Horn L	43.78	27	0	0
4	Corpus Horn L	123	3	2.43902							4	Corpus Horn L		42	1	2.38095							4	Corpus Horn L	47.448	30	0	0
1	Corpus Horn R	54	0	0							1	Corpus Horn R											1	Corpus Horn R	51.96	43	0	0
2	Corpus Horn R	91	3	3.2967							2	Corpus Horn R		56	0	0							2	Corpus Horn R	48.223	35	0	0
3	Corpus Horn R	145	0	0							3	Corpus Horn R		32	0	0							3	Corpus Horn R	46.812	32	0	0
4	Corpus Horn R	112	0	0							4	Corpus Horn R		59	0	0							4	Corpus Horn R	48.293	28	1	3.57143
1	SVZ L	38	0	0							1	SVZ L		42	3	7.14286							1	SVZ L	31.947	22	0	0
2	SVZ L	54	0	0							2	SVZ L		51	1	1.96078							2	SVZ L		26	0	0
3	SVZ L	72	0	0							3	SVZ L		6	0	0							3	SVZ L		21	0	0
4	SVZ L	35	0	0							4	SVZ L		32	0	0							4	SVZ L		15	0	0
1	SVZ R	47	0	0							1	SVZ R		20	0	0							1	SVZ R		26	1	3.84615
2	SVZ R	23	0	0							2	SVZ R		25	0	0							2	SVZ R		10	0	0
3	SVZ R	43	0	0							3	SVZ R		21	0	0							3	SVZ R		42	2	4.7619
4	SVZ R	36	0	0							4	SVZ R		42	0	0							4	SVZ R		26	1	3.84615
1	Ventral L	88	0	0							1	Ventral L		137	0	0							1	Ventral L	50.78	106	1	0.943396
2	Ventral L	165	2	1.21212							2	Ventral L		147	0	0							2	Ventral L	39.771	55	0	0
3	Ventral L	148	0	0							3	Ventral L											3	Ventral L	32.682	47	0	0
4	Ventral L	309	0	0							4	Ventral L		158	2	1.26582							4	Ventral L	34.84	51	3	5.88235
1	Ventral R	76	0	0							1	Ventral R		138	0	0							1	Ventral R	56.354	41	3	7.31707
2	Ventral R	145	0	0							2	Ventral R		150	0	0							2	Ventral R	48.261	156	4	2.5641
3	Ventral R	128	1	0.78125							3	Ventral R											3	Ventral R	36.411	104	0	0
4	Ventral R	168	0	0							4	Ventral R		135	0	0							4	Ventral R	36.381	105	2	1.90476
	Total	2860	9	0.314685										1515	7	0.462046									46.4894	1255	20	1.59363
			N	28											N	25											N	28
B2m baseline #1											B2m EAE score 0 #1												B2m EAE score >0 #3 (score 2)
Section	Region	Total Olig2+	Total tdT+Olig2+	%tdT+Olig2+		corpus	CH	SVZ	ventral		Section	Region	Mean tdT	Total Olig2+	Total tdT+Olig2+	%tdT+Olig2+		corpus	CH	SVZ	ventral		Section	Region	Mean TdT	Total Olig2+	Total TdT+Olig2+	%Tdt+Olig2+		corpus	CH	SVZ	ventral
1	Corpus	82	0	0	DP	0	0	5	2		1	Corpus	69.695	98	0	0	DP	0	5	2	7		1	Corpus	79.421	4	0	0	DP	3	44	0	34
2	Corpus	95	0	0	Olig2	355	540	208	1203		2	Corpus	88.652	88	0	0	Olig2	355	475	273	578		2	Corpus		51	2	3.92157	Olig2	89	266	87	660
3	Corpus	116	0	0	Av	0	0	2.40385	0.166251		3	Corpus	75.054	73	0	0	Av	0	1.05263	0.732601	1.21107		3	Corpus		34	1	2.94118	Av	3.37079	16.5414	0	5.15152
4	Corpus	62	0	0	N	4	8	6	8		4	Corpus	62.636	96	0	0	N	4	7	8	8		4	Corpus					N	3	8	4	8
1	Corpus Horn L	86	0	0	Ratio	0	0	0.714286	0.285714		1	Corpus Horn L	48.352	91	0	0	Ratio	0	0.357143	0.142857	0.5		1	Corpus Horn L	102.86	52	9	17.3077	Ratio	0.037037	0.54321	0	0.419753
2	Corpus Horn L	68	0	0							2	Corpus Horn L	36.564	38	0	0							2	Corpus Horn L	77.568	39	7	17.9487
3	Corpus Horn L	75	0	0							3	Corpus Horn L	43.83	60	0	0							3	Corpus Horn L	72.749	18	3	16.6667
4	Corpus Horn L	67	0	0							4	Corpus Horn L	30.665	78	4	5.12821							4	Corpus Horn L	89.462	31	4	12.9032
1	Corpus Horn R	63	0	0							1	Corpus Horn R	43.825	84	1	1.19048							1	Corpus Horn R	86.379	40	9	22.5
2	Corpus Horn R	54	0	0							2	Corpus Horn R											2	Corpus Horn R	59.204	31	5	16.129
3	Corpus Horn R	81	0	0							3	Corpus Horn R	31.801	63	0	0							3	Corpus Horn R	55.434	27	2	7.40741
4	Corpus Horn R	46	0	0							4	Corpus Horn R	28.98	61	0	0							4	Corpus Horn R	46.169	28	5	17.8571
1	SVZ L	37	0	0							1	SVZ L	28.819	34	1	2.94118							1	SVZ L		26	0	0
2	SVZ L	40	5	12.5							2	SVZ L	23.083	36	0	0							2	SVZ L		23	0	0
3	SVZ L										3	SVZ L	22.481	22	0	0							3	SVZ L
4	SVZ L	35	0	0							4	SVZ L	19.802	37	0	0							4	SVZ L
1	SVZ R	24	0	0							1	SVZ R	22.826	42	0	0							1	SVZ R		17	0	0
2	SVZ R	29	0	0							2	SVZ R	21.521	30	1	3.33333							2	SVZ R		21	0	0
3	SVZ R										3	SVZ R	27.122	36	0	0							3	SVZ R
4	SVZ R	43	0	0							4	SVZ R	17.067	36	0	0							4	SVZ R
1	Ventral L	168	0	0							1	Ventral L	31.341	45	0	0							1	Ventral L	32.211	56	3	5.35714
2	Ventral L	117	0	0							2	Ventral L	27.231	72	3	4.16667							2	Ventral L	36.166	89	2	2.24719
3	Ventral L	107	0	0							3	Ventral L	21.137	110	1	0.909091							3	Ventral L	32.114	92	0	0
4	Ventral L	253	0	0							4	Ventral L	21.763	82	0	0							4	Ventral L	28.036	98	2	2.04082
1	Ventral R	100	0	0							1	Ventral R	32.198	42	0	0							1	Ventral R	47.585	61	4	6.55738
2	Ventral R	146	0	0							2	Ventral R	28.851	57	1	1.75439							2	Ventral R	50.832	93	12	12.9032
3	Ventral R	120	0	0							3	Ventral R	20.815	74	2	2.7027							3	Ventral R	32.714	104	6	5.76923
4	Ventral R	192	2	1.04167							4	Ventral R	27.077	96	0	0							4	Ventral R	28.323	67	5	7.46269
		2306	7	0.303556									35.3033	1681	14	0.832838									56.3075	1102	81	7.35027
			N	26											N	27											N	23
B2m baseline #2											B2m EAE score 0 #2												B2m EAE score >0 #4 (score 2)
Section	Region	Total Olig2+	Total tdT+Olig2+	%tdT+Olig2+		corpus	CH	SVZ	ventral		Section	Region	Mean tdT	Total Olig2+	Total tdT+Olig2+	%tdT+Olig2+		corpus	CH	SVZ	ventral		Section	Region	Mean TdT	Total Olig2+	Total TdT+Olig2+	%Tdt+Olig2+		corpus	CH	SVZ	ventral
1	Corpus	110	0	0	DP	0	2	2	2		1	Corpus	67.328	146	2	1.36986	DP	3	8	5	7		1	Corpus	121.702	25	1	4	DP	10	36	6	48
2	Corpus	84	0	0	Olig2	393	639	381	1417		2	Corpus	61.947	80	0	0	Olig2	386	736	356	782		2	Corpus	144.412	23	1	4.34783	Olig2	130	335	105	790
3	Corpus	100	0	0	Av	0	0.312989	0.524934	0.141143		3	Corpus	106.019	63	1	1.5873	Av	0.777202	1.08696	1.40449	0.895141		3	Corpus	135.58	69	8	11.5942	Av	7.69231	10.7463	5.71429	6.07595
4	Corpus	99	0	0	N	4	7	8	8		4	Corpus	56.793	97	0	0	N	4	8	8	8		4	Corpus	137.845	13	0	0	N	4	8	4	8
1	Corpus Horn L	116	0	0	Ratio	0	0.333333	0.333333	0.333333		1	Corpus Horn L	42.758	84	1	1.19048	Ratio	0.130435	0.347826	0.217391	0.304348		1	Corpus Horn L	160.936	34	3	8.82353	Ratio	0.1	0.36	0.06	0.48
2	Corpus Horn L	77	2	2.5974							2	Corpus Horn L	41.816	95	1	1.05263							2	Corpus Horn L	102.3	40	8	20
3	Corpus Horn L										3	Corpus Horn L	40.152	77	0	0							3	Corpus Horn L	86.557	37	4	10.8108
4	Corpus Horn L	92	0	0							4	Corpus Horn L	41.762	110	0	0							4	Corpus Horn L	170.564	84	14	16.6667
1	Corpus Horn R	111	0	0							1	Corpus Horn R	50.836	84	0	0							1	Corpus Horn R	84.252	12	0	0
2	Corpus Horn R	80	0	0							2	Corpus Horn R	39.912	84	4	4.7619							2	Corpus Horn R	60.976	42	1	2.38095
3	Corpus Horn R	81	0	0							3	Corpus Horn R	42.229	70	2	2.85714							3	Corpus Horn R	82.751	16	1	6.25
4	Corpus Horn R	82	0	0							4	Corpus Horn R	36.729	132	0	0							4	Corpus Horn R	68.659	70	5	7.14286
1	SVZ L	62	2	3.22581							1	SVZ L	32.092	89	1	1.1236							1	SVZ L	80.147	13	3	23.0769
2	SVZ L	64	0	0							2	SVZ L	31.274	39	1	2.5641							2	SVZ L	79.51	29	1	3.44828
3	SVZ L	38	0	0							3	SVZ L	34.588	24	2	8.33333							3	SVZ L
4	SVZ L	51	0	0							4	SVZ L	26.318	29	0	0							4	SVZ L
1	SVZ R	50	0	0							1	SVZ R	34.048	66	0	0							1	SVZ R
2	SVZ R	31	0	0							2	SVZ R	22.979	62	1	1.6129							2	SVZ R	79.802	32	1	3.125
3	SVZ R	38	0	0							3	SVZ R	36.874	18	0	0							3	SVZ R	93.705	31	1	3.22581
4	SVZ R	47	0	0							4	SVZ R	22.619	29	0	0							4	SVZ R
1	Ventral L	63	0	0							1	Ventral L	32.408	51	0	0							1	Ventral L	71.497	76	4	5.26316
2	Ventral L	230	0	0							2	Ventral L	28.6	94	0	0							2	Ventral L	72.699	80	7	8.75
3	Ventral L	280	0	0							3	Ventral L	30.221	140	4	2.85714							3	Ventral L	41.891	134	11	8.20896
4	Ventral L	119	0	0							4	Ventral L	28.196	91	0	0							4	Ventral L	37.264	138	7	5.07246
1	Ventral R	101	0	0							1	Ventral R	30.117	64	1	1.5625							1	Ventral R	72.316	48	0	0
2	Ventral R	231	1	0.4329							2	Ventral R	30.465	103	2	1.94175							2	Ventral R	74.788	134	8	5.97015
3	Ventral R	143	1	0.699301							3	Ventral R	26.936	110	0	0							3	Ventral R	35.178	57	4	7.01754
4	Ventral R	250	0	0							4	Ventral R	29.324	129	0	0							4	Ventral R	39.099	123	7	5.69106
		2830	6	0.212014									39.4764	2260	23	1.0177									88.9346	1360	100	7.35294
			N	27											N	28											N	24
B2m baseline #3											B2m EAE score 0 #5												B2m EAE score >0 #5 (score 2.5)
Section	Region	Total Olig2+	Total tdT+Olig2+	%tdT+Olig2+		corpus	CH	SVZ	ventral		Section	Region	Mean tdT	Total Olig2+	Total tdT+Olig2+	%tdT+Olig2+		corpus	CH	SVZ	ventral		Section	Region	Mean TdT	Total Olig2+	Total TdT+Olig2+	%Tdt+Olig2+		corpus	CH	SVZ	ventral
1	Corpus				DP	2	0	8	0		1	Corpus		16	0	0	DP	5	0	9	1		1	Corpus	152.964	24	0	0	DP	30	37	30	40
2	Corpus	59	0	0	Olig2	151	284	214	790		2	Corpus		33	3	9.09091	Olig2	76	158	210	366		2	Corpus	176.524	36	8	22.2222	Olig2	195	245	180	434
3	Corpus	92	2	2.17391	Av	1.3245	0	3.73832	0		3	Corpus		27	2	7.40741	Av	6.57895	0	4.28571	0.273224		3	Corpus	162.001	46	9	19.5652	Av	15.3846	15.102	16.6667	9.21659
4	Corpus				N	2	8	8	8		4	Corpus					N	3	7	8	8		4	Corpus	164.346	89	13	14.6067	N	4	8	8	8
1	Corpus Horn L	44	0	0	Ratio	0.2	0	0.8	0		1	Corpus Horn L		30	0	0	Ratio	0.333333	0	0.6	0.0666667		1	Corpus Horn L	64.792	34	0	0	Ratio	0.218978	0.270073	0.218978	0.291971
2	Corpus Horn L	48	0	0							2	Corpus Horn L		20	0	0							2	Corpus Horn L	102.75	23	3	13.0435
3	Corpus Horn L	28	0	0							3	Corpus Horn L		18	0	0							3	Corpus Horn L	106.141	28	5	17.8571
4	Corpus Horn L	35	0	0							4	Corpus Horn L		17	0	0							4	Corpus Horn L	87.025	24	2	8.33333
1	Corpus Horn R	30	0	0							1	Corpus Horn R		33	0	0							1	Corpus Horn R	70.505	38	4	10.5263
2	Corpus Horn R	34	0	0							2	Corpus Horn R		21	0	0							2	Corpus Horn R	94.134	51	12	23.5294
3	Corpus Horn R	49	0	0							3	Corpus Horn R		19	0	0							3	Corpus Horn R	101.513	30	7	23.3333
4	Corpus Horn R	16	0	0							4	Corpus Horn R											4	Corpus Horn R	92.425	17	4	23.5294
1	SVZ L	23	0	0							1	SVZ L		16	0	0							1	SVZ L	44.804	13	3	23.0769
2	SVZ L	46	5	10.8696							2	SVZ L		32	3	9.375							2	SVZ L	100.347	15	8	53.3333
3	SVZ L	15	0	0							3	SVZ L		32	3	9.375							3	SVZ L	104.609	28	9	32.1429
4	SVZ L	22	0	0							4	SVZ L		25	0	0							4	SVZ L	94.628	25	6	24
1	SVZ R	29	0	0							1	SVZ R		31	0	0							1	SVZ R	42.438	17	1	5.88235
2	SVZ R	28	3	10.7143							2	SVZ R		20	0	0							2	SVZ R	63.784	16	2	12.5
3	SVZ R	26	0	0							3	SVZ R		20	0	0							3	SVZ R	39.791	47	1	2.12766
4	SVZ R	25	0	0							4	SVZ R		34	3	8.82353							4	SVZ R	63.227	19	0	0
1	Ventral L	90	0	0							1	Ventral L		51	0	0							1	Ventral L	71.997	48	4	8.33333
2	Ventral L	102	0	0							2	Ventral L		41	0	0							2	Ventral L	81.547	51	4	7.84314
3	Ventral L	165	0	0							3	Ventral L		33	0	0							3	Ventral L	47.021	76	4	5.26316
4	Ventral L	75	0	0							4	Ventral L		36	0	0							4	Ventral L	35.767	57	7	12.2807
1	Ventral R	87	0	0							1	Ventral R		62	0	0							1	Ventral R	84.358	53	12	22.6415
2	Ventral R	101	0	0							2	Ventral R		51	0	0							2	Ventral R	61.952	26	1	3.84615
3	Ventral R	102	0	0							3	Ventral R		55	0	0							3	Ventral R	33.092	56	3	5.35714
4	Ventral R	68	0	0							4	Ventral R		37	1	2.7027							4	Ventral R	41.528	67	5	7.46269
		1439	10	0.694927										810	15	1.85185									85.2146	1054	137	12.9981
			N	26											N	26											N	28
											B2m EAE score 0 #3												B2m EAE score >0 #6 (score 3)
											Section	Region	Mean tdT	Total Olig2+	Total tdT+Olig2+	%tdT+Olig2+		corpus	CH	SVZ	ventral		Section	Region	Mean TdT	Total Olig2+	Total TdT+Olig2+	%Tdt+Olig2+		corpus	CH	SVZ	ventral
											1	Corpus	94.228	57	0	0	DP	3	1	10	66		1	Corpus	75.694	52	1	1.92308	DP	5	6	21	93
											2	Corpus	91.08	102	3	2.94118	Olig2	350	253	216	985		2	Corpus	144.89	107	1	0.934579	Olig2	316	536	189	515
											3	Corpus	93.356	191	0	0	Av	0.857143	0.395257	4.62963	6.70051		3	Corpus	146.585	106	3	2.83019	Av	1.58228	1.1194	11.1111	18.0583
											4	Corpus					N	3	7	4	8		4	Corpus	123.854	51	0	0	N	4	7	8	8
											1	Corpus Horn L					Ratio	0.0375	0.0125	0.125	0.825		1	Corpus Horn L	46.179	112	0	0	Ratio	0.04	0.048	0.168	0.744
											2	Corpus Horn L	69.166	54	0	0							2	Corpus Horn L	73.625	38	2	5.26316
											3	Corpus Horn L	83.896	31	0	0							3	Corpus Horn L	84.591	46	0	0
											4	Corpus Horn L	53.147	23	0	0							4	Corpus Horn L	81.791	60	1	1.66667
											1	Corpus Horn R	51.066	61	0	0							1	Corpus Horn R	55.474	111	0	0
											2	Corpus Horn R	58.642	21	0	0							2	Corpus Horn R	76.197	50	1	2
											3	Corpus Horn R	70.363	32	0	0							3	Corpus Horn R
											4	Corpus Horn R	69.538	31	1	3.22581							4	Corpus Horn R	63.381	119	2	1.68067
											1	SVZ L	57.987	72	0	0							1	SVZ L	42.887	17	0	0
											2	SVZ L											2	SVZ L	67.821	21	0	0
											3	SVZ L											3	SVZ L	60.905	27	1	3.7037
											4	SVZ L	63.02	91	10	10.989							4	SVZ L	64.509	18	2	11.1111
											1	SVZ R	45.061	23	0	0							1	SVZ R	52.422	20	0	0
											2	SVZ R											2	SVZ R	98.308	25	7	28
											3	SVZ R											3	SVZ R	70.883	26	0	0
											4	SVZ R	87.732	30	0	0							4	SVZ R	77.652	35	11	31.4286
											1	Ventral L	65.92	75	1	1.33333							1	Ventral L		33	3	9.09091
											2	Ventral L	60.88	136	22	16.1765							2	Ventral L	110.272	80	20	25
											3	Ventral L	33.502	240	18	7.5							3	Ventral L	41.589	75	18	24
											4	Ventral L	36.893	104	9	8.65385							4	Ventral L	54.489	104	15	14.4231
											1	Ventral R	73.2	86	1	1.16279							1	Ventral R	89.64	29	0	0
											2	Ventral R	58.937	87	7	8.04598							2	Ventral R	84.549	75	21	28
											3	Ventral R	32.326	165	5	3.0303							3	Ventral R	38.627	68	5	7.35294
											4	Ventral R	42.399	92	3	3.26087							4	Ventral R	48.085	51	11	21.5686
													63.2881	1804	80	4.43459									75.9577	1556	125	8.03342
															N	22											N	27
																							B2m EAE score >0 #8 (score 3)
																							Section	Region	Mean TdT	Total Olig2+	Total TdT+Olig2+	%Tdt+Olig2+		corpus	CH	SVZ	ventral
																							1	Corpus	55.119	22	0	0	DP	0	3	0	39
																							2	Corpus	65.252	15	0	0	Olig2	52	209	50	351
																							3	Corpus					Av	0	1.43541	0	11.1111
																							4	Corpus	46.141	15	0	0	N	3	6	3	8
																							1	Corpus Horn L					Ratio	0	0.0714286	0	0.928571
																							2	Corpus Horn L	30.666	43	0	0
																							3	Corpus Horn L	33.218	20	0	0
																							4	Corpus Horn L	30.667	45	0	0
																							1	Corpus Horn R
																							2	Corpus Horn R	29.378	27	2	7.40741
																							3	Corpus Horn R	36.273	37	1	2.7027
																							4	Corpus Horn R	28.032	37	0	0
																							1	SVZ L
																							2	SVZ L	17.582	15	0	0
																							3	SVZ L	17.582	15	0	0
																							4	SVZ L
																							1	SVZ R
																							2	SVZ R	14.568	20	0	0
																							3	SVZ R
																							4	SVZ R
																							1	Ventral L	50.38	26	6	23.0769
																							2	Ventral L	24.039	51	5	9.80392
																							3	Ventral L	33.363	44	3	6.81818
																							4	Ventral L	18.982	59	13	22.0339
																							1	Ventral R	36.42	29	1	3.44828
																							2	Ventral R	31.899	49	4	8.16327
																							3	Ventral R	27.189	44	1	2.27273
																							4	Ventral R	23.281	49	6	12.2449
																									32.5015	662	42	6.34441
																											N	20
																							B2m EAE score >0 #2 (score 3.5)
																							Section	Region	Mean TdT	Total Olig2+	Total TdT+Olig2+	%Tdt+Olig2+		corpus	CH	SVZ	ventral
																							1	Corpus		75	1	1.33333	DP	2	8	5	114
																							2	Corpus	103.162	89	1	1.1236	Olig2	257	395	230	1086
																							3	Corpus	87.983	93	0	0	Av	0.77821	2.02532	2.17391	10.4972
																							4	Corpus					N	3	7	5	8
																							1	Corpus Horn L	43.142	82	0	0	Ratio	0.0155039	0.0620155	0.0387597	0.883721
																							2	Corpus Horn L	89.154	37	1	2.7027
																							3	Corpus Horn L	84.451	55	0	0
																							4	Corpus Horn L	87.65	47	6	12.766
																							1	Corpus Horn R
																							2	Corpus Horn R	73.101	36	0	0
																							3	Corpus Horn R	75.985	43	0	0
																							4	Corpus Horn R	72.233	95	1	1.05263
																							1	SVZ L
																							2	SVZ L	46.683	21	2	9.52381
																							3	SVZ L	29.22	36	1	2.77778
																							4	SVZ L	44.879	33	2	6.06061
																							1	SVZ R
																							2	SVZ R
																							3	SVZ R	37.118	89	0	0
																							4	SVZ R	35.359	51	0	0
																							1	Ventral L	54.496	122	6	4.91803
																							2	Ventral L	60.689	121	30	24.7934
																							3	Ventral L	28.381	222	25	11.2613
																							4	Ventral L	37.322	182	21	11.5385
																							1	Ventral R	65.005	81	16	19.7531
																							2	Ventral R	50.654	86	5	5.81395
																							3	Ventral R	31.04	156	5	3.20513
																							4	Ventral R	36.138	116	6	5.17241
																									57.902	1968	129	6.55488
																											N	23
																							B2m EAE score >0 #7 (score 3)
																							Section	Region	Mean TdT	Total Olig2+	Total TdT+Olig2+	%Tdt+Olig2+		corpus	CH	SVZ	ventral
																							1	Corpus	62.918	27	0	0	DP	0	1	19	7
																							2	Corpus					Olig2	89	271	204	193
																							3	Corpus	71.335	36	0	0	Av	0	0.369004	9.31373	3.62694
																							4	Corpus	77.734	26	0	0	N	3	7	6	5
																							1	Corpus Horn L	38.014	19	0	0	Ratio	0	0.037037	0.703704	0.259259
																							2	Corpus Horn L
																							3	Corpus Horn L	45.915	50	0	0
																							4	Corpus Horn L	34.631	33	0	0
																							1	Corpus Horn R	32.779	46	0	0
																							2	Corpus Horn R	40.88	23	0	0
																							3	Corpus Horn R	53.318	57	0	0
																							4	Corpus Horn R	37.631	43	1	2.32558
																							1	SVZ L
																							2	SVZ L	26.279	21	1	4.7619
																							3	SVZ L		53	6	11.3208
																							4	SVZ L		37	4	10.8108
																							1	SVZ R
																							2	SVZ R	32.122	16	1	6.25
																							3	SVZ R		36	1	2.77778
																							4	SVZ R		41	6	14.6341
																							1	Ventral L	35.083	31	1	3.22581
																							2	Ventral L	44.701	21	0	0
																							3	Ventral L
																							4	Ventral L	33.121	51	3	5.88235
																							1	Ventral R	37.084	38	3	7.89474
																							2	Ventral R
																							3	Ventral R
																							4	Ventral R	37.735	52	0	0
																									43.6047	757	27	3.56671
																											N	21
																							B2m EAE score >0 #9 (score 3.5)
																							Section	Region	Mean TdT	Total Olig2+	Total TdT+Olig2+	%Tdt+Olig2+		corpus	CH	SVZ	ventral
																							1	Corpus	106.355	36	0	0	DP	1	0	6	3
																							2	Corpus					Olig2	72	183	192	247
																							3	Corpus	91.735	17	0	0	Av	1.38889	0	3.125	1.21457
																							4	Corpus	95.323	19	1	5.26316	N	3	5	6	8
																							1	Corpus Horn L	74.208	22	0	0	Ratio	0.1	0	0.6	0.3
																							2	Corpus Horn L	55.801	26	0	0
																							3	Corpus Horn L	37.43	39	0	0
																							4	Corpus Horn L	53.735	40	0	0
																							1	Corpus Horn R
																							2	Corpus Horn R
																							3	Corpus Horn R	41.239	56	0	0
																							4	Corpus Horn R
																							1	SVZ L		32	2	6.25
																							2	SVZ L		45	2	4.44444
																							3	SVZ L	21.509	8	0	0
																							4	SVZ L
																							1	SVZ R		41	0	0
																							2	SVZ R		56	2	3.57143
																							3	SVZ R	25.84	10	0	0
																							4	SVZ R
																							1	Ventral L	52.48	21	1	4.7619
																							2	Ventral L	40.945	59	1	1.69492
																							3	Ventral L	25.013	34	1	2.94118
																							4	Ventral L	34.18	25	0	0
																							1	Ventral R	58.303	12	0	0
																							2	Ventral R	39.955	58	0	0
																							3	Ventral R	31.865	20	0	0
																							4	Ventral R	28.505	18	0	0
																									50.8012	694	10	1.44092
																											N	22

## Sheet: CD74 brain EAE
Cd74 EAE score 0 brain												Cd74 EAE score >0 brain
Cd74 EAE score 0 #1												Cd74 EAE score>0 #1 (score 2.5)
Section	Region	Mean tdT	Total Olig2+	Total tdT+Olig2+	%tdT+Olig2+		corpus	CH	SVZ	ventral		Section	Region	Mean tdT	Total Olig2+	Total tdT+Olig2+	%tdT+Olig2+		corpus	CH	SVZ	ventral
1	Corpus	11.784	68	0	0	DP	0	0	0	0		1	Corpus		72	0	0	DP	1	1	0	0
2	Corpus	10.538	52	0	0	Olig2	161	252	225	706		2	Corpus		62	0	0	Olig2	262	515	172	459
3	Corpus	13.344	41	0	0	Av	0	0	0	0		3	Corpus		62	0	0	Av	0.381679	0.194175	0	0
4	Corpus					N	3	6	8	8		4	Corpus		66	1	1.51515	N	4	8	8	8
1	Corpus Horn L	11.947	61	0	0	Ratio	#DIV/0!	#DIV/0!	#DIV/0!	#DIV/0!		1	Corpus Horn L		49	0	0	Ratio	0.5	0.5	0	0
2	Corpus Horn L	11.8										2	Corpus Horn L		86	1	1.16279
3	Corpus Horn L	11.8	26	0	0							3	Corpus Horn L		40	0	0
4	Corpus Horn L											4	Corpus Horn L		81	0	0
1	Corpus Horn R	11.944	52	0	0							1	Corpus Horn R		32	0	0
2	Corpus Horn R	10.457	51	0	0							2	Corpus Horn R		23	0	0
3	Corpus Horn R	12.937	29	0	0							3	Corpus Horn R		112	0	0
4	Corpus Horn R	15.809	33	0	0							4	Corpus Horn R		92	0	0
1	SVZ L	9.713	36	0	0							1	SVZ L		28	0	0
2	SVZ L	9.69	34	0	0							2	SVZ L		15	0	0
3	SVZ L	12.139	11	0	0							3	SVZ L		20	0	0
4	SVZ L	14.004	36	0	0							4	SVZ L		21	0	0
1	SVZ R	9.812	51	0	0							1	SVZ R		23	0	0
2	SVZ R	8.092	22	0	0							2	SVZ R		15	0	0
3	SVZ R	11.484	20	0	0							3	SVZ R		22	0	0
4	SVZ R	17.261	15	0	0							4	SVZ R		28	0	0
1	Ventral L	14.823	61	0	0							1	Ventral L		70	0	0
2	Ventral L	10.248	48	0	0							2	Ventral L		52	0	0
3	Ventral L	11.556	69	0	0							3	Ventral L		55	0	0
4	Ventral L	13.187	120	0	0							4	Ventral L		56	0	0
1	Ventral R	12.17	63	0	0							1	Ventral R		54	0	0
2	Ventral R	11.526	210	0	0							2	Ventral R		60	0	0
3	Ventral R	11.157	69	0	0							3	Ventral R		84	0	0
4	Ventral R	14.34	66	0	0							4	Ventral R		28	0	0
		12.0601	1344	0	0										1408	2	0.142045
				N	25											N	28
Cd74 EAE score 0 #2												Cd74 EAE score>0 #2 (score 2.5)
Section	Region	Mean tdT	Total Olig2+	Total tdT+Olig2+	%tdT+Olig2+		corpus	CH	SVZ	ventral		Section	Region	Mean tdT	Total Olig2+	Total tdT+Olig2+	%tdT+Olig2+		corpus	CH	SVZ	ventral
1	Corpus	10.801	89	0	0	DP	0	0	0	0		1	Corpus	15.838	74	0	0	DP	0	1	1	0
2	Corpus	11.231	60	0	0	Olig2	284	400	243	460		2	Corpus	19.077	47	0	0	Olig2	192	423	138	920
3	Corpus	14.218	65	0	0	Av	0	0	0	0		3	Corpus					Av	0	0.236407	0.724638	0
4	Corpus	11.275	70	0	0	N	4	7	7	8		4	Corpus	17.398	71	0	0	N	3	8	7	8
1	Corpus Horn L	11.645	50	0	0	Ratio	#DIV/0!	#DIV/0!	#DIV/0!	#DIV/0!		1	Corpus Horn L	16.959	46	0	0	Ratio	0	0.5	0.5	0
2	Corpus Horn L	9.987	71	0	0							2	Corpus Horn L	16.003	64	1	1.5625
3	Corpus Horn L	12.929	52	0	0							3	Corpus Horn L	19.186	48	0	0
4	Corpus Horn L											4	Corpus Horn L	18.584	44	0	0
1	Corpus Horn R	11.289	66	0	0							1	Corpus Horn R	15.924	48	0	0
2	Corpus Horn R	11.047	66	0	0							2	Corpus Horn R	15.146	69	0	0
3	Corpus Horn R	13.595	53	0	0							3	Corpus Horn R	24.389	38	0	0
4	Corpus Horn R	11.896	42	0	0							4	Corpus Horn R	16.384	66	0	0
1	SVZ L	10.167	43	0	0							1	SVZ L	12.988	23	0	0
2	SVZ L	10.512	40	0	0							2	SVZ L	11.478	11	0	0
3	SVZ L	11.321	21	0	0							3	SVZ L	13.541	14	0	0
4	SVZ L	11.348	31	0	0							4	SVZ L	15.194	25	0	0
1	SVZ R	10.717	48	0	0							1	SVZ R	14.637	28	1	3.57143
2	SVZ R	9.717	37	0	0							2	SVZ R	11.185	18	0	0
3	SVZ R	12.139	23	0	0							3	SVZ R
4	SVZ R											4	SVZ R	15.806	19	0	0
1	Ventral L	11.963	77	0	0							1	Ventral L	36.45	78	0	0
2	Ventral L	12.088	67	0	0							2	Ventral L	17.984	134	0	0
3	Ventral L	14.836	48	0	0							3	Ventral L	14.625	177	0	0
4	Ventral L	10.978	43	0	0							4	Ventral L	21.303	70	0	0
1	Ventral R	11.179	44	0	0							1	Ventral R	31.397	107	0	0
2	Ventral R	11.576	68	0	0							2	Ventral R	20.216	125	0	0
3	Ventral R	12.648	70	0	0							3	Ventral R	14.386	166	0	0
4	Ventral R	12.121	43	0	0							4	Ventral R	21.261	63	0	0
		11.6624	1387	0	0									17.9746	1673	2	0.119546
				N	26											N	26
Cd74 EAE score 0 #3												Cd74 EAE score>0 #3 (score 3)
Section	Region	Mean tdT	Total Olig2+	Total tdT+Olig2+	%tdT+Olig2+		corpus	CH	SVZ	ventral		Section	Region	Mean tdT	Total Olig2+	Total tdT+Olig2+	%tdT+Olig2+		corpus	CH	SVZ	ventral
1	Corpus	13.603	78	0	0	DP	0	0	0	0		1	Corpus	12.466	76	0	0	DP	0	1	0	2
2	Corpus	13.768	35	0	0	Olig2	212	397	299	423		2	Corpus	14.211	72	0	0	Olig2	293	520	215	616
3	Corpus	15.349	36	0	0	Av	0	0	0	0		3	Corpus	13.418	89	0	0	Av	0	0.192308	0	0.324675
4	Corpus	15.144	63	0	0	N	4	8	8	8		4	Corpus	14.978	56	0	0	N	4	8	8	8
1	Corpus Horn L	13.983	42	0	0	Ratio	#DIV/0!	#DIV/0!	#DIV/0!	#DIV/0!		1	Corpus Horn L	12.133	102	0	0	Ratio	0	0.333333	0	0.666667
2	Corpus Horn L	11.665	54	0	0							2	Corpus Horn L	10.576	54	0	0
3	Corpus Horn L	12.207	42	0	0							3	Corpus Horn L	12.703	61	1	1.63934
4	Corpus Horn L	14.303	55	0	0							4	Corpus Horn L	12.071	62	0	0
1	Corpus Horn R	13.469	46	0	0							1	Corpus Horn R	13.066	65	0	0
2	Corpus Horn R	13.132	71	0	0							2	Corpus Horn R	11.559	48	0	0
3	Corpus Horn R	12.824	34	0	0							3	Corpus Horn R	13.114	74	0	0
4	Corpus Horn R	14.529	53	0	0							4	Corpus Horn R	12.411	54	0	0
1	SVZ L	13.655	59	0	0							1	SVZ L	10.285	21	0	0
2	SVZ L	11.175	35	0	0							2	SVZ L	9.556	26	0	0
3	SVZ L	12.03	41	0	0							3	SVZ L	9.697	42	0	0
4	SVZ L	12.495	40	0	0							4	SVZ L	12.043	21	0	0
1	SVZ R	8.69	49	0	0							1	SVZ R	10.499	25	0	0
2	SVZ R	9.002	17	0	0							2	SVZ R	9.578	26	0	0
3	SVZ R	9.224	21	0	0							3	SVZ R	9.706	25	0	0
4	SVZ R	12.453	37	0	0							4	SVZ R	12.479	29	0	0
1	Ventral L	15.408	25	0	0							1	Ventral L	17.307	85	0	0
2	Ventral L	12.937	54	0	0							2	Ventral L	21.447	72	1	1.38889
3	Ventral L	11.807	38	0	0							3	Ventral L	9.57	56	0	0
4	Ventral L	11.515	53	0	0							4	Ventral L	11.491	69	0	0
1	Ventral R	14.34	35	0	0							1	Ventral R	15.782	67	0	0
2	Ventral R	13.475	86	0	0							2	Ventral R	16.578	101	0	0
3	Ventral R	13.139	74	0	0							3	Ventral R	14.577	75	0	0
4	Ventral R	11.346	58	0	0							4	Ventral R	10.792	91	1	1.0989
		12.7381	1331	0	0									12.6462	1644	3	0.182482
				N	28											N	28
												Cd74 EAE score>0 #4 (score 3)
												Section	Region	Mean tdT	Total Olig2+	Total tdT+Olig2+	%tdT+Olig2+		corpus	CH	SVZ	ventral
												1	Corpus					DP	1	0	3	0
												2	Corpus	15.871	19	0	0	Olig2	63	77	55	337
												3	Corpus		16	1	6.25	Av	1.5873	0	5.45455	0
												4	Corpus		28	0	0	N	3	5	4	6
												1	Corpus Horn L					Ratio	0.25	0	0.75	0
												2	Corpus Horn L
												3	Corpus Horn L	10.478	22	0	0
												4	Corpus Horn L	11.503	17	0	0
												1	Corpus Horn R
												2	Corpus Horn R	11.87	12	0	0
												3	Corpus Horn R	11.517	11	0	0
												4	Corpus Horn R	14.405	15	0	0
												1	SVZ L
												2	SVZ L
												3	SVZ L	7.798	20	0	0
												4	SVZ L	10.371	8	0	0
												1	SVZ R
												2	SVZ R	12.004	10	0	0
												3	SVZ R	10.201	17	3	17.6471
												4	SVZ R
												1	Ventral L
												2	Ventral L	13.545	52	0	0
												3	Ventral L	10.101	53	0	0
												4	Ventral L	13.686	54	0	0
												1	Ventral R
												2	Ventral R	13.116	45	0	0
												3	Ventral R	10.252	59	0	0
												4	Ventral R	12.218	74	0	0
														11.8085	532	4	0.75188
																N	18
												Cd74 EAE score>0 #5 (score 3)
												Section	Region	Mean tdT	Total Olig2+	Total tdT+Olig2+	%tdT+Olig2+		corpus	CH	SVZ	ventral
												1	Corpus	18.385	43	0	0	DP	2	3	1	0
												2	Corpus	24.035	50	2	4	Olig2	254	238	151	539
												3	Corpus	22.874	126	0	0	Av	0.787402	1.2605	0.662252	0
												4	Corpus	19.791	35	0	0	N	4	8	8	7
												1	Corpus Horn L	15.517	40	1	2.5	Ratio	0.333333	0.5	0.166667	0
												2	Corpus Horn L	16.283	25	1	4
												3	Corpus Horn L	15.113	18	1	5.55556
												4	Corpus Horn L	14.741	17	0	0
												1	Corpus Horn R	14.931	41	0	0
												2	Corpus Horn R	16.816	38	0	0
												3	Corpus Horn R	16.816	27	0	0
												4	Corpus Horn R	15.615	32	0	0
												1	SVZ L	14.1	9	0	0
												2	SVZ L	20.385	12	0	0
												3	SVZ L	13.751	34	0	0
												4	SVZ L	15.91	19	0	0
												1	SVZ R	12.239	20	1	5
												2	SVZ R	14.641	17	0	0
												3	SVZ R	19.844	22	0	0
												4	SVZ R	13.366	18	0	0
												1	Ventral L	18.964	69	0	0
												2	Ventral L	20.784	49	0	0
												3	Ventral L	20.508	54	0	0
												4	Ventral L	18.98	76	0	0
												1	Ventral R	20.04	83	0	0
												2	Ventral R	22.776	83	0	0
												3	Ventral R	18.62	125	0	0
												4	Ventral R	19.744
														17.6989	1182	6	0.507614
																N	27
												Cd74 EAE score>0 #6 (score 3.5)
												Section	Region	Mean tdT	Total Olig2+	Total tdT+Olig2+	%tdT+Olig2+		corpus	CH	SVZ	ventral
												1	Corpus	14.447	72	1	1.38889	DP	1	0	0	1
												2	Corpus	20.252	60	0	0	Olig2	272	376	254	472
												3	Corpus	23.138	96	0	0	Av	0.367647	0	0	0.211864
												4	Corpus	16.905	44	0	0	N	4	5	6	8
												1	Corpus Horn L	13.941	92	0	0	Ratio	0.5	0	0	0.5
												2	Corpus Horn L	14.877	78	0	0
												3	Corpus Horn L	16.026	66	0	0
												4	Corpus Horn L	13.37	74	0	0
												1	Corpus Horn R
												2	Corpus Horn R
												3	Corpus Horn R
												4	Corpus Horn R	12.798	66	0	0
												1	SVZ L	11.681	38	0	0
												2	SVZ L	11.28	40	0	0
												3	SVZ L	13.716	30	0	0
												4	SVZ L	11.137	53	0	0
												1	SVZ R
												2	SVZ R	13.226	57	0	0
												3	SVZ R	13.185	36	0	0
												4	SVZ R
												1	Ventral L	16.33	64	0	0
												2	Ventral L	24.501	82	0	0
												3	Ventral L	21.726	58	0	0
												4	Ventral L	17.407	49	0	0
												1	Ventral R	18.438	37	0	0
												2	Ventral R	21.758	69	0	0
												3	Ventral R	22.583	62	0	0
												4	Ventral R	17.226	51	1	1.96078
														16.5195	1374	2	0.14556
																N	23
												Cd74 EAE score>0 #7 (score 3 ataxic)
												Section	Region	Mean tdT	Total Olig2+	Total tdT+Olig2+	%tdT+Olig2+		corpus	CH	SVZ	ventral
												1	Corpus		61	0	0	DP	1	1	0	0
												2	Corpus		60	0	0	Olig2	303	145	94	365
												3	Corpus		77	1	1.2987	Av	0.330033	0.689655	0	0
												4	Corpus		105	0	0	N	4	7	4	8
												1	Corpus Horn L	14.376	18	0	0	Ratio	0.5	0.5	0	0
												2	Corpus Horn L	12.701	17	0	0
												3	Corpus Horn L	12.197	26	0	0
												4	Corpus Horn L	14.157	15	0	0
												1	Corpus Horn R	13.14	24	1	4.16667
												2	Corpus Horn R
												3	Corpus Horn R	12.795	21	0	0
												4	Corpus Horn R	13.161	24	0	0
												1	SVZ L
												2	SVZ L
												3	SVZ L	12.571	40	0	0
												4	SVZ L
												1	SVZ R
												2	SVZ R	10.377	25	0	0
												3	SVZ R	10.762	18	0	0
												4	SVZ R	10.662	11	0	0
												1	Ventral L	16.977	37	0	0
												2	Ventral L	23.742	89	0	0
												3	Ventral L	12.504	42	0	0
												4	Ventral L	13.319	37	0	0
												1	Ventral R	18.718	25	0	0
												2	Ventral R	15.685	46	0	0
												3	Ventral R	11.708	60	0	0
												4	Ventral R	13.58	29	0	0
														13.8491	907	2	0.220507
																N	23
												Cd74 EAE score>0 #8 (score 2.5 ataxic)
												Section	Region	Mean tdT	Total Olig2+	Total tdT+Olig2+	%tdT+Olig2+		corpus	CH	SVZ	ventral
												1	Corpus		34	1	2.94118	DP	2	2	1	1
												2	Corpus		23	0	0	Olig2	114	139	134	519
												3	Corpus					Av	1.75439	1.43885	0.746269	0.192678
												4	Corpus		57	1	1.75439	N	3	5	6	8
												1	Corpus Horn L	10.097	35	0	0	Ratio	0.333333	0.333333	0.166667	0.166667
												2	Corpus Horn L
												3	Corpus Horn L	12.46	20	0	0
												4	Corpus Horn L	11.317	21	0	0
												1	Corpus Horn R	10	24	0	0
												2	Corpus Horn R
												3	Corpus Horn R
												4	Corpus Horn R	10.535	39	2	5.12821
												1	SVZ L
												2	SVZ L	10.697	22	0	0
												3	SVZ L	10.825	11	0	0
												4	SVZ L
												1	SVZ R	7.997	12	1
												2	SVZ R	8.438	37	0	0
												3	SVZ R	12.212	9	0	0
												4	SVZ R	8.356	43	0	0
												1	Ventral L	11.815	53	0	0
												2	Ventral L	14.039	58	0	0
												3	Ventral L	7.499	69	0	0
												4	Ventral L	8.746	102	0	0
												1	Ventral R	12.181	37	0	0
												2	Ventral R	14.726	52	1	1.92308
												3	Ventral R	7.836	55	0	0
												4	Ventral R	8.604	93	0	0
														10.4411	906	6	0.662252
																N	21
												Cd74 EAE score>0 #10 (score 1.5)
												Section	Region	Mean tdT	Total Olig2+	Total tdT+Olig2+	%tdT+Olig2+		corpus	CH	SVZ	ventral
												1	Corpus	11.891	45	0	0	DP	0	0	0	0
												2	Corpus	11.865	23	0	0	Olig2	139	291	190	387
												3	Corpus	11.869	31	0	0	Av	0	0	0	0
												4	Corpus	12.93	40	0	0	N	4	7	8	7
												1	Corpus Horn L	10.024	50	0	0	Ratio	#DIV/0!	#DIV/0!	#DIV/0!	#DIV/0!
												2	Corpus Horn L	9.952	15	0	0
												3	Corpus Horn L	10.167	37	0	0
												4	Corpus Horn L	11.323	48	0	0
												1	Corpus Horn R	10.299	61	0	0
												2	Corpus Horn R	10.238	18	0	0
												3	Corpus Horn R
												4	Corpus Horn R	11.201	62	0	0
												1	SVZ L	8.515	11	0	0
												2	SVZ L	11.083	41	0	0
												3	SVZ L	7.903	33	0	0
												4	SVZ L	8.049	25	0	0
												1	SVZ R	9.618	25	0	0
												2	SVZ R	8.84	20	0	0
												3	SVZ R	10.673	14	0	0
												4	SVZ R	8.496	21	0	0
												1	Ventral L	13.206	77	0	0
												2	Ventral L	12.441	66	0	0
												3	Ventral L
												4	Ventral L	9.955	38	0	0
												1	Ventral R	12.946	54	0	0
												2	Ventral R	13.845	62	0	0
												3	Ventral R	11.194	40	0	0
												4	Ventral R	10.205	50	0	0
														10.7203	1007	0	0
																N	26
												Cd74 EAE score>0 #9 (score 2)
												Section	Region	Mean tdT	Total Olig2+	Total tdT+Olig2+	%tdT+Olig2+		corpus	CH	SVZ	ventral
												1	Corpus	12.766	38	0	0	DP	3	3	1	2
												2	Corpus	14.551	18	2	11.1111	Olig2	93	127	77	227
												3	Corpus	14.292	11	1	9.09091	Av	3.22581	2.3622	1.2987	0.881057
												4	Corpus	13.649	26	0	0	N	4	6	3	6
												1	Corpus Horn L					Ratio	0.333333	0.333333	0.111111	0.222222
												2	Corpus Horn L	14	14	3	21.4286
												3	Corpus Horn L	16	16	0	0
												4	Corpus Horn L
												1	Corpus Horn R	27	27	0	0
												2	Corpus Horn R	20	20	0	0
												3	Corpus Horn R	10	10	0	0
												4	Corpus Horn R	40	40	0	0
												1	SVZ L
												2	SVZ L
												3	SVZ L		26	0	0
												4	SVZ L
												1	SVZ R	11.711	21	0	0
												2	SVZ R
												3	SVZ R
												4	SVZ R	10.869	30	1	3.33333
												1	Ventral L	31	31	0	0
												2	Ventral L	38	38	0	0
												3	Ventral L
												4	Ventral L	54	54	0	0
												1	Ventral R	27	27	2	7.40741
												2	Ventral R	33	33	0	0
												3	Ventral R
												4	Ventral R	44	44	0	0
														23.991	524	9	1.71756
																N	19
												Cd74 EAE score>0 #11 (score 1.5)
												Section	Region	Mean tdT	Total Olig2+	Total tdT+Olig2+	%tdT+Olig2+		corpus	CH	SVZ	ventral
												1	Corpus		42	0	0	DP	0	6	6	10
												2	Corpus		16	0	0	Olig2	189	361	635	713
												3	Corpus		131	0	0	Av	0	1.66205	0.944882	1.40252
												4	Corpus					N	3	3	4	6
												1	Corpus Horn L					Ratio	0	0.272727	0.272727	0.454545
												2	Corpus Horn L		175	1	0.571429
												3	Corpus Horn L		108	3	2.77778
												4	Corpus Horn L
												1	Corpus Horn R
												2	Corpus Horn R
												3	Corpus Horn R		78	2	2.5641
												4	Corpus Horn R
												1	SVZ L
												2	SVZ L		104	2	1.92308
												3	SVZ L		186	0	0
												4	SVZ L
												1	SVZ R
												2	SVZ R		171	0	0
												3	SVZ R		174	4	2.29885
												4	SVZ R
												1	Ventral L		67	2	2.98507
												2	Ventral L		73	1	1.36986
												3	Ventral L		245	0	0
												4	Ventral L
												1	Ventral R		67	1	1.49254
												2	Ventral R		87	3	3.44828
												3	Ventral R		174	3	1.72414
												4	Ventral R
														#DIV/0!	1898	22	1.15911
																N	16

## Sheet: B2m brain ATCUP
B2m ATCUP												B2m AT											B2m CUP
B2m ATCUP #1 (score 2, ataxia)												B2m AT #1 (score 3)											B2m CUP #1
Section	Region	Total Olig2+	Total tdT+Olig2+	%tdT+Olig2+	Lesion?		corpus	CH	SVZ	ventral		Section	Region	Total Olig2+	Total tdT+Olig2+	%tdT+Olig2+		corpus	CH	SVZ	ventral		Section	Region	Total Olig2+	Total tdT+Olig2+	%tdT+Olig2+		corpus	CH	SVZ	ventral
1	Corpus	163	16	9.81595	N	DP	118	99	5	225		1	Corpus	48	3	6.25	DP	12	1	4	23		1	Corpus	86	0	0	DP	0	8	0	2
2	Corpus	151	45	29.8013	N	Olig2	522	602	116	742		2	Corpus	153	7	4.57516	Olig2	310	674	346	358		2	Corpus	208	0	0	Olig2	822	1167	240	856
3	Corpus	116	22	18.9655	N	Av	22.6054	16.4452	4.31034	30.3235		3	Corpus	63	0	0	Av	3.87097	0.148368	1.15607	6.42458		3	Corpus	300	0	0	Av	0	0.685518	0	0.233645
4	Corpus	92	35	38.0435	Y	N	4	8	5	8		4	Corpus	46	2	4.34783	N	4	5	5	5		4	Corpus	228	0	0	N	4	8	7	8
1	Corpus Horn L	56	14	25	Y	Ratio	0.263982	0.221477	0.0111857	0.503356		1	Corpus Horn L				Ratio	0.3	0.025	0.1	0.575		1	Corpus Horn L	156	1	0.641026	Ratio	0	0.8	0	0.2
2	Corpus Horn L	100	5	5	Y							2	Corpus Horn L										2	Corpus Horn L	91	0	0
3	Corpus Horn L	109	4	3.66972	Y							3	Corpus Horn L	218	0	0							3	Corpus Horn L	172	0	0
4	Corpus Horn L	35	6	17.1429	N		lesion	nonlesion				4	Corpus Horn L	263	1	0.380228							4	Corpus Horn L	197	0	0
1	Corpus Horn R	68	13	19.1176	Y	DP	211	236				1	Corpus Horn R										1	Corpus Horn R	206	3	1.45631
2	Corpus Horn R	88	16	18.1818	Y	Olig2	1132	850				2	Corpus Horn R	89	0	0							2	Corpus Horn R	63	1	1.5873
3	Corpus Horn R	89	20	22.4719	Y	Av	18.6396	27.7647				3	Corpus Horn R	43	0	0							3	Corpus Horn R	124	1	0.806452
4	Corpus Horn R	57	21	36.8421	Y	N	16	9				4	Corpus Horn R	61	0	0							4	Corpus Horn R	158	2	1.26582
1	SVZ L	30	2	6.66667	Y							1	SVZ L										1	SVZ L	32	0	0
2	SVZ L											2	SVZ L	82	0	0							2	SVZ L	45	0	0
3	SVZ L	17	0	0	Y							3	SVZ L										3	SVZ L	53	0	0
4	SVZ L											4	SVZ L	68	1	1.47059							4	SVZ L	30	0	0
1	SVZ R	30	2	6.66667	N							1	SVZ R										1	SVZ R
2	SVZ R	9	0	0	Y							2	SVZ R	94	0	0							2	SVZ R	34	0	0
3	SVZ R	30	1	3.33333	N							3	SVZ R	36	3	8.33333							3	SVZ R	16	0	0
4	SVZ R											4	SVZ R	66	0	0							4	SVZ R	30	0	0
1	Ventral L	76	17	22.3684	Y							1	Ventral L										1	Ventral L	58	0	0
2	Ventral L	96	27	28.125	Y							2	Ventral L	84	8	9.52381							2	Ventral L	116	0	0
3	Ventral L	81	36	44.4444	N							3	Ventral L										3	Ventral L	130	0	0
4	Ventral L	184	94	51.087	N							4	Ventral L	48	2	4.16667							4	Ventral L	127	1	0.787402
1	Ventral R	74	2	2.7027	Y							1	Ventral R										1	Ventral R	18	0	0
2	Ventral R	89	10	11.236	Y							2	Ventral R	44	3	6.81818							2	Ventral R	125	0	0
3	Ventral R	82	25	30.4878	Y							3	Ventral R	73	2	2.73973							3	Ventral R	79	1	1.26582
4	Ventral R	60	14	23.3333	N							4	Ventral R	109	8	7.33945							4	Ventral R	203	0	0
		1982	447	22.553										1688	40	2.36967									3085	10	0.324149
			N	25											N	19										N	27
B2m ATCUP #2 (score 3)												B2m AT #2 (score 3.5)											B2m CUP #2
Section	Region	Total Olig2+	Total tdT+Olig2+	%tdT+Olig2+	Lesion?		corpus	CH	SVZ	ventral		Section	Region	Total Olig2+	Total tdT+Olig2+	%tdT+Olig2+		corpus	CH	SVZ	ventral		Section	Region	Total Olig2+	Total tdT+Olig2+	%tdT+Olig2+		corpus	CH	SVZ	ventral
1	Corpus					DP	478	515	0	59		1	Corpus	44	0	0	DP	1	8	4	18		1	Corpus				DP	1	2	0	0
2	Corpus	376	108	28.7234	Y	Olig2	982	1437	213	733		2	Corpus	180	0	0	Olig2	326	821	499	638		2	Corpus	280	1	0.357143	Olig2	819	891	119	240
3	Corpus	340	187	55	Y	Av	48.6762	35.8386	0	8.04911		3	Corpus				Av	0.306748	0.974421	0.801603	2.82132		3	Corpus	290	0	0	Av	0.1221	0.224467	0	0
4	Corpus	266	183	68.797	Y	N	3	6	5	8		4	Corpus	102	1	0.980392	N	3	6	4	7		4	Corpus	249	0	0	N	3	6	5	6
1	Corpus Horn L					Ratio	0.454373	0.489544	0	0.0560837		1	Corpus Horn L				Ratio	0.0322581	0.258065	0.129032	0.580645		1	Corpus Horn L				Ratio	0.333333	0.666667	0	0
2	Corpus Horn L	327	133	40.6728	Y							2	Corpus Horn L	69	2	2.89855							2	Corpus Horn L	80	0	0
3	Corpus Horn L	232	81	34.9138	Y							3	Corpus Horn L	212	0	0							3	Corpus Horn L	222	1	0.45045
4	Corpus Horn L	201	101	50.2488	Y		lesion	nonlesion				4	Corpus Horn L	97	0	0							4	Corpus Horn L	137	1	0.729927
1	Corpus Horn R	94	1	1.06383	N	DP	999	53				1	Corpus Horn R	124	5	4.03226							1	Corpus Horn R
2	Corpus Horn R	301	104	34.5515	Y	Olig2	2514	851				2	Corpus Horn R	52	1	1.92308							2	Corpus Horn R	154	0	0
3	Corpus Horn R	282	95	33.6879	Y	Av	39.7375	6.22797				3	Corpus Horn R	125	0	0							3	Corpus Horn R	126	0	0
4	Corpus Horn R					N	10	12				4	Corpus Horn R	142	0								4	Corpus Horn R	172	0	0
1	SVZ L											1	SVZ L										1	SVZ L
2	SVZ L	43	0	0	N							2	SVZ L	120	4	3.33333							2	SVZ L	33	0	0
3	SVZ L	41	0	0	N							3	SVZ L	120	0	0							3	SVZ L	25	0	0
4	SVZ L	54	0	0	N							4	SVZ L										4	SVZ L	14	0	0
1	SVZ R											1	SVZ R										1	SVZ R
2	SVZ R	39	0	0	N							2	SVZ R	129	0	0							2	SVZ R
3	SVZ R	36	0	0	N							3	SVZ R	130	0	0							3	SVZ R	20	0	0
4	SVZ R											4	SVZ R										4	SVZ R	27	0	0
1	Ventral L	71	0	0	N							1	Ventral L	89	1	1.1236							1	Ventral L	46	0	0
2	Ventral L	113	3	2.65487	Y							2	Ventral L	115	5	4.34783							2	Ventral L	33	0	0
3	Ventral L	76	4	5.26316	Y							3	Ventral L	140	2	1.42857							3	Ventral L
4	Ventral L	75	9	12	N							4	Ventral L	49	0	0							4	Ventral L	47	0	0
1	Ventral R	68	8	11.7647	N							1	Ventral R	83	1	1.20482							1	Ventral R	29	0	0
2	Ventral R	138	20	14.4928	N							2	Ventral R	114	9	7.89474							2	Ventral R
3	Ventral R	111	7	6.30631	N							3	Ventral R										3	Ventral R	43	0	0
4	Ventral R	81	8	9.87654	N							4	Ventral R	48	0	0							4	Ventral R	42	0	0
		3365	1052	31.263										2284	31	1.35727									2069	3	0.144998
			N	22											N	20										N	20
B2m ATCUP #3 (score 2, ataxia)												B2m AT #3 (score 2.5)											B2m CUP #3
Section	Region	Total Olig2+	Total tdT+Olig2+	%tdT+Olig2+	Lesion?		corpus	CH	SVZ	ventral		Section	Region	Total Olig2+	Total tdT+Olig2+	%tdT+Olig2+		corpus	CH	SVZ	ventral		Section	Region	Total Olig2+	Total tdT+Olig2+	%tdT+Olig2+		corpus	CH	SVZ	ventral
1	Corpus	245	149	60.8163	Y	DP	318	156	2	92		1	Corpus				DP	0	16	1	3		1	Corpus	104	4	3.84615	DP	6	7	2	3
2	Corpus	122	34	27.8689	N	Olig2	714	968	159	1071		2	Corpus	180	0	0	Olig2	489	1090	326	557		2	Corpus	119	2	1.68067	Olig2	491	452	242	356
3	Corpus	150	65	43.3333	Y	Av	44.5378	16.1157	1.25786	8.5901		3	Corpus	194	0	0	Av	0	1.46789	0.306748	0.5386		3	Corpus	79	0	0	Av	1.222	1.54867	0.826446	0.842697
4	Corpus	197	70	35.533	Y	N	4	8	5	8		4	Corpus	115	0	0	N	3	8	3	8		4	Corpus	189	0	0	N	4	8	7	8
1	Corpus Horn L	201	51	25.3731	Y	Ratio	0.559859	0.274648	0.00352113	0.161972		1	Corpus Horn L	78	0	0	Ratio	0	0.8	0.05	0.15		1	Corpus Horn L	113	1	0.884956	Ratio	0.333333	0.388889	0.111111	0.166667
2	Corpus Horn L	71	4	5.6338	N							2	Corpus Horn L	199	1	0.502513							2	Corpus Horn L	33	0	0
3	Corpus Horn L	98	26	26.5306	N							3	Corpus Horn L	288	0	0							3	Corpus Horn L	91	1	1.0989
4	Corpus Horn L	75	4	5.33333	N		lesion	nonlesion				4	Corpus Horn L	99	0	0							4	Corpus Horn L	114	3	2.63158
1	Corpus Horn R	307	54	17.5896	N	DP	356	212				1	Corpus Horn R	73	9	12.3288							1	Corpus Horn R	23	0	0
2	Corpus Horn R	67	6	8.95522	N	Olig2	1059	1853				2	Corpus Horn R	173	6	3.46821							2	Corpus Horn R	23	0	0
3	Corpus Horn R	77	6	7.79221	N	Av	33.6166	11.4409				3	Corpus Horn R	135	0	0							3	Corpus Horn R	15	0	0
4	Corpus Horn R	72	5	6.94444	N	N	6	19				4	Corpus Horn R	45	0	0							4	Corpus Horn R	40	2	5
1	SVZ L	18	1	5.55556	N							1	SVZ L	101	0	0							1	SVZ L	31	0	0
2	SVZ L	75	1	1.33333	N							2	SVZ L										2	SVZ L	64	0	0
3	SVZ L											3	SVZ L	68	0	0							3	SVZ L	65	1	1.53846
4	SVZ L											4	SVZ L										4	SVZ L
1	SVZ R	19	0	0	N							1	SVZ R										1	SVZ R	15	0	0
2	SVZ R	23	0	0	N							2	SVZ R										2	SVZ R	30	0	0
3	SVZ R	24	0	0	N							3	SVZ R	157	1	0.636943							3	SVZ R	30	1	3.33333
4	SVZ R											4	SVZ R										4	SVZ R	7	0	0
1	Ventral L	153	14	9.15033	Y							1	Ventral L	42	0	0							1	Ventral L	32	0	0
2	Ventral L	121	5	4.13223	N							2	Ventral L	49	1	2.04082							2	Ventral L	65	0	0
3	Ventral L	170	4	2.35294	N							3	Ventral L	91	0	0							3	Ventral L	62	2	3.22581
4	Ventral L	163	2	1.22699	N							4	Ventral L	39	0	0							4	Ventral L	50	0	0
1	Ventral R	113	7	6.19469	Y							1	Ventral R	59	0	0							1	Ventral R	20	0	0
2	Ventral R	92	7	7.6087	N							2	Ventral R	44	0	0							2	Ventral R	42	0	0
3	Ventral R	147	30	20.4082	N							3	Ventral R	78	2	2.5641							3	Ventral R	44	0	0
4	Ventral R	112	23	20.5357	N							4	Ventral R	155	0	0							4	Ventral R	41	1	2.43902
		2912	568	19.5055										2462	20	0.812348									1541	18	1.16807
			N	25											N	22										N	27
B2m ATCUP #4 (score 1.5)												B2m AT #4 (score 3.5)
Section	Region	Total Olig2+	Total tdT+Olig2+	%tdT+Olig2+	Lesion?		corpus	CH	SVZ	ventral		Section	Region	Total Olig2+	Total tdT+Olig2+	%tdT+Olig2+		corpus	CH	SVZ	ventral
1	Corpus	45	3	6.66667	N	DP	6	24	0	48		1	Corpus				DP	9	9	3	22
2	Corpus	73	3	4.10959	N	Olig2	197	687	196	500		2	Corpus	70	7	10	Olig2	283	522	104	277
3	Corpus					Av	3.04569	3.49345	0	9.6		3	Corpus	148	2	1.35135	Av	3.18021	1.72414	2.88462	7.94224
4	Corpus	79	0	0	N	N	3	6	6	6		4	Corpus	65	0	0	N	3	6	7	6
1	Corpus Horn L	66	1	1.51515	N	Ratio	0.0769231	0.307692	0	0.615385		1	Corpus Horn L				Ratio	0.209302	0.209302	0.0697674	0.511628
2	Corpus Horn L	120	0	0	N							2	Corpus Horn L	63	0	0
3	Corpus Horn L											3	Corpus Horn L	117	0	0
4	Corpus Horn L	212	13	6.13208	N		lesion	nonlesion				4	Corpus Horn L	98	0	0
1	Corpus Horn R	81	2	2.46914	N	DP	38	40				1	Corpus Horn R	53	0	0
2	Corpus Horn R	122	2	1.63934	N	Olig2	428	1152				2	Corpus Horn R	66	5	7.57576
3	Corpus Horn R					Av	8.8785	3.47222				3	Corpus Horn R	125	4	3.2
4	Corpus Horn R	86	6	6.97674	N	N	5	16				4	Corpus Horn R
1	SVZ L	24	0	0	N							1	SVZ L	11	2	18.1818
2	SVZ L	51	0	0	N							2	SVZ L	12	1	8.33333
3	SVZ L											3	SVZ L	25	0	0
4	SVZ L	28	0	0	N							4	SVZ L	15	0	0
1	SVZ R	29	0	0	N							1	SVZ R	8	0	0
2	SVZ R	34	0	0	N							2	SVZ R	14	0	0
3	SVZ R											3	SVZ R	19	0	0
4	SVZ R	30	0	0	N							4	SVZ R
1	Ventral L	44	2	4.54545	Y							1	Ventral L	34	1	2.94118
2	Ventral L	95	7	7.36842	Y							2	Ventral L	39	3	7.69231
3	Ventral L											3	Ventral L	72	4	5.55556
4	Ventral L	107	20	18.6916	Y							4	Ventral L
1	Ventral R	69	2	2.89855	Y							1	Ventral R	49	3	6.12245
2	Ventral R	72	10	13.8889	N							2	Ventral R	30	0	0
3	Ventral R											3	Ventral R	53	11	20.7547
4	Ventral R	113	7	6.19469	Y							4	Ventral R
		1580	78	4.93671										1186	43	3.62563
			N	21											N	22
B2m ATCUP #5 (score 2)
Section	Region	Total Olig2+	Total tdT+Olig2+	%tdT+Olig2+	Lesion?		corpus	CH	SVZ	ventral
1	Corpus	236	0	0	N	DP	0	2	0	65
2	Corpus	150	0	0	N	Olig2	562	867	151	896
3	Corpus	123	0	0	N	Av	0	0.230681	0	7.25446
4	Corpus	53	0	0	N	N	4	8	8	8
1	Corpus Horn L	201	0	0	Y	Ratio	0	0.0298507	0	0.970149
2	Corpus Horn L	108	0	0	N
3	Corpus Horn L	82	0	0	N
4	Corpus Horn L	77	0	0	Y		lesion	nonlesion
1	Corpus Horn R	135	0	0	Y	DP	34	33
2	Corpus Horn R	82	1	1.21951	Y	Olig2	1000	1476
3	Corpus Horn R	105	0	0	N	Av	3.4	2.23577
4	Corpus Horn R	77	1	1.2987	Y	N	9	19
1	SVZ L	38	0	0	Y
2	SVZ L	17	0	0	N
3	SVZ L	17	0	0	N
4	SVZ L	14	0	0	N
1	SVZ R	26	0	0	N
2	SVZ R	12	0	0	N
3	SVZ R	16	0	0	N
4	SVZ R	11	0	0	N
1	Ventral L	107	0	0	N
2	Ventral L	124	17	13.7097	Y
3	Ventral L	90	23	25.5556	N
4	Ventral L	90	4	4.44444	N
1	Ventral R	173	0	0	Y
2	Ventral R	93	15	16.129	Y
3	Ventral R	149	2	1.34228	N
4	Ventral R	70	4	5.71429	N
		2476	67	2.70598
			N	28
B2m ATCUP #6 (score 2)
Section	Region	Total Olig2+	Total tdT+Olig2+	%tdT+Olig2+	Lesion?		corpus	CH	SVZ	ventral
1	Corpus					DP	17	45	11	309
2	Corpus	128	1	0.78125	N	Olig2	251	308	130	927
3	Corpus	84	9	10.7143	N	Av	6.77291	14.6104	8.46154	33.3333
4	Corpus	39	7	17.9487	N	N	3	5	7	8
1	Corpus Horn L					Ratio	0.0445026	0.117801	0.0287958	0.808901
2	Corpus Horn L	29	1	3.44828	N
3	Corpus Horn L	83	11	13.253	N
4	Corpus Horn L						lesion	nonlesion
1	Corpus Horn R					DP	113	269
2	Corpus Horn R	47	9	19.1489	N	Olig2	442	1174
3	Corpus Horn R	95	14	14.7368	N	Av	25.5656	22.9131
4	Corpus Horn R	54	10	18.5185	Y	N	6	17
1	SVZ L	25	4	16	Y
2	SVZ L	27	1	3.7037	N
3	SVZ L	21	1	4.7619	N
4	SVZ L	13	0	0	N
1	SVZ R	23	5	21.7391	Y
2	SVZ R	2	0	0	N
3	SVZ R	19	0	0	N
4	SVZ R
1	Ventral L	83	20	24.0964	Y
2	Ventral L	98	25	25.5102	N
3	Ventral L	121	51	42.1488	N
4	Ventral L	141	39	27.6596	Y
1	Ventral R	139	43	30.9353	N
2	Ventral R	108	49	45.3704	N
3	Ventral R	116	35	30.1724	Y
4	Ventral R	121	47	38.843	N
		1616	382	23.6386
			N	23

## Sheet: CD74 brain ATCUP
Cd74 ATCUP												Cd74 AT											Cd74 CUP
Cd74 ATCUP #1 (score 3)												Cd74 AT #1 (score 3)											Cd74CUP #1
Section	Region	Total Olig2+	Total tdT+Olig2+	%tdT+Olig2+	Lesion?		corpus	CH	SVZ	ventral		Section	Region	Total Olig2+	Total tdT+Olig2+	%tdT+Olig2+		corpus	CH	SVZ	ventral		Section	Region	Total Olig2+	Total tdT+Olig2+	%tdT+Olig2+		corpus	CH	SVZ	ventral
1	Corpus	60	1	1.66667	Y	DP	8	9	1	3		1	Corpus	32	0	0	DP	1	3	3	0		1	Corpus				DP	0	0	0	0
2	Corpus	155	1	0.645161	Y	Olig2	399	644	128	957		2	Corpus	104	0	0	Olig2	373	1143	440	991		2	Corpus	205	0	0	Olig2	935	918	373	976
3	Corpus	140	5	3.57143	Y	Av	2.00501	1.39752	0.78125	0.31348		3	Corpus	65	1	1.53846	Av	0.268097	0.262467	0.681818	0		3	Corpus	337	0	0	Av	0	0	0	0
4	Corpus	44	1	2.27273	N	N	4	7	6	8		4	Corpus	172	0	0	N	4	8	8	8		4	Corpus	393	0	0	N	3	6	7	8
1	Corpus Horn L	165	0	0	Y	Ratio	0.380952	0.428571	0.047619	0.142857		1	Corpus Horn L	106	0	0	Ratio	0.142857	0.428571	0.428571	0		1	Corpus Horn L				Ratio	#DIV/0!	#DIV/0!	#DIV/0!	#DIV/0!
2	Corpus Horn L	11	0	0	N							2	Corpus Horn L	151	2	1.3245							2	Corpus Horn L	188	0	0
3	Corpus Horn L	56	2	3.57143	N							3	Corpus Horn L	136	0	0							3	Corpus Horn L	98	0	0
4	Corpus Horn L						lesion	nonlesion				4	Corpus Horn L	150	0	0							4	Corpus Horn L	153	0	0
1	Corpus Horn R	166	3	1.80723	N	DP	10	11				1	Corpus Horn R	111	1	0.900901							1	Corpus Horn R
2	Corpus Horn R	29	2	6.89655	N	Olig2	872	1256				2	Corpus Horn R	128	0	0							2	Corpus Horn R	229	0	0
3	Corpus Horn R	158	1	0.632911	Y	Av	1.14679	0.875796				3	Corpus Horn R	167	0	0							3	Corpus Horn R	133	0	0
4	Corpus Horn R	59	1	1.69492	N	N	8	17				4	Corpus Horn R	194	0	0							4	Corpus Horn R	117	0	0
1	SVZ L	26	0	0	N							1	SVZ L	53	0	0							1	SVZ L	44	0	0
2	SVZ L	9	0	0	N							2	SVZ L	49	3	6.12245							2	SVZ L	52	0	0
3	SVZ L	31	0	0	N							3	SVZ L	26	0	0							3	SVZ L	50	0	0
4	SVZ L											4	SVZ L	87	0	0							4	SVZ L	33	0	0
1	SVZ R	26	1	3.84615	N							1	SVZ R	65	0	0							1	SVZ R
2	SVZ R	24	0	0	N							2	SVZ R	59	0	0							2	SVZ R	84	0	0
3	SVZ R	12	0	0	N							3	SVZ R	37	0	0							3	SVZ R	55	0	0
4	SVZ R											4	SVZ R	64	0	0							4	SVZ R	55	0	0
1	Ventral L	56	1	1.78571	Y							1	Ventral L	128	0	0							1	Ventral L	54	0	0
2	Ventral L	156	0	0	N							2	Ventral L	125	0	0							2	Ventral L	53	0	0
3	Ventral L	121	0	0	N							3	Ventral L	89	0	0							3	Ventral L	119	0	0
4	Ventral L	86	1	1.16279	Y							4	Ventral L	155	0	0							4	Ventral L	218	0	0
1	Ventral R	52	0	0	Y							1	Ventral R	155	0	0							1	Ventral R	62	0	0
2	Ventral R	177	1	0.564972	N							2	Ventral R	131	0	0							2	Ventral R	52	0	0
3	Ventral R	161	0	0	N							3	Ventral R	76	0	0							3	Ventral R	139	0	0
4	Ventral R	148	0	0	N							4	Ventral R	132	0	0							4	Ventral R	279	0	0
		2128	21	0.986842										2947	7	0.23753									3202	0	0
			N	25											N	28										N	24
Cd74 ATCUP #2 (score 3.5)												Cd74 AT #2 (score 3.5)											Cd74CUP #2
Section	Region	Total Olig2+	Total tdT+Olig2+	%tdT+Olig2+	Lesion?		corpus	CH	SVZ	ventral		Section	Region	Total Olig2+	Total tdT+Olig2+	%tdT+Olig2+		corpus	CH	SVZ	ventral		Section	Region	Total Olig2+	Total tdT+Olig2+	%tdT+Olig2+		corpus	CH	SVZ	ventral
1	Corpus	44	0	0	Y	DP	47	13	0	0		1	Corpus	103	0	0	DP	0	2	0	0		1	Corpus	211	0	0	DP	0	0	0	0
2	Corpus	73	0	0	Y	Olig2	473	237	129	738		2	Corpus	100	0	0	Olig2	311	985	686	563		2	Corpus	142	0	0	Olig2	353	597	330	448
3	Corpus	162	19	11.7284	Y	Av	9.93658	5.48523	0	0		3	Corpus	108	0	0	Av	0	0.203046	0	0		3	Corpus				Av	0	0	0	0
4	Corpus	194	28	14.433	Y	N	4	8	7	8		4	Corpus				N	3	6	6	8		4	Corpus				N	2	4	4	4
1	Corpus Horn L	10	0	0	N	Ratio	0.783333	0.216667	0	0		1	Corpus Horn L	163	1	0.613497	Ratio	0	1	0	0		1	Corpus Horn L	232	0	0	Ratio	#DIV/0!	#DIV/0!	#DIV/0!	#DIV/0!
2	Corpus Horn L	10	0	0	N							2	Corpus Horn L										2	Corpus Horn L	150	0	0
3	Corpus Horn L	26	1	3.84615	N							3	Corpus Horn L	109	0	0							3	Corpus Horn L
4	Corpus Horn L	86	10	11.6279	Y		lesion	nonlesion				4	Corpus Horn L	171	1	0.584795							4	Corpus Horn L
1	Corpus Horn R	17	0	0	N	DP	57	3				1	Corpus Horn R	212	0	0							1	Corpus Horn R	86	0	0
2	Corpus Horn R	34	0	0	N	Olig2	875	702				2	Corpus Horn R										2	Corpus Horn R	129	0	0
3	Corpus Horn R	19	0	0	Y	Av	6.51429	0.42735				3	Corpus Horn R	182	0	0							3	Corpus Horn R
4	Corpus Horn R	35	2	5.71429	N	N	10	17				4	Corpus Horn R	148	0	0							4	Corpus Horn R
1	SVZ L	10	0	0	N							1	SVZ L	113	0	0							1	SVZ L	182	0	0
2	SVZ L	12	0	0	N							2	SVZ L										2	SVZ L	31	0	0
3	SVZ L	24	0	0	N							3	SVZ L	35	0	0							3	SVZ L
4	SVZ L											4	SVZ L	252	0	0							4	SVZ L
1	SVZ R	32	0	0	N							1	SVZ R	158	0	0							1	SVZ R	53	0	0
2	SVZ R	18	0	0	N							2	SVZ R										2	SVZ R	64	0	0
3	SVZ R	22	0	0	N							3	SVZ R	26	0	0							3	SVZ R
4	SVZ R	11	0	0	N							4	SVZ R	102	0	0							4	SVZ R
1	Ventral L	109	0	0	N							1	Ventral L	32	0	0							1	Ventral L	159	0	0
2	Ventral L	66	0	0	Y							2	Ventral L	71	0	0							2	Ventral L	70	0	0
3	Ventral L	60	0	0	N							3	Ventral L	81	0	0							3	Ventral L
4	Ventral L	132	0	0	N							4	Ventral L	65	0	0							4	Ventral L
1	Ventral R	57	0	0	Y							1	Ventral R	77	0	0							1	Ventral R	128	0	0
2	Ventral R	52	0	0	Y							2	Ventral R	63	0	0							2	Ventral R	91	0	0
3	Ventral R	122	0	0	Y							3	Ventral R	75	0	0							3	Ventral R
4	Ventral R	140	0	0	N							4	Ventral R	99	0	0							4	Ventral R
		1577	60	3.80469										2545	2	0.0785855									1728	0	0
			N	27											N	23										N	14
Cd74 ATCUP #3 (score 1.5)												Cd74 AT #3 (score 3.5)											Cd74CUP #3
Section	Region	Total Olig2+	Total tdT+Olig2+	%tdT+Olig2+	Lesion?		corpus	CH	SVZ	ventral		Section	Region	Total Olig2+	Total tdT+Olig2+	%tdT+Olig2+		corpus	CH	SVZ	ventral		Section	Region	Total Olig2+	Total tdT+Olig2+	%tdT+Olig2+		corpus	CH	SVZ	ventral
1	Corpus	413	4	0.968523	Y	DP	9	7	0	1		1	Corpus				DP	0	0	0	0		1	Corpus	145	0	0	DP	0	0	0	0
2	Corpus	354	0	0	N	Olig2	1205	1168	246	984		2	Corpus	30	0	0	Olig2	236	332	454	629		2	Corpus	346	0	0	Olig2	812	1132	299	502
3	Corpus	210	2	0.952381	Y	Av	0.746888	0.599315	0	0.101626		3	Corpus	36	0	0	Av	0	0	0	0		3	Corpus	157	0	0	Av	0	0	0	0
4	Corpus	228	3	1.31579	Y	N	4	8	8	8		4	Corpus	170	0	0	N	3	3	7	8		4	Corpus	164	0	0	N	4	8	8	8
1	Corpus Horn L	191	1	0.52356	Y	Ratio	0.529412	0.411765	0	0.0588235		1	Corpus Horn L				Ratio	#DIV/0!	#DIV/0!	#DIV/0!	#DIV/0!		1	Corpus Horn L	162	0	0	Ratio	#DIV/0!	#DIV/0!	#DIV/0!	#DIV/0!
2	Corpus Horn L	139	0	0	Y							2	Corpus Horn L										2	Corpus Horn L	122	0	0
3	Corpus Horn L	100	1	1	N							3	Corpus Horn L										3	Corpus Horn L	165	0	0
4	Corpus Horn L	231	3	1.2987	Y		lesion	nonlesion				4	Corpus Horn L										4	Corpus Horn L	176	0	0
1	Corpus Horn R	175	2	1.14286	N	DP	13	4				1	Corpus Horn R										1	Corpus Horn R	100	0	0
2	Corpus Horn R	145	0	0	N	Olig2	1788	1815				2	Corpus Horn R	102	0	0							2	Corpus Horn R	87	0	0
3	Corpus Horn R	102	0	0	N	Av	0.727069	0.220386				3	Corpus Horn R	134	0	0							3	Corpus Horn R	163	0	0
4	Corpus Horn R	85	0	0	N	N	10	18				4	Corpus Horn R	96	0	0							4	Corpus Horn R	157	0	0
1	SVZ L	24	0	0	N							1	SVZ L	73	0	0							1	SVZ L	29	0	0
2	SVZ L	39	0	0	N							2	SVZ L	56	0	0							2	SVZ L	27	0	0
3	SVZ L	41	0	0	N							3	SVZ L	41	0	0							3	SVZ L	40	0	0
4	SVZ L	42	0	0	N							4	SVZ L	94	0	0							4	SVZ L	53	0	0
1	SVZ R	17	0	0	N							1	SVZ R										1	SVZ R	30	0	0
2	SVZ R	15	0	0	N							2	SVZ R	47	0	0							2	SVZ R	33	0	0
3	SVZ R	42	0	0	N							3	SVZ R	70	0	0							3	SVZ R	38	0	0
4	SVZ R	26	0	0	N							4	SVZ R	73	0	0							4	SVZ R	49	0	0
1	Ventral L	146	0	0	N							1	Ventral L	47	0	0							1	Ventral L	62	0	0
2	Ventral L	80	0	0	Y							2	Ventral L	102	0	0							2	Ventral L	103	0	0
3	Ventral L	63	0	0	Y							3	Ventral L	166	0	0							3	Ventral L	52	0	0
4	Ventral L	243	1	0.411523	N							4	Ventral L	52	0	0							4	Ventral L	48	0	0
1	Ventral R	121	0	0	N							1	Ventral R	73	0	0							1	Ventral R	50	0	0
2	Ventral R	79	0	0	Y							2	Ventral R	54	0	0							2	Ventral R	60	0	0
3	Ventral R	98	0	0	N							3	Ventral R	57	0	0							3	Ventral R	65	0	0
4	Ventral R	154	0	0	Y							4	Ventral R	78	0	0							4	Ventral R	62	0	0
		3603	17	0.471829										1651	0	0									2745	0	0
			N	28											N	21										N	28
Cd74 ATCUP #4 (score 3)												Cd74 AT #4 (score 4)
Section	Region	Total Olig2+	Total tdT+Olig2+	%tdT+Olig2+	Lesion?		corpus	CH	SVZ	ventral		Section	Region	Total Olig2+	Total tdT+Olig2+	%tdT+Olig2+		corpus	CH	SVZ	ventral
1	Corpus	85	0	0	N	DP	1	2	2	1		1	Corpus	83	0	0	DP	0	0	1	0
2	Corpus	131	1	0.763359	Y	Olig2	733	990	181	1526		2	Corpus	177	0	0	Olig2	687	947	565	1234
3	Corpus	218	0	0	N	Av	0.136426	0.20202	1.10497	0.0655308		3	Corpus	159	0	0	Av	0	0	0.176991	0
4	Corpus	299	0	0	N	N	4	8	7	8		4	Corpus	268	0	0	N	4	6	8	8
1	Corpus Horn L	102	1	0.980392	Y	Ratio	0.166667	0.333333	0.333333	0.166667		1	Corpus Horn L				Ratio	0	0	1	0
2	Corpus Horn L	122	0	0	Y							2	Corpus Horn L	145	0	0
3	Corpus Horn L	88	1	1.13636	Y							3	Corpus Horn L	208	0	0
4	Corpus Horn L	154	0	0	N		lesion	nonlesion				4	Corpus Horn L	107	0	0
1	Corpus Horn R	88	0	0	Y	DP	4	2				1	Corpus Horn R
2	Corpus Horn R	202	0	0	N	Olig2	1558	1872				2	Corpus Horn R	95	0	0
3	Corpus Horn R	136	0	0	N	Av	0.256739	0.106838				3	Corpus Horn R	273	0	0
4	Corpus Horn R	98	0	0	N	N	11	16				4	Corpus Horn R	119	0	0
1	SVZ L	31	0	0	N							1	SVZ L	65	0	0
2	SVZ L	18	0	0	N							2	SVZ L	53	1	1.88679
3	SVZ L	38	0	0	N							3	SVZ L	43	0	0
4	SVZ L	19	0	0	N							4	SVZ L	71	0	0
1	SVZ R	34	0	0	N							1	SVZ R	53	0	0
2	SVZ R	23	2	8.69565	N							2	SVZ R	83	0	0
3	SVZ R	18	0	0	N							3	SVZ R	130	0	0
4	SVZ R											4	SVZ R	67	0	0
1	Ventral L	75	0	0	Y							1	Ventral L	81	0	0
2	Ventral L	262	0	0	Y							2	Ventral L	242	0	0
3	Ventral L	307	0	0	N							3	Ventral L	190	0	0
4	Ventral L	192	0	0	N							4	Ventral L	223	0	0
1	Ventral R	110	0	0	Y							1	Ventral R	58	0	0
2	Ventral R	194	1	0.515464	Y							2	Ventral R	143	0	0
3	Ventral R	164	0	0	Y							3	Ventral R	133	0	0
4	Ventral R	222	0	0	Y							4	Ventral R	164	0	0
		3430	6	0.174927										3433	1	0.029129
			N	27											N	26
Cd74 ATCUP #5 (score 3, ataxia)												Cd74 AT #5 (score 3.5)
Section	Region	Total Olig2+	Total tdT+Olig2+	%tdT+Olig2+	Lesion?		corpus	CH	SVZ	ventral		Section	Region	Total Olig2+	Total tdT+Olig2+	%tdT+Olig2+		corpus	CH	SVZ	ventral
1	Corpus	41	0	0	N	DP	0	2	0	1		1	Corpus	136	0	0	DP	0	3	1	0
2	Corpus	102	0	0	N	Olig2	326	602	134	327		2	Corpus	262	0	0	Olig2	1059	308	881	1849
3	Corpus	79	0	0	N	Av	0	0.332226	0	0.30581		3	Corpus	444	0	0	Av	0	0.974026	0.113507	0
4	Corpus	104	0	0	N	N	4	8	7	8		4	Corpus	217	0	0	N	4	4	7	8
1	Corpus Horn L	60	1	1.66667	N	Ratio	0	0.666667	0	0.333333		1	Corpus Horn L	98	0	0	Ratio	0	0.75	0.25	0
2	Corpus Horn L	106	1	0.943396	Y							2	Corpus Horn L
3	Corpus Horn L	44	0	0	Y							3	Corpus Horn L
4	Corpus Horn L	119	0	0	N		lesion	nonlesion				4	Corpus Horn L
1	Corpus Horn R	13	0	0	N	DP	1	2				1	Corpus Horn R
2	Corpus Horn R	130	0	0	Y	Olig2	455	934				2	Corpus Horn R	45	0	0
3	Corpus Horn R	59	0	0	N	Av	0.21978	0.214133				3	Corpus Horn R	76	0	0
4	Corpus Horn R	71	0	0	N	N	7	20				4	Corpus Horn R	89	3	3.37079
1	SVZ L	6	0	0	N							1	SVZ L	84	0	0
2	SVZ L	20	0	0	N							2	SVZ L	100	0	0
3	SVZ L	15	0	0	N							3	SVZ L	362	0	0
4	SVZ L	27	0	0	N							4	SVZ L	98	0	0
1	SVZ R	11	0	0	N							1	SVZ R
2	SVZ R	15	0	0	Y							2	SVZ R	62	1	1.6129
3	SVZ R											3	SVZ R	74	0	0
4	SVZ R	40	0	0	N							4	SVZ R	101	0	0
1	Ventral L	18	0	0	N							1	Ventral L	215	0	0
2	Ventral L	57	0	0	Y							2	Ventral L	373	0	0
3	Ventral L	50	0	0	Y							3	Ventral L	265	0	0
4	Ventral L	27	1	3.7037	N							4	Ventral L	196	0	0
1	Ventral R	22	0	0	N							1	Ventral R	139	0	0
2	Ventral R	66	0	0	N							2	Ventral R	153	0	0
3	Ventral R	34	0	0	N							3	Ventral R	247	0	0
4	Ventral R	53	0	0	Y							4	Ventral R	261	0	0
		1389	3	0.215983										4097	4	0.0976324
			N	27											N	23
Cd74 ATCUP #6 (score 3)												Cd74 AT #6 (score 3.5)
Section	Region	Total Olig2+	Total tdT+Olig2+	%tdT+Olig2+	Lesion?		corpus	CH	SVZ	ventral		Section	Region	Total Olig2+	Total tdT+Olig2+	%tdT+Olig2+		corpus	CH	SVZ	ventral
1	Corpus	133	1	0.75188	Y	DP	11	1	0	0		1	Corpus				DP	0	0	1	0
2	Corpus	246	5	2.03252	Y	Olig2	666	514	223	239		2	Corpus	97	0	0	Olig2	462	445	227	965
3	Corpus	287	5	1.74216	N	Av	1.65165	0.194553	0	0		3	Corpus	240	0	0	Av	0	0	0.440529	0
4	Corpus					N	3	6	6	4		4	Corpus	125	0	0	N	3	8	6	8
1	Corpus Horn L	141	0	0	N	Ratio	0.916667	0.0833333	0	0		1	Corpus Horn L	85	0	0	Ratio	0	0	1	0
2	Corpus Horn L	109	1	0.917431	N							2	Corpus Horn L	23	0	0
3	Corpus Horn L	40	0	0	Y							3	Corpus Horn L	26	0	0
4	Corpus Horn L						lesion	nonlesion				4	Corpus Horn L	27	0	0
1	Corpus Horn R	102	0	0	Y	DP	6	6				1	Corpus Horn R	153	0	0
2	Corpus Horn R	71	0	0	Y	Olig2	760	882				2	Corpus Horn R	16	0	0
3	Corpus Horn R	51	0	0	N	Av	0.789474	0.680272				3	Corpus Horn R	79	0	0
4	Corpus Horn R					N	9	10				4	Corpus Horn R	36	0	0
1	SVZ L	51	0	0	N							1	SVZ L	73	0	0
2	SVZ L	48	0	0	N							2	SVZ L	16	0	0
3	SVZ L	28	0	0	Y							3	SVZ L	26	0	0
4	SVZ L											4	SVZ L	39	1	2.5641
1	SVZ R	23	0	0	N							1	SVZ R
2	SVZ R	36	0	0	N							2	SVZ R	44	0	0
3	SVZ R	37	0	0	Y							3	SVZ R	29	0	0
4	SVZ R											4	SVZ R
1	Ventral L	42	0	0	Y							1	Ventral L	89	0	0
2	Ventral L	61	0	0	Y							2	Ventral L	173	0	0
3	Ventral L											3	Ventral L	130	0	0
4	Ventral L											4	Ventral L	126	0	0
1	Ventral R	50	0	0	N							1	Ventral R	151	0	0
2	Ventral R	86	0	0	N							2	Ventral R	80	0	0
3	Ventral R											3	Ventral R	118	0	0
4	Ventral R											4	Ventral R	98	0	0
		1642	12	0.730816										2099	1	0.0476417
			N	19											N	25
Cd74 ATCUP #7 (score 1.5)
Section	Region	Total Olig2+	Total tdT+Olig2+	%tdT+Olig2+	Lesion?		corpus	CH	SVZ	ventral
1	Corpus	123	0	0	N	DP	5	1	0	0
2	Corpus	180	0	0	Y	Olig2	509	359	127	489
3	Corpus	120	5	4.16667	Y	Av	0.982318	0.278552	0	0
4	Corpus	86	0	0	Y	N	4	7	8	8
1	Corpus Horn L	32	0	0	Y	Ratio	0.833333	0.166667	0	0
2	Corpus Horn L	32	0	0	Y
3	Corpus Horn L	22	0	0	N
4	Corpus Horn L	79	0	0	N		lesion	nonlesion
1	Corpus Horn R					DP	5	1
2	Corpus Horn R	72	1	1.38889	N	Olig2	729	708
3	Corpus Horn R	64	0	0	N	Av	0.685871	0.141243
4	Corpus Horn R	58	0	0	Y	N	11	16
1	SVZ L	11	0	0	N
2	SVZ L	20	0	0	N
3	SVZ L	8	0	0	N
4	SVZ L	15	0	0	N
1	SVZ R	39	0	0	N
2	SVZ R	12	0	0	N
3	SVZ R	5	0	0	N
4	SVZ R	17	0	0	N
1	Ventral L	47	0	0	Y
2	Ventral L	65	0	0	Y
3	Ventral L	63	0	0	Y
4	Ventral L	40	0	0	Y
1	Ventral R	53	0	0	Y
2	Ventral R	69	0	0	N
3	Ventral R	85	0	0	N
4	Ventral R	67	0	0	N
		1484	6	0.404313
			N	27
Cd74 ATCUP #8 (score 0.5)
Section	Region	Total Olig2+	Total tdT+Olig2+	%tdT+Olig2+	Lesion?		corpus	CH	SVZ	ventral
1	Corpus	99	1	1.0101	N	DP	4	10	0	2
2	Corpus	223	0	0	N	Olig2	518	1713	329	641
3	Corpus	119	2	1.68067	N	Av	0.772201	0.583771	0	0.312012
4	Corpus	77	1	1.2987	N	N	4	8	7	8
1	Corpus Horn L	186	0	0	Y	Ratio	0.25	0.625	0	0.125
2	Corpus Horn L	244	0	0	N
3	Corpus Horn L	160	3	1.875	N
4	Corpus Horn L	197	0	0	N		lesion	nonlesion
1	Corpus Horn R	300	2	0.666667	N	DP	3	13
2	Corpus Horn R	209	1	0.478469	N	Olig2	849	2352
3	Corpus Horn R	246	1	0.406504	Y	Av	0.353357	0.552721
4	Corpus Horn R	171	3	1.75439	N	N	9	18
1	SVZ L	43	0	0	N
2	SVZ L	30	0	0	N
3	SVZ L	44	0	0	N
4	SVZ L	52	0	0	Y
1	SVZ R	62	0	0	N
2	SVZ R
3	SVZ R	67	0	0	N
4	SVZ R	31	0	0	N
1	Ventral L	65	2	3.07692	Y
2	Ventral L	58	0	0	Y
3	Ventral L	99	0	0	Y
4	Ventral L	226	0	0	N
1	Ventral R	50	0	0	Y
2	Ventral R	48	0	0	Y
3	Ventral R	50	0	0	N
4	Ventral R	45	0	0	Y
		3201	16	0.499844
			N	27
