# Supplementary material for: MHC class I and MHC class II reporter mice enable analysis of immune oligodendroglia in mouse models of multiple sclerosis
Source: eLife. 2023 Apr 14;12:e82938. doi: 10.7554/eLife.82938 (PMC10181822; doi:10.7554/eLife.82938)
Supplement: Figure 9—figure supplement 2—source data 1. [file elife-82938-fig9-figsupp2-data1.xlsx]

## Sheet: Cd74 myeloid tdT+vs tdT-
DE Cd74 myeloid tdT+ compared to tdT-
pct.1- percent positive in tdT+
pct.2- percent positive in tdT-
av_Log2F- enrichment in tdT+ compared to tdT-
	avg_log2FC	pct.1	pct.2
H2-Eb1	4.3039	0.986	0.199
H2-Aa	4.05778	0.992	0.242
H2-Ab1	3.97356	0.991	0.306
Cd74	3.29724	0.995	0.507
Fabp5	3.10187	0.734	0.346
C1qa	3.03534	0.799	0.174
Gpnmb	2.78022	0.68	0.124
C1qc	2.77953	0.807	0.185
C1qb	2.69848	0.872	0.249
Saa3	2.69605	0.737	0.289
Apoe	2.5825	0.999	0.729
Ccl5	2.50003	0.821	0.335
Ctsd	2.26768	0.995	0.857
Arg1	2.22906	0.602	0.124
Ly6i	2.17668	0.898	0.443
TDT	2.09801	0.981	0.38
Ms4a7	1.83843	0.693	0.108
Acp5	1.79981	0.738	0.156
Fth1	1.75264	1	1
Trem2	1.70949	0.887	0.434
Cd9	1.69268	0.82	0.276
Ctss	1.63374	1	0.946
Lgals3bp	1.60647	0.941	0.475
Cd63	1.54902	0.6	0.143
Ctsb	1.48599	0.999	0.957
Cd68	1.30815	0.977	0.805
Cxcl16	1.2916	0.971	0.392
H2-DMb1	1.27185	0.936	0.432
Slc7a2	1.26852	0.608	0.136
Spp1	1.23056	0.295	0.133
Sgk1	1.20598	0.702	0.246
Lgmn	1.19422	0.81	0.482
Mif	1.18803	0.988	0.824
Cfb	1.15776	0.768	0.308
Cd300c2	1.15497	0.953	0.548
Ctsl	1.14572	0.903	0.604
Cstb	1.13354	0.994	0.937
Macroh2a1	-1.00637	0.786	0.953
Gsr	-1.01383	0.709	0.772
Ifi209	-1.01874	0.605	0.824
H2az1	-1.02311	0.984	0.998
Lmnb1	-1.05778	0.125	0.471
Actb	-1.09658	1	1
Ifi27l2a	-1.10295	0.821	0.826
Ifitm2	-1.14249	0.877	0.977
Thbs1	-1.15131	0.235	0.33
S100a10	-1.15399	0.9	0.934
Anxa2	-1.16135	0.799	0.943
Anxa1	-1.16518	0.595	0.733
Lsp1	-1.16594	0.554	0.905
Dmkn	-1.18161	0.005	0.315
Actg1	-1.18446	0.994	0.998
Cytip	-1.19871	0.173	0.67
Slpi	-1.21057	0.358	0.67
Ccl2	-1.23647	0.117	0.285
Ifitm3	-1.26078	0.974	0.984
Ms4a4c	-1.31642	0.63	0.878
Ccr2	-1.33726	0.41	0.887
Isg15	-1.35515	0.485	0.692
Serpinb1a	-1.37961	0.006	0.276
S100a6	-1.39145	0.862	0.955
Wfdc21	-1.41798	0.236	0.414
Srgn	-1.48226	0.882	0.973
Ngp	-1.48229	0.005	0.253
Coro1a	-1.51193	0.874	0.989
Stmn1	-1.62938	0.076	0.321
Hmgb2	-1.65123	0.828	0.876
Ndufa4	-1.65256	0.432	0.934
S100a4	-1.69523	0.481	0.916
Ifitm1	-1.74465	0.164	0.572
Sell	-1.77394	0.223	0.848
Ifitm6	-1.92153	0.11	0.692
Camp	-1.94679	0.019	0.28
H2ac24	-2.22846	0.183	0.346
Vcan	-2.302	0.075	0.679
Cxcl10	-2.3729	0.191	0.367
Plac8	-2.49139	0.548	0.991
Lcn2	-2.91133	0.12	0.661
Prtn3	-3.52865	0.195	0.565
S100a8	-3.916	0.676	0.817
