# Supplementary material for: MHC class I and MHC class II reporter mice enable analysis of immune oligodendroglia in mouse models of multiple sclerosis
Source: eLife. 2023 Apr 14;12:e82938. doi: 10.7554/eLife.82938 (PMC10181822; doi:10.7554/eLife.82938)
Supplement: Figure 9—source data 1. [file elife-82938-fig9-data1.xlsx]

## Sheet: Sheet1
	Pre-Filter										Post-Filter
	Count	nUMI Q1	nUMI Median	nUMI Q3	nGene Q1	nGene Median	nGene Q3	mito Q1	mito Median	mito Q3	Count	nUMI Q1	nUMI Median	nUMI Q3	nGene Q1	nGene Median	nGene Q3	mito Q1	mito Median	mito Q3
Cd74tdT tdT-positive sorted	8307	2122	2839	3478	6522	11400	16865	2.356	3.149	4.196	7968	6990	11848	17132	2210	2895	3508	2.333	3.105	4.061
Cd74tdT tdT-negative sorted	12091	1736	2241	2878	3828	7014	11048	2.343	3.115	4.228	11197	4292	7467	11505	1843	2307	2940	2.299	3.025	3.925
B2mtdT tdT-positive sorted	10259	1812	2626	3465	4030	8416	14703	2.795	3.707	5.15	8903	5374	9868	15701	2107	2826	3580	2.688	3.514	4.547
