# Supplementary material for: MHC class I and MHC class II reporter mice enable analysis of immune oligodendroglia in mouse models of multiple sclerosis
Source: eLife. 2023 Apr 14;12:e82938. doi: 10.7554/eLife.82938 (PMC10181822; doi:10.7554/eLife.82938)
Supplement: Figure 10—figure supplement 1—source data 1. [file elife-82938-fig10-figsupp1-data1.xlsx]

## Sheet: contaminating myeloid vs OL
DE of myeloid oligodendroglial cluster vs other oligodendroglial clusters
pct.1- percent positive in myeloid oligodendroglia cluster
pct.2- percent positive in other oligodendroglia
av_Log2F- enrichment in myeloid oligodendroglial cluster compared to other oligodendroglia
	avg_log2FC	pct.1	pct.2
Chil3	565.534	1	0.284
Wfdc21	211.626	0.52	0.059
Plac8	208.823	0.76	0.131
Anxa1	140.837	0.64	0.062
Ifitm6	106.251	0.6	0.078
Cybb	99.1795	0.6	0.021
Ifitm3	87.6369	0.92	0.312
Tyrobp	83.3088	1	0.098
Ly6c2	80.4221	0.6	0.143
Ctss	79.7976	0.64	0.094
Wfdc17	78.9145	0.44	0.044
Fcer1g	71.6937	0.84	0.101
Hp	68.7577	0.68	0.075
Lgals3	65.7514	0.84	0.128
F13a1	61.7084	0.44	0.005
Ctsc	59.5284	0.56	0.043
Ms4a6c	58.786	0.4	0.019
Cyba	48.6822	0.8	0.211
Vcan	48.5827	0.28	0.024
Ly6e	45.7986	0.84	0.28
Alox5ap	40.4401	0.8	0.04
Cd177	38.6028	0.28	0.014
Ncf1	38.5922	0.56	0.013
Ms4a4c	35.6856	0.28	0.024
Ccr2	32.9654	0.56	0.048
Ifitm2	32.7386	0.8	0.161
Gpx1	30.7386	0.88	0.412
Mmp8	28.5241	0.52	0.006
Ifi30	27.9448	0.48	0.078
Mmp9	26.8659	0.28	0.01
Mpeg1	26.8582	0.4	0.018
Slfn5	25.5905	0.36	0.045
Slfn2	25.4442	0.8	0.11
Ly86	24.1984	0.32	0.005
S100a11	24.1596	0.8	0.233
Ifi209	23.3032	0.36	0.033
Lst1	23.0774	0.56	0.032
Smpdl3a	22.9152	0.48	0.084
Ifi204	22.7807	0.52	0.003
Mgst1	22.5112	0.68	0.027
Tgfbi	21.1009	0.52	0.062
Mcemp1	20.0243	0.6	0.008
Gpr141	19.8513	0.48	0.008
Napsa	19.8128	0.68	0.02
Cxcr2	19.3377	0.36	0.007
Spi1	18.4165	0.56	0.021
Tnfaip2	18.4138	0.4	0.01
Igsf6	18.4087	0.48	0.01
Vim	18.3875	0.8	0.268
Gm21188	17.4551	0.44	0.007
Klra2	17.4415	0.4	0.003
Lyn	17.3883	0.52	0.021
Ms4a6d	16.9256	0.28	0.026
Slfn1	16.5672	0.48	0.044
Ctsh	15.7986	0.6	0.088
Ifi207	15.7324	0.4	0.002
Pygl	15.6155	0.48	0.005
Plbd1	15.5701	0.48	0.006
Ccl9	15.5206	0.4	0.014
H2-DMa	15.2882	0.32	0.054
Slpi	15.0921	0.48	0.032
Sell	15.0485	0.4	0.018
Ifi211	13.7428	0.32	0.006
Clec4a2	12.7533	0.44	0.006
Gda	12.7142	0.56	0.008
Fcgr3	12.6917	0.6	0.018
Clec4a1	12.6647	0.28	0.002
AA467197	12.6304	0.52	0.078
Fn1	12.6155	0.64	0.088
Sp140	12.5994	0.4	0.028
Fam111a	12.5447	0.52	0.029
Tnfaip8	12.2901	0.44	0.06
Arhgdib	11.627	0.72	0.199
Tnfaip8l2	11.4906	0.32	0.037
C3	11.2277	0.44	0.015
Ccr1	11.127	0.48	0.011
Itgam	10.8936	0.6	0.009
Csf1r	9.97377	0.36	0.009
Fcgr4	9.75981	0.36	0.009
Cd300c2	9.75844	0.4	0.011
Ltb4r1	9.73189	0.32	0.037
Cd68	9.63302	0.32	0.031
Ncf4	9.3612	0.44	0.044
Emb	9.27057	0.64	0.077
Clec12a	9.11602	0.36	0.015
Ncf2	8.62874	0.52	0.038
Pld4	8.59482	0.44	0.006
Pirb	8.55789	0.52	0.016
Cd44	8.47473	0.4	0.087
Nfam1	8.447	0.4	0.009
Fcgr2b	8.44351	0.32	0.011
Csf2rb	8.37242	0.4	0.009
Rbms1	8.32365	0.56	0.159
Nhsl2	8.29789	0.28	0.02
Sirpa	8.24739	0.4	0.032
Vasp	8.13323	0.52	0.137
Cd53	8.01688	0.76	0.072
Vsir	7.50663	0.48	0.051
Sp100	7.49159	0.56	0.088
Clec4e	7.33352	0.32	0.009
Ifngr2	6.99704	0.44	0.071
Fcgr1	6.99635	0.32	0.005
Fgl2	6.6254	0.36	0.044
Lyst	6.53511	0.6	0.167
Ms4a6b	6.52466	0.44	0.098
Pla2g7	5.59151	0.4	0.015
Rab32	5.57308	0.44	0.023
Clec4a3	5.57083	0.28	0.002
Glrx	5.5059	0.4	0.088
Glipr2	5.47958	0.4	0.062
Prkcd	5.42606	0.44	0.023
Ptpn6	5.22418	0.44	0.041
Hck	5.19394	0.44	0.012
Unc119	5.18348	0.4	0.076
Cd33	5.17263	0.4	0.013
Csf2ra	5.01055	0.52	0.095
Snx20	4.96293	0.48	0.041
Baz1a	4.92689	0.44	0.08
Gch1	4.91314	0.28	0.037
Cd24a	4.90282	0.36	0.016
Cited2	4.88282	0.52	0.122
Gpsm3	4.80207	0.44	0.07
Cfp	4.66529	0.4	0.014
Plp2	4.59709	0.32	0.056
Hacd4	4.59516	0.28	0.006
Plaur	4.53113	0.48	0.038
Ccl6	4.44511	0.52	0.018
Fes	4.32874	0.44	0.015
Rgs2	4.31062	0.44	0.031
AB124611	4.3103	0.36	0.021
Il10ra	4.25243	0.32	0.012
Hk2	4.17975	0.36	0.038
Mcub	4.07662	0.28	0.033
Plek	4.05728	0.36	0.027
Tm6sf1	4.055	0.44	0.06
Cyp4f18	3.97563	0.4	0.009
Oas3	3.97268	0.28	0.009
Jaml	3.85622	0.28	0.023
Slfn4	3.82495	0.4	0.009
Cd300lf	3.69124	0.48	0.026
Xdh	3.56226	0.6	0.043
Ikzf1	3.519	0.44	0.044
Notch2	3.47338	0.36	0.054
Sirpb1c	3.46132	0.4	0.001
Pilra	3.45665	0.4	0.003
Agpat2	3.34295	0.32	0.019
Pik3cd	3.22258	0.28	0.033
Myo1f	3.15865	0.36	0.022
Themis2	3.09596	0.28	0.001
Nrros	3.01647	0.28	0.018
Rgs19	2.92051	0.4	0.036
Eif4ebp1	2.84646	0.36	0.043
Il13ra1	2.77387	0.4	0.006
Was	2.66633	0.36	0.031
Cers6	2.64315	0.28	0.012
Lrp1	2.64281	0.32	0.024
Sp110	2.58928	0.4	0.051
Crlf2	2.53121	0.48	0.1
Rab27a	2.47755	0.28	0.027
Tmem154	2.44918	0.28	0.022
Fgr	2.42648	0.52	0.004
Lilr4b	2.35979	0.36	0.01
Bst1	2.32406	0.44	0.007
Irf5	2.30514	0.28	0.02
Csf3r	2.20518	0.52	0.011
Milr1	2.18516	0.32	0.016
Pik3ap1	2.17965	0.4	0.009
Msr1	2.14518	0.28	0.002
Sla	2.12439	0.44	0.052
Sema4a	2.12092	0.4	0.032
B4galt1	2.09216	0.32	0.041
Bin2	2.0605	0.36	0.058
Otulinl	2.02749	0.36	0.034
Hk3	2.02601	0.28	0.008

## Sheet: contaminating T cell vs OL
DE of T cell oligodendroglia cluster vs other oligodendroglial clusters
pct.1- percent positive in T cell oligodendroglia cluster
pct.2- percent positive in other oligodendroglia
av_Log2F- enrichment in T cell oligodendroglia cluster compared to other oligodendroglia
	avg_log2FC	pct.1	pct.2
Ccl5	336.286	0.782	0.291
Tpt1	299.977	1	0.999
Rps15a	249.482	1	0.985
Rps2	220.629	1	0.98
Rps24	216.3	1	0.992
Rpsa	209.087	1	0.989
Rpl19	184.561	1	0.994
Rps11	175.904	1	0.981
Rpl12	163.345	1	0.93
Eef1a1	162.921	1	0.997
Rps13	162.921	1	0.982
Tnfrsf4	162.921	0.345	0.018
Lgals1	162.921	0.982	0.185
Rpl17	162.92	1	0.982
Rps7	161.478	1	0.985
Rplp1	158.523	1	0.991
Rpl23	147.051	1	0.994
Rpl34	142.723	1	0.984
Rpl18a	138.395	1	0.988
Fau	135.51	1	0.996
Ptma	131.181	1	0.997
Hspa8	129.739	1	0.987
Rps27	126.853	1	0.984
Rpl13	123.968	1	0.994
Rpl9	122.525	1	0.987
Rpl38	121.082	1	0.985
Rps20	119.64	1	0.983
Rpl32	118.197	1	0.991
Rpl18	116.755	1	0.989
Rpl30	116.754	1	0.991
Rps12	116.754	1	0.982
Rps3a1	115.312	1	0.989
Pfn1	113.869	1	0.913
Tmsb10	111.436	1	0.615
S100a10	108.141	0.982	0.275
Rps16	108.099	1	0.988
Rps21	106.655	1	0.988
Rpl37a	105.213	1	0.981
Rpl24	105.213	1	0.991
Actg1	104.77	1	0.911
Rpl41	103.84	1	0.994
Rpl27	99.432	1	0.98
Rpl11	96.5567	1	0.992
Rpl36	95.114	1	0.969
Rps23	95.1129	1	0.986
Rplp0	93.6727	1	0.98
Ppia	93.6714	1	0.997
Rps5	93.6708	1	0.982
Rpl29	93.6612	1	0.95
H2-K1	93.5568	0.982	0.88
H2az1	92.2287	1	0.888
Rps18	90.7873	1	0.98
Rpl7	90.7855	1	0.985
Rpl15	90.761	1	0.982
Hmgb2	89.3433	0.891	0.248
Cd52	89.3433	0.964	0.33
Rps14	88.8913	1	0.989
Srgn	87.9006	0.982	0.169
Rpl27a	86.4579	1	0.989
Rps3	86.4579	1	0.985
Rpl39	82.1298	1	0.981
Rpl37	82.1297	1	0.988
Naca	80.6133	1	0.964
Cd3d	80.3412	0.982	0.094
Ldha	79.9476	0.891	0.244
Rps8	79.2445	1	0.995
Tubb5	77.5861	0.873	0.621
Gzmb	76.3554	0.327	0.018
Nkg7	74.7008	0.818	0.096
Rplp2	73.4736	1	0.973
Tnfrsf18	70.4569	0.655	0.016
Crip1	69.1455	0.982	0.245
Cd3g	68.964	0.927	0.085
Rpl21	66.2602	1	0.986
Rpl8	64.8876	1	0.986
Rpl3	64.8875	1	0.979
Rpl35a	64.8419	1	0.982
Ptprcap	64.2527	0.909	0.064
Rps26	63.3734	1	0.977
Ms4a4b	62.4693	0.782	0.05
Capg	61.7476	0.8	0.089
Rps4x	59.0516	1	0.98
Oaz1	59.0466	0.982	0.963
Rps19	57.6111	1	0.967
Rpl22	57.5943	1	0.952
Rpl28	54.7186	1	0.985
S100a4	54.7185	0.909	0.161
Coro1a	53.7181	1	0.155
Rack1	53.2985	1	0.945
Ubb	53.2757	1	0.997
Rpl6	51.8332	1	0.992
Rpl35	50.8424	1	0.922
Myl6	50.3999	0.982	0.961
Rpl7a	50.3891	1	0.967
Bcl2a1b	50.2133	0.764	0.022
Clic1	49.5349	0.982	0.193
Fxyd5	47.4736	0.945	0.194
Hcst	46.6349	0.964	0.059
Ncl	45.4382	0.982	0.911
Cxcr6	44.6277	0.818	0.03
Eef1b2	44.6197	1	0.928
Rps6	44.6197	1	0.971
Cd2	44.5687	0.836	0.029
Hsp90ab1	43.177	1	0.995
Ltb	42.5404	0.945	0.071
Uba52	41.7341	1	0.838
Rpl26	40.3617	1	0.981
Id2	39.9858	0.873	0.081
Cox5a	39.9328	0.964	0.892
Rac2	39.2312	0.982	0.116
Rpl5	38.8494	1	0.958
Rps17	38.8208	0.982	0.97
Shisa5	37.1419	0.982	0.379
Cd8b1	35.9799	0.309	0.032
Ptpn18	35.9534	0.945	0.105
Rps15	34.5207	1	0.974
Atp5e	34.5207	1	0.934
Gimap4	34.2757	0.927	0.044
Pkp3	33.0697	0.636	0.04
Cox8a	33.0499	0.982	0.982
H2-Q7	32.9512	0.964	0.444
Tle5	32.8905	0.982	0.858
Myl12a	32.0023	0.927	0.587
Sh3bgrl3	31.6095	1	0.902
Lsp1	31.1315	0.964	0.1
Bcl2a1d	30.2654	0.545	0.01
Rpl10	30.1928	0.982	0.969
Calm1	30.1729	1	0.982
Arf5	30.1124	0.964	0.776
Arl6ip1	29.1786	1	0.929
Snrpg	29.0155	0.945	0.755
Il7r	28.9688	0.745	0.018
Selenoh	28.931	0.691	0.33
Rps10	28.7501	1	0.897
Cmtm7	28.6696	0.8	0.046
Arpc2	28.5434	1	0.715
Selplg	28.0715	0.945	0.052
Jpt1	27.9887	0.818	0.189
Abracl	27.7824	0.927	0.083
Rpl31	27.736	0.964	0.91
Sumo2	27.6929	0.982	0.897
Snrpe	27.6864	0.945	0.698
Polr1d	27.4713	0.982	0.733
Lat	27.3198	0.855	0.052
Cd47	27.2327	0.982	0.898
Ubl5	27.0957	1	0.909
Rpl10a	26.8647	1	0.899
Ctsw	26.8406	0.836	0.046
Hmgb1	26.3864	0.982	0.965
Anp32b	26.0505	0.964	0.756
Eef1g	25.8613	0.964	0.775
Eef2	25.8594	1	0.909
Cd3e	25.7799	0.909	0.045
Ets1	25.7785	0.909	0.052
Ppib	25.597	1	0.915
Rilpl2	25.2281	0.527	0.194
Nap1l1	25.1821	0.945	0.675
Ddx5	24.9334	0.982	0.966
Krtcap2	24.723	0.945	0.851
Cd8a	24.4726	0.309	0.018
Lck	24.43	0.891	0.037
Rpl23a	24.4184	1	0.928
Cotl1	24.2377	0.927	0.154
Ran	23.9733	0.909	0.804
Dut	23.9325	0.618	0.177
Rpl13a	23.897	0.982	0.616
Tagln2	23.128	0.909	0.184
Atp5l	23.0586	0.982	0.949
Cd5	23.0197	0.582	0.013
Arpc4	22.9514	0.818	0.486
Eif5a	22.7721	0.964	0.853
Pgk1	22.6468	0.927	0.722
Ppp1ca	22.5328	0.927	0.758
Serbp1	22.5177	0.964	0.879
Gimap1	22.5016	0.891	0.045
Sfpq	22.4253	0.927	0.76
Sdf4	22.077	0.964	0.696
Odc1	22.0088	0.618	0.248
Rpl22l1	21.728	0.982	0.812
Actr3	21.5366	0.982	0.626
Uqcrh	21.5315	0.982	0.946
Eif3f	21.526	0.982	0.83
Pfdn5	21.3863	0.982	0.938
Itgb1	21.3745	0.855	0.594
Rgs10	21.3349	0.836	0.056
Cox6c	21.1954	1	0.978
Nme1	21.1531	0.891	0.775
Pabpc1	21.0909	0.982	0.666
Chchd2	21.0693	0.982	0.984
Capzb	20.7992	0.964	0.626
Edf1	20.7822	0.982	0.885
Eef1d	20.6785	0.982	0.859
Dnajc15	20.5666	0.909	0.502
Batf	20.2405	0.436	0.007
Lcp1	20.2091	0.964	0.125
Cenpa	20.094	0.273	0.033
Cox6b1	20.0892	0.964	0.935
Dnaja1	19.968	0.927	0.879
Ptprc	19.7758	0.982	0.067
Srsf7	19.7586	0.891	0.705
Stk17b	19.548	0.855	0.084
Rpl14	19.2863	1	0.979
Septin1	19.0571	0.873	0.242
Ifngr1	18.9248	0.927	0.268
Sh2d2a	18.7306	0.709	0.01
Eif3h	18.7087	0.964	0.751
Rpl36a	18.6548	1	0.911
Rps29	18.6516	1	0.994
Rps25	18.6513	1	0.967
Cks2	18.6467	0.4	0.046
Ube2b	18.606	0.964	0.772
Epsti1	18.4838	0.873	0.036
H2az2	18.4834	0.891	0.653
Macroh2a1	18.4304	0.927	0.527
Lmnb1	18.3353	0.436	0.115
Cd48	18.3263	0.836	0.045
Ssb	18.3145	0.964	0.767
Npm1	18.2487	0.982	0.883
Ybx1	18.188	1	0.924
Cytip	18.1781	0.8	0.029
Rbm39	18.0559	0.964	0.928
Gimap6	18.0548	0.782	0.058
Slc25a5	17.7271	0.927	0.762
Smc4	17.605	0.673	0.212
Rpl4	17.2346	1	0.938
Eif3k	17.2178	0.982	0.824
Ikzf2	17.1493	0.709	0.415
Hspe1	16.9525	0.927	0.851
Klrd1	16.8773	0.4	0.014
Mbnl1	16.7386	0.982	0.655
Cnn2	16.6723	0.836	0.047
Tpi1	16.5175	0.855	0.518
Dek	16.4463	0.927	0.751
Thy1	16.2793	0.909	0.056
Jak1	16.2692	0.927	0.404
Tma7	16.1791	0.982	0.828
Ramp1	16.1279	0.491	0.046
D8Ertd738e	16.0715	0.964	0.902
Cox5b	15.925	0.982	0.944
Maf	15.7933	0.382	0.019
Sub1	15.7772	1	0.74
Calr	15.7658	0.982	0.858
Ndfip1	15.7621	1	0.912
Hnrnpa2b1	15.7336	1	0.905
Itga4	15.6316	0.636	0.062
Atp5a1	15.5829	0.982	0.888
Leprotl1	15.5379	0.945	0.576
Myh9	15.4516	0.945	0.254
Itgb7	15.3797	0.818	0.034
Taf10	15.3279	0.964	0.685
Laptm5	15.1877	0.982	0.081
Atp5g2	15.1873	0.982	0.942
Lsm4	15.03	0.909	0.687
Npm3	14.9369	0.691	0.195
Atp5h	14.9029	0.982	0.968
Ostc	14.747	0.909	0.673
Cdk2ap2	14.7305	0.891	0.474
Birc6	14.7187	0.909	0.591
Hnrnpa3	14.3961	0.964	0.835
Il2rb	14.3558	0.782	0.021
Rps27a	14.3493	1	0.996
Cct4	14.3415	0.909	0.649
Rbm3	14.3363	0.982	0.708
Cdc42	14.3211	1	0.922
Set	14.3167	0.982	0.858
Rpl36al	14.3128	0.982	0.722
Psma2	14.3026	0.964	0.882
Snrpb	14.2928	0.927	0.839
Hnrnpk	14.1101	0.982	0.902
Msn	14.0624	0.964	0.357
Cct8	14.043	0.927	0.732
Ndufa13	13.9603	0.964	0.944
Rbpj	13.9063	0.709	0.384
Smc2	13.8599	0.364	0.121
Gnas	13.8344	1	0.915
Anp32a	13.7088	0.945	0.691
Snrpf	13.6763	0.945	0.709
Cox4i1	13.614	0.982	0.983
Atp5g3	13.4883	0.945	0.768
Snrpd2	13.3635	0.927	0.787
Skap1	13.3008	0.891	0.024
Gimap3	13.2605	0.836	0.021
Psme2	13.0518	0.909	0.602
Hnrnpd	12.9626	0.891	0.652
Sh2d1a	12.9438	0.6	0.015
Gimap9	12.9014	0.636	0.02
Emp3	12.8824	0.8	0.109
Dock2	12.8595	0.891	0.026
Rap1b	12.8538	0.909	0.502
Psmd8	12.818	0.909	0.724
Ntan1	12.65	0.873	0.612
Snrpd1	12.6443	0.891	0.659
Tomm5	12.5676	0.891	0.559
Limd2	12.519	0.855	0.068
Dad1	12.4119	0.964	0.93
Gm2a	12.369	0.782	0.412
Icos	12.3463	0.618	0.013
Cox7b	12.3398	0.982	0.854
Emg1	12.3375	0.945	0.488
Krt83	12.1138	0.364	0.013
Atp5j2	12.0697	0.964	0.927
Gmfg	11.8683	0.964	0.08
Fbxw2	11.8555	0.655	0.34
Mrps16	11.7317	0.891	0.525
Atp5c1	11.675	0.945	0.852
Rps28	11.6208	1	0.968
Ucp2	11.6195	0.873	0.102
Isg20	11.4607	0.618	0.031
Atp5d	11.4493	0.982	0.913
Bcl2	11.4376	0.364	0.03
Tbca	11.4177	0.836	0.543
Stx11	11.4135	0.255	0.013
Ndufv3	11.3454	0.873	0.697
Psma1	11.319	0.873	0.609
Ass1	11.2626	0.382	0.02
B4galnt1	11.2111	0.673	0.114
Itgb2	11.1863	0.836	0.054
Psmb3	11.1363	0.982	0.855
Atp5pb	11.0892	0.982	0.952
Hnrnpf	11.0306	1	0.866
Tpr	11.011	0.945	0.821
Phb2	11.0091	0.727	0.484
Nfkb1	10.9964	0.6	0.13
Btg1	10.9937	0.927	0.261
Cox7a2l	10.8849	1	0.81
Exosc8	10.7662	0.691	0.275
Samsn1	10.7588	0.327	0.018
Fkbp3	10.6999	0.945	0.731
Prr13	10.6292	0.855	0.497
Itgal	10.5446	0.818	0.033
Rnaseh2c	10.5241	0.873	0.625
Mettl23	10.4635	0.891	0.554
Rora	10.4466	0.745	0.241
Sec11a	10.3588	0.855	0.503
Cd27	10.237	0.382	0.017
Cd226	10.1244	0.582	0.008
Il18r1	10.1193	0.818	0.024
Cd6	10.1189	0.382	0.005
Mrps24	10.1014	0.927	0.709
Ifng	10.047	0.364	0.018
Eif1	9.99464	1	0.996
Ywhah	9.95334	0.8	0.536
Nsa2	9.93728	0.945	0.691
Tmem176a	9.91683	0.345	0.063
Ndufb7	9.8808	0.982	0.909
Gimap7	9.8548	0.691	0.018
Arl6ip5	9.84747	0.909	0.619
Pycard	9.83954	0.836	0.096
Mrpl52	9.807	0.836	0.582
Stk24	9.7382	0.727	0.15
Cct2	9.64656	0.945	0.812
Hif1a	9.59591	0.8	0.461
Bptf	9.58775	0.909	0.666
Atp5b	9.48588	1	0.935
Arhgef1	9.45475	0.727	0.221
Eno1	9.43062	0.927	0.409
Timm23	9.41721	0.818	0.661
Arhgap30	9.35527	0.636	0.032
Pdia3	9.31652	0.964	0.845
G3bp1	9.2865	0.836	0.528
Atp5o.1	9.23838	0.964	0.87
Gnb2	9.19162	0.964	0.87
Tbc1d10c	9.10725	0.782	0.027
Ube2i	9.07002	0.964	0.624
Lsm5	9.05334	0.836	0.589
Hnrnpa0	9.03732	0.964	0.78
Dusp2	9.01804	0.709	0.026
Fundc2	8.85926	0.836	0.461
Myl12b	8.85916	0.818	0.378
Klrk1	8.84984	0.309	0.008
Cd247	8.84944	0.655	0.018
Erh	8.83423	0.891	0.61
Cd160	8.70589	0.309	0.011
Actn2	8.65548	0.273	0.007
Cyth4	8.65355	0.782	0.031
Capza1	8.61876	0.891	0.399
Arhgap45	8.61176	0.8	0.027
Txnip	8.57676	0.836	0.298
Dap	8.57533	0.564	0.105
Rnf213	8.5503	0.545	0.223
Gng2	8.49431	0.727	0.05
Pkm	8.47722	0.964	0.717
Traf1	8.46003	0.473	0.01
Mbd2	8.45006	0.945	0.566
Atp5mpl	8.44087	0.927	0.822
Lrrfip1	8.39908	0.836	0.056
Phf11b	8.37901	0.545	0.015
Il2rg	8.3541	0.818	0.046
Runx3	8.34352	0.764	0.016
Hcls1	8.30885	0.727	0.035
Hnrnpc	8.30025	0.964	0.806
Sugt1	8.2679	0.873	0.654
Cdc37	8.25591	0.945	0.686
Fyb	8.23523	0.927	0.07
Brk1	8.21663	0.964	0.825
Cct5	8.19729	0.945	0.775
Cap1	8.19443	0.855	0.41
Ndufb11	8.18046	0.964	0.929
Ptpn22	8.15167	0.855	0.02
Nol7	8.04934	0.964	0.776
Hpf1	8.00168	0.782	0.476
Rwdd1	7.92058	0.927	0.719
Nop53	7.85784	0.855	0.564
Cntrl	7.82798	0.509	0.217
Cnbp	7.80265	0.982	0.869
Thrap3	7.73775	0.818	0.626
Gzmk	7.69835	0.273	0.008
Ccdc12	7.69423	0.891	0.641
Nedd8	7.67806	0.964	0.887
Cd69	7.65151	0.345	0.006
Gimap5	7.61448	0.618	0.034
Eif3e	7.54634	0.945	0.668
Nucb1	7.50442	0.764	0.285
Kmt2a	7.47897	0.764	0.514
Cd37	7.4251	0.8	0.033
Cd28	7.38179	0.618	0.007
Prelid1	7.34546	0.909	0.502
Klrc1	7.32108	0.309	0.004
Sec61b	7.29603	0.945	0.673
Sla	7.18777	0.691	0.027
Bola2	7.18529	0.891	0.712
Slc25a3	7.17465	0.982	0.805
Ncor1	7.17214	0.964	0.728
Cd82	7.14892	0.909	0.674
Zfp36l2	7.1468	0.873	0.239
Cd4	7.12993	0.418	0.01
Clta	7.11638	0.964	0.884
Slc1a5	7.10707	0.327	0.041
Ssr4	7.08678	0.964	0.852
Sms	7.06718	0.636	0.07
Mrps14	7.04436	0.836	0.63
Dnajb6	7.04063	0.909	0.804
Parp14	7.03436	0.545	0.201
Smco4	7.01338	0.455	0.051
Gpr183	6.99268	0.364	0.011
Ube2l3	6.98829	0.945	0.785
Spcs2	6.95287	1	0.911
Septin9	6.94561	0.745	0.086
Tomm20	6.94477	1	0.873
Tut4	6.93399	0.709	0.338
Bag1	6.91682	0.873	0.424
Ndufa12	6.86742	0.909	0.768
Adgre5	6.85083	0.745	0.056
Prex1	6.83271	0.764	0.349
Cst7	6.80091	0.455	0.01
Atp2b1	6.7575	0.909	0.593
Ythdc1	6.71631	0.836	0.613
Phf20l1	6.71366	0.764	0.451
Xrn2	6.65485	0.818	0.452
Stat1	6.65377	0.964	0.612
Ptpn7	6.64513	0.6	0.016
Crlf2	6.63656	0.691	0.078
Ssrp1	6.57767	0.818	0.403
Lman2	6.57682	0.745	0.356
Lcp2	6.55009	0.618	0.021
Ndufa1	6.54284	0.909	0.65
Celf2	6.53128	0.909	0.062
Ankrd11	6.48666	0.945	0.697
Supt4a	6.41709	0.964	0.761
Arhgap9	6.37782	0.564	0.018
Serpinb6b	6.33846	0.4	0.023
Zup1	6.3293	0.509	0.218
Bin2	6.27684	0.709	0.03
Tspan32	6.26055	0.309	0.018
Ezr	6.19025	0.782	0.042
Nop10	6.18336	0.782	0.556
Atp6v1f	6.18167	0.982	0.876
Tln1	6.14755	0.891	0.7
Micos10	6.127	0.909	0.828
Arpc3	6.10582	0.982	0.749
Gng5	6.10277	0.964	0.841
Sp110	6.09317	0.727	0.023
Ppp1r18	6.07802	0.727	0.049
Alyref	6.01615	0.782	0.592
Tab2	5.97232	0.818	0.522
Rab8a	5.97035	0.764	0.375
Mdh2	5.93328	0.891	0.777
Pgls	5.93297	0.855	0.465
Fmnl1	5.86299	0.618	0.019
Pcbp2	5.84407	0.982	0.866
Mdfic	5.83589	0.418	0.012
Sod1	5.81479	0.891	0.6
Eif3i	5.78759	0.945	0.703
Rinl	5.77801	0.8	0.061
Arpp19	5.7538	0.927	0.807
Srsf3	5.7463	0.945	0.827
Tram1	5.73107	0.782	0.352
Yeats4	5.72784	0.673	0.288
Prrc2c	5.71503	0.982	0.828
Sh3kbp1	5.71206	0.927	0.505
Stap1	5.70241	0.455	0.018
Anxa6	5.67789	0.873	0.044
Rbm42	5.67705	0.855	0.625
Arpc5	5.67252	0.964	0.807
Atp6v0e	5.66771	0.945	0.815
Srrm2	5.66451	0.982	0.917
Grb2	5.65578	0.891	0.652
Gapdh	5.65157	1	0.967
Lsm14a	5.63788	0.709	0.404
Dazap2	5.62881	0.982	0.732
Crlf3	5.61438	0.727	0.187
Ppp1r12a	5.61024	0.982	0.599
Apobec3	5.59733	0.818	0.057
Pstpip1	5.59337	0.527	0.017
Tmem160	5.57344	0.909	0.58
Pdia6	5.56246	0.909	0.709
Aprt	5.56197	0.836	0.359
Ptbp3	5.51015	0.818	0.37
Ankrd44	5.49649	0.673	0.121
Ddost	5.49574	0.836	0.591
Pfkp	5.40324	0.655	0.069
Resf1	5.39964	0.727	0.345
Eif3m	5.39604	0.982	0.718
Tax1bp1	5.39603	0.945	0.752
Rapgef6	5.37637	0.891	0.283
Bcl11b	5.37475	0.8	0.014
Mapre1	5.35551	0.764	0.53
Exosc3	5.31943	0.545	0.213
Hnrnpm	5.30991	0.873	0.593
Sf3b1	5.3059	0.964	0.76
Tpst2	5.29821	0.655	0.17
Nin	5.2827	0.327	0.09
Zap70	5.2694	0.673	0.02
Adss	5.24078	0.545	0.214
Spn	5.22912	0.727	0.014
Snrpd3	5.21511	0.909	0.728
Trir	5.20253	0.818	0.706
Grk2	5.19774	0.709	0.248
Ptp4a2	5.19069	0.945	0.75
Atp11b	5.18351	0.673	0.353
Nt5c	5.11077	0.764	0.459
Mrpl54	5.10745	0.8	0.54
Tap2	5.09263	0.873	0.446
Rbx1	5.08641	0.964	0.939
Csnk2b	5.08135	0.909	0.707
Rnf138	5.04848	0.636	0.308
Tmem134	5.03069	0.927	0.698
Fgfr1op2	5.01969	0.836	0.628
Prkca	4.95623	0.727	0.405
Med10	4.94187	0.782	0.412
Rock1	4.93688	0.964	0.765
Trat1	4.90582	0.273	0.006
Rheb	4.90404	0.927	0.65
Hsd11b1	4.88835	0.491	0.019
Wipf1	4.88591	0.727	0.352
Apbb1ip	4.84802	0.673	0.082
Slc9a3r1	4.82106	0.782	0.254
Ugcg	4.80817	0.509	0.125
Rgs1	4.80802	0.436	0.012
Ddx6	4.79346	0.891	0.661
Stat4	4.77909	0.491	0.004
H2-Q6	4.74508	0.636	0.054
Akap13	4.72237	0.836	0.074
Scaf11	4.72119	0.945	0.811
Traf3ip3	4.71149	0.582	0.013
Sf3b6	4.70953	0.927	0.756
Cxcr3	4.70791	0.6	0.014
Dock8	4.6994	0.4	0.018
Rhoh	4.64134	0.6	0.006
Arl4c	4.63795	0.509	0.022
Nup210	4.61087	0.436	0.029
Cbx3	4.60712	0.927	0.812
Csk	4.60614	0.709	0.153
Tmed2	4.58576	0.927	0.784
Snu13	4.58217	0.982	0.84
Coro2a	4.56712	0.364	0.018
Gm8369	4.5438	0.545	0.016
Sdcbp2	4.53357	0.309	0.014
Impa2	4.53025	0.345	0.009
Dnajc1	4.52208	0.764	0.364
Thoc7	4.46407	0.818	0.568
Il18rap	4.4567	0.509	0.012
Top2b	4.43163	0.836	0.6
Cox7c	4.41003	1	0.981
Septin6	4.40609	0.727	0.017
Pcbp1	4.39197	0.909	0.81
Khdrbs1	4.35349	0.927	0.622
Klhl6	4.33737	0.509	0.023
Phip	4.29179	0.745	0.449
Hnrnpl	4.27525	0.873	0.506
Bzw1	4.26261	0.927	0.819
Dgkz	4.26086	0.6	0.188
Cfl1	4.25045	0.982	0.983
Gpsm3	4.24872	0.782	0.041
Ube2d3	4.24501	1	0.79
Furin	4.24266	0.509	0.126
Nono	4.23937	0.764	0.515
Chic2	4.23178	0.618	0.161
Banf1	4.22434	0.8	0.586
Arpc1b	4.21245	0.964	0.66
Ptpn6	4.20843	0.527	0.024
Elk3	4.20656	0.4	0.039
Elf1	4.20358	0.818	0.301
Nfatc3	4.20287	0.564	0.278
Eif3d	4.20156	0.818	0.565
Rps6ka1	4.20082	0.545	0.114
Mcm3	4.17382	0.273	0.07
Atp5k	4.1686	0.964	0.894
Gls	4.15648	0.691	0.333
Gstp3	4.15103	0.564	0.015
Ly6g5b	4.15014	0.291	0
Rac1	4.14395	1	0.895
Rhoa	4.13465	1	0.948
Hdac1	4.13421	0.727	0.365
Wdr1	4.12923	0.709	0.359
Tsn	4.12211	0.964	0.733
Glrx	4.10474	0.491	0.074
Ilk	4.08713	0.8	0.479
Cdk6	4.08075	0.418	0.019
Rnf166	4.06526	0.727	0.115
Zc3hav1	3.98684	0.691	0.265
Nudt21	3.98621	0.818	0.421
Nrip1	3.96682	0.727	0.415
Smarce1	3.94922	0.855	0.501
Fermt3	3.94454	0.6	0.027
Kmt2e	3.94391	0.927	0.718
Twf2	3.92264	0.745	0.283
Inpp4b	3.91769	0.564	0.01
Sbno1	3.91289	0.8	0.489
Pdcd1	3.88573	0.4	0.004
Cox20	3.87848	0.673	0.379
Vps28	3.86085	0.891	0.754
Wdr83os	3.84599	0.909	0.646
Zbtb1	3.84355	0.418	0.146
Snx5	3.8335	0.8	0.437
Ikzf3	3.8321	0.364	0.003
Pdcd6ip	3.82779	0.8	0.501
Ubac2	3.82339	0.618	0.274
Grap	3.81438	0.6	0.046
Satb1	3.77752	0.727	0.085
Baz1a	3.77289	0.509	0.066
Glipr1	3.76801	0.564	0.017
Lpxn	3.76787	0.618	0.011
Prkch	3.75633	0.564	0.027
Esyt1	3.74184	0.673	0.085
Usp3	3.72492	0.509	0.158
Arglu1	3.71936	0.964	0.704
Setx	3.71763	0.655	0.253
Dazap1	3.71596	0.691	0.343
Nsd3	3.71155	0.818	0.54
Prpf38b	3.70693	0.855	0.441
Atxn1	3.69854	0.527	0.169
Mapkapk3	3.67946	0.527	0.025
Acin1	3.67799	0.873	0.665
Rhof	3.67778	0.418	0.016
Rp9	3.66512	0.764	0.477
Hprt	3.66163	0.727	0.352
Mcm6	3.65072	0.382	0.056
Ppp4r3b	3.63773	0.818	0.488
Tomm22	3.62704	0.909	0.737
Dbnl	3.61771	0.8	0.389
Fam104a	3.61617	0.764	0.558
Srpk1	3.60284	0.764	0.276
Ggnbp2	3.60272	0.818	0.485
Lax1	3.59347	0.509	0.006
Utp11	3.59341	0.727	0.457
Mdp1	3.59117	0.745	0.395
Tcof1	3.57257	0.6	0.244
Tmed5	3.57116	0.873	0.683
Sltm	3.5658	0.873	0.611
Fam189b	3.55273	0.564	0.078
Atrx	3.52526	0.945	0.681
Dnajc5	3.52145	0.745	0.321
Tprgl	3.51972	0.927	0.748
Ufc1	3.51668	0.855	0.661
Cish	3.50956	0.527	0.018
Ssbp4	3.50848	0.691	0.116
Gramd3	3.50799	0.527	0.228
Aebp2	3.49959	0.673	0.332
Chd3	3.48863	0.436	0.029
Frg1	3.4823	0.855	0.547
Hnrnpll	3.4702	0.564	0.254
Txndc17	3.46564	0.945	0.717
Ubap2l	3.46072	0.891	0.583
Borcs8	3.46049	0.618	0.214
Il21r	3.45546	0.364	0.006
Gatad2a	3.43321	0.727	0.371
Was	3.40805	0.509	0.014
Ikzf1	3.39989	0.673	0.02
Nfkb2	3.39725	0.291	0.053
Rassf5	3.37447	0.655	0.021
Ttc39c	3.36844	0.436	0.124
Ctcf	3.36669	0.873	0.646
Elob	3.36094	0.982	0.96
H13	3.35703	0.782	0.38
Susd3	3.3557	0.455	0.018
Ciapin1	3.35185	0.691	0.354
9930111J21Rik2	3.3464	0.745	0.084
Def6	3.3422	0.527	0.02
Akna	3.32781	0.636	0.021
Acp5	3.31117	0.564	0.016
Lrp10	3.30928	0.673	0.32
Snx2	3.30204	0.691	0.364
Gm11808	3.30136	0.764	0.203
Uqcrb	3.29283	0.964	0.883
Ptbp1	3.29118	0.564	0.132
Tmem176b	3.28106	0.291	0.09
Dusp11	3.27538	0.873	0.567
Ccnl1	3.26218	0.727	0.389
F2r	3.25201	0.345	0.003
Bola3	3.25116	0.8	0.454
Mrpl30	3.24206	0.927	0.7
Plp2	3.24165	0.4	0.044
Niban1	3.23441	0.436	0.019
Atp2b4	3.22156	0.509	0.013
Iqgap1	3.20597	0.927	0.203
Malt1	3.20573	0.491	0.087
Ppp3cc	3.20281	0.564	0.151
Commd7	3.19694	0.764	0.312
Ly9	3.18039	0.309	0.006
Prkcsh	3.17463	0.8	0.556
Txn2	3.14415	0.873	0.543
Hnrnpr	3.1412	0.855	0.585
Dennd1b	3.13965	0.436	0.065
Nans	3.13718	0.545	0.122
Nt5dc1	3.13076	0.309	0.045
Srp72	3.10983	0.836	0.468
Ms4a6b	3.10287	0.891	0.064
Uqcrq	3.09404	0.945	0.929
Lgals3bp	3.09253	0.618	0.144
Elf4	3.0913	0.255	0.032
Tox	3.08734	0.255	0.022
Ccdc107	3.08296	0.509	0.206
Hnrnph1	3.08198	0.782	0.509
Slc38a1	3.07867	0.545	0.064
Scand1	3.07787	0.964	0.757
Znrf2	3.07062	0.655	0.106
Cd2bp2	3.06182	0.6	0.223
Tecpr1	3.06052	0.691	0.199
Ube2k	3.05447	0.855	0.658
S1pr4	3.04534	0.473	0.021
Cox17	3.04246	0.964	0.795
Sumo1	3.03426	0.945	0.752
Gimap8	3.02358	0.582	0.019
Supt5	3.01301	0.655	0.33
Bcl2l11	3.00299	0.4	0.095
Eif4e2	2.99624	0.727	0.352
Akr1b3	2.98591	0.764	0.536
Kxd1	2.9755	0.855	0.516
Ramac	2.97256	0.8	0.411
Atp5md	2.97027	0.927	0.839
Tes	2.87576	0.564	0.018
Themis	2.87021	0.509	0.008
Sash3	2.86648	0.673	0.018
Hypk	2.86463	0.673	0.335
Rpp21	2.86082	0.764	0.481
Ubash3a	2.84917	0.473	0.009
Runx2	2.84504	0.491	0.009
Usp25	2.84446	0.727	0.436
Fam107b	2.83563	0.691	0.099
Gpr171	2.83241	0.4	0.006
Kpna4	2.82904	0.691	0.401
Ppig	2.82656	0.927	0.589
Tmem167	2.82127	0.909	0.643
Dock11	2.81445	0.436	0.016
Podnl1	2.81014	0.309	0.006
Snrnp40	2.81009	0.6	0.312
Mier1	2.79546	0.855	0.547
Ostf1	2.78679	0.945	0.44
Etfa	2.78672	0.527	0.226
Pigx	2.77958	0.473	0.19
Igbp1	2.77488	0.709	0.411
Ccar1	2.77389	0.782	0.436
Ppp4c	2.76889	0.582	0.292
Dnajc9	2.76647	0.673	0.36
Dnaja2	2.76609	0.891	0.704
Stk10	2.76368	0.582	0.033
Tmem179b	2.75475	0.509	0.214
Hk1	2.74652	0.582	0.275
Sf1	2.7394	0.818	0.481
Lypla2	2.73206	0.545	0.18
Sipa1	2.72497	0.491	0.067
Grap2	2.72303	0.564	0.006
Cast	2.70981	0.691	0.121
Mknk2	2.69217	0.564	0.141
Actr2	2.68943	0.964	0.567
Ube2m	2.68407	0.909	0.65
Pdrg1	2.67886	0.673	0.387
Spag7	2.67566	0.727	0.458
Etfb	2.67563	0.836	0.557
Fam78a	2.6732	0.382	0.012
Fbl	2.67215	0.673	0.371
Clk1	2.66958	0.855	0.577
Lbh	2.65773	0.818	0.475
Nme2	2.65248	0.491	0.205
Llph	2.64417	0.818	0.609
Ptk2b	2.63209	0.509	0.037
Mob1a	2.62916	0.582	0.196
Mrps23	2.62697	0.691	0.371
Otulin	2.61325	0.764	0.293
Gna15	2.60661	0.509	0.014
Kcnn4	2.60516	0.4	0.002
Runx1	2.60187	0.436	0.041
Prf1	2.59757	0.273	0.004
Aopep	2.59509	0.727	0.387
Polr2m	2.59446	0.745	0.353
Polr2j	2.59024	0.909	0.733
Ttc14	2.58237	0.764	0.489
Rasgrp1	2.58066	0.618	0.004
Tlk1	2.57564	0.745	0.374
Rab8b	2.5709	0.655	0.197
Rasal3	2.5705	0.545	0.017
Eva1b	2.56487	0.491	0.029
Slamf1	2.56347	0.4	0.011
Cd96	2.55616	0.509	0.005
Plekhj1	2.55025	0.836	0.486
Uqcc3	2.54734	0.818	0.525
Itk	2.53689	0.6	0.006
Noc2l	2.52023	0.527	0.22
Dnajc2	2.49217	0.636	0.319
Mapkapk2	2.48775	0.527	0.174
Arf6	2.48293	0.582	0.243
Mcts1	2.48273	0.727	0.41
Pcbd2	2.48127	0.564	0.205
Ssh2	2.46983	0.745	0.375
Dcun1d5	2.46289	0.782	0.444
Il16	2.45444	0.455	0.009
Rbm38	2.44468	0.364	0.024
Sema4a	2.43216	0.345	0.024
Aup1	2.41616	0.727	0.433
Cmc1	2.4138	0.818	0.374
Nubp1	2.41311	0.564	0.216
Dok2	2.40115	0.545	0.015
Rsbn1l	2.39658	0.727	0.485
4930453N24Rik	2.39405	0.673	0.364
Adcy7	2.38863	0.418	0.013
Adam19	2.38728	0.618	0.187
Micos13	2.386	0.927	0.783
Rabgap1l	2.38166	0.618	0.27
Csnk2a2	2.37671	0.836	0.449
Vps36	2.37641	0.673	0.345
Zfp292	2.37529	0.8	0.413
Ctla4	2.35815	0.255	0.006
Lfng	2.35702	0.545	0.029
Clec2i	2.35256	0.309	0.005
Golm1	2.33315	0.364	0.018
Cnot1	2.32715	0.618	0.331
Ndufb1	2.32618	0.982	0.892
Stk38	2.32504	0.564	0.277
Lsm1	2.32234	0.727	0.382
Mrpl9	2.32187	0.673	0.402
Ccr5	2.31943	0.255	0.014
Glipr2	2.31098	0.655	0.039
Cd164	2.30849	0.764	0.345
Yy1	2.29758	0.927	0.609
Dgka	2.29408	0.418	0.049
Chsy1	2.28663	0.309	0.031
Spcs3	2.2794	0.527	0.191
Ifi208	2.27555	0.309	0.007
4930523C07Rik	2.26812	0.491	0.028
Kansl1	2.25934	0.673	0.375
Jaml	2.25867	0.382	0.01
Chordc1	2.25805	0.818	0.505
Abhd8	2.25312	0.527	0.039
Xlr4b	2.24531	0.273	0.004
Ap3s1	2.24332	0.6	0.133
Tcf7	2.24208	0.4	0.015
Mga	2.2407	0.636	0.314
Rest	2.23808	0.527	0.226
Inpp5b	2.23091	0.364	0.096
Gdi2	2.22545	0.982	0.712
Bccip	2.22455	0.655	0.318
Ndufa6	2.22021	0.982	0.847
Sesn3	2.21918	0.618	0.269
Prkcq	2.21526	0.655	0.252
Usp34	2.21402	0.764	0.507
Ttc39b	2.21133	0.545	0.051
Cdk17	2.2102	0.582	0.259
Tnfsf10	2.2029	0.327	0.03
Lamtor2	2.19601	0.982	0.727
Tmem71	2.1952	0.327	0.02
Tpp2	2.19038	0.636	0.264
Septin11	2.18791	0.491	0.092
Hells	2.18535	0.255	0.013
Sarnp	2.183	0.873	0.676
Slbp	2.17744	0.636	0.122
Rad50	2.17143	0.509	0.197
Hnrnpul2	2.16117	0.745	0.549
Nap1l4	2.15852	0.909	0.704
Ola1	2.15	0.782	0.477
Chd1	2.14729	0.655	0.269
Iqgap2	2.13991	0.309	0.008
Larp7	2.13964	0.6	0.204
Ddx24	2.13133	0.964	0.751
Tapbp	2.13	0.873	0.523
Isy1	2.12455	0.491	0.119
Snrnp70	2.12294	0.927	0.762
Ppil4	2.11308	0.727	0.382
Ubxn4	2.11203	0.909	0.695
Serpinb9	2.10031	0.309	0.048
Ppp6r1	2.09922	0.673	0.276
Cdc26	2.08796	0.818	0.501
Esco1	2.08751	0.491	0.21
Aimp1	2.08519	0.909	0.717
AI467606	2.08258	0.509	0.018
Pcmt1	2.08239	0.836	0.599
Raly	2.07345	0.891	0.691
Ptpn2	2.06631	0.618	0.181
Nfatc1	2.06613	0.491	0.014
Lrrc8c	2.06322	0.636	0.287
Sae1	2.06175	0.527	0.175
Hpcal1	2.0599	0.418	0.125
Prmt1	2.05479	0.836	0.549
Tor2a	2.04765	0.509	0.196
Plaa	2.04509	0.527	0.212
Eif4ebp2	2.03463	0.545	0.166
Smap1	2.03122	0.927	0.693
Slfn8	2.03112	0.418	0.047
Nae1	2.02339	0.673	0.394
Gpbp1l1	2.01268	0.709	0.381
Phf12	2.01101	0.618	0.247
1110008P14Rik	2.01077	0.727	0.413

## Sheet: contaminating endo vs OL
DE of endothelial oligodendroglial cluster vs other oligodendroglial clusters
pct.1- percent positive in endothelial oligodendroglia cluster
pct.2- percent positive in other oligodendroglia
av_Log2F- enrichment in endothelial oligodendroglia cluster compared to other oligodendroglia
	avg_log2FC	pct.1	pct.2
Ctla2a	313.074	0.82	0.164
Igfbp7	222.216	1	0.112
Bsg	176.076	0.98	0.868
Cldn5	66.4308	0.94	0.125
Spock2	57.7963	0.9	0.072
Ramp2	46.908	0.96	0.101
Rhoc	44.9203	0.76	0.41
Edn1	44.8409	0.3	0.004
Itm2a	43.3978	0.88	0.056
Tm4sf1	40.8794	0.82	0.029
Cxcl12	38.9635	0.76	0.11
Slco1a4	38.874	0.82	0.045
Slc2a1	37.7338	0.96	0.532
Ier3	34.6649	0.56	0.047
Akap12	33.1432	0.7	0.031
Pltp	31.6615	0.86	0.059
Egfl7	31.2229	0.92	0.045
Timp3	30.8365	0.84	0.075
Sparcl1	30.3042	0.86	0.088
Cd93	28.9483	0.7	0.011
Col4a1	28.9413	0.7	0.014
Atox1	28.0271	0.98	0.782
Klf2	26.1335	0.92	0.091
Flt1	26.0106	0.94	0.05
Id1	24.773	0.92	0.088
Id3	23.5403	0.96	0.084
Emcn	23.1707	0.84	0.014
Tmem252	23.123	0.62	0.015
Serinc3	21.97	1	0.728
Kitl	21.7131	0.82	0.012
Slco1c1	21.6563	0.82	0.023
Tsc22d1	21.2063	0.92	0.156
Plat	21.0859	0.76	0.123
Epas1	21.0519	0.88	0.176
Ptprb	20.7339	0.86	0.025
Adgrl4	20.7321	0.86	0.016
Nfkbia	20.2143	0.98	0.834
Abcg2	20.0701	0.86	0.082
Igf1r	19.1235	0.88	0.419
Abcb1a	17.6468	0.88	0.03
Car4	17.5949	0.58	0.012
Col4a2	17.4083	0.64	0.011
Pdgfb	17.3835	0.72	0.011
Pecam1	17.3387	0.82	0.031
S1pr1	17.2475	0.88	0.037
Sparc	16.9565	0.96	0.737
Vwa1	16.576	0.86	0.197
Cfh	15.9794	0.26	0.013
Ecscr	15.9665	0.54	0.01
Sptbn1	15.8245	0.98	0.778
Tinagl1	14.4865	0.66	0.014
Ly6c1	14.4676	0.94	0.167
Cd34	14.3726	0.78	0.04
Sgms1	13.8784	0.84	0.239
Cd2ap	13.1191	0.9	0.384
Esam	13.0243	0.94	0.022
Itih5	12.9655	0.78	0.365
BC028528	12.7299	0.64	0.103
Slc9a3r2	12.6967	0.86	0.294
Tspan13	12.2875	0.84	0.051
Pcp4l1	11.5783	0.8	0.02
Sptan1	11.5481	0.74	0.328
Jcad	11.3704	0.84	0.065
Polk	11.2746	0.62	0.121
Anxa3	11.1628	0.82	0.032
Bmpr2	10.7342	0.9	0.443
Net1	10.6478	0.54	0.019
Klf6	10.5377	0.8	0.42
Slc7a1	10.1763	0.6	0.031
Adgrf5	9.91352	0.92	0.024
Slc39a10	9.83981	0.72	0.127
Slc3a2	9.82156	0.92	0.665
Eng	9.55354	0.8	0.022
Clec2d	9.54915	0.78	0.123
Rras	9.54016	0.84	0.167
Crip2	9.43745	0.92	0.439
Nostrin	9.37999	0.66	0.014
Sema7a	9.30127	0.82	0.228
Ccdc141	9.09567	0.82	0.013
Wfdc1	9.03594	0.76	0.015
Gpcpd1	8.97756	0.74	0.15
Utrn	8.92944	0.76	0.041
Itga6	8.87745	0.76	0.009
Sox17	8.83138	0.7	0.004
Kank3	8.79271	0.82	0.03
Apold1	8.75937	0.3	0.014
Myo10	8.75395	0.52	0.015
Anxa2	8.54643	0.66	0.139
Sult1a1	8.47771	0.58	0.166
Tjp1	8.45409	0.9	0.617
Ablim1	8.01737	0.78	0.07
Sema3c	7.99441	0.76	0.009
Slc7a5	7.97071	0.78	0.029
Fry	7.86639	0.68	0.153
Arl4a	7.82898	0.8	0.198
Laptm4a	7.80288	0.98	0.821
Sox18	7.68841	0.78	0.011
Cavin2	7.58689	0.66	0.187
Ltbp4	7.57669	0.66	0.037
Ccn2	7.5448	0.42	0.004
Lmo2	7.47633	0.56	0.015
Cracr2b	7.35419	0.56	0.006
Bok	7.32863	0.3	0.006
F11r	7.3267	0.58	0.009
Mef2c	7.29691	0.46	0.015
Cd200	7.25416	0.74	0.136
Sorbs1	7.10941	0.52	0.088
Tgfb2	7.0547	0.4	0.023
Plcb4	7.04879	0.58	0.103
Slc30a1	7.03873	0.62	0.114
Rasip1	6.94838	0.74	0.122
Srarp	6.94342	0.58	0.015
Palmd	6.93342	0.66	0.013
Itga1	6.851	0.72	0.02
Esyt2	6.72643	0.74	0.201
Srgap2	6.60968	0.5	0.182
Acvrl1	6.52927	0.86	0.019
Sorbs2	6.36774	0.68	0.01
Adam15	6.33776	0.82	0.439
Apcdd1	6.2134	0.62	0.062
Mecom	6.20242	0.56	0.002
Cyyr1	6.13163	0.68	0.014
Abcc4	6.10484	0.64	0.023
Tpm4	6.00278	0.84	0.189
Slc6a6	5.99773	0.92	0.767
AU021092	5.98398	0.56	0.005
Nebl	5.97069	0.58	0.025
Vwf	5.96846	0.44	0.009
Podxl	5.82424	0.7	0.018
Ece1	5.72272	0.8	0.072
Ocln	5.69865	0.62	0.008
Fas	5.51153	0.54	0.028
Usp53	5.49203	0.52	0.163
Tsc22d3	5.46312	0.78	0.382
Fnbp1l	5.36651	0.7	0.019
Adamts1	5.35671	0.34	0.099
Bnip2	5.32928	0.74	0.344
Kdr	5.31181	0.72	0.034
Mcc	5.29476	0.32	0.01
Cp	5.25803	0.32	0.008
Iqgap1	5.23189	0.82	0.212
Degs2	5.19057	0.46	0.008
Foxq1	5.12276	0.7	0.008
Cdh5	5.09773	0.76	0.013
Lef1	5.06287	0.6	0.03
Grrp1	5.0285	0.58	0.007
Alas1	5.01956	0.8	0.267
Lsr	5.01781	0.74	0.017
Arhgap31	4.92537	0.72	0.28
Ctnnb1	4.8987	0.86	0.584
Ebf1	4.87802	0.58	0.008
Cert1	4.74242	0.8	0.368
Rbpms	4.72529	0.64	0.02
Tnfaip1	4.71802	0.56	0.101
Mprip	4.70898	0.8	0.478
Arhgef12	4.6187	0.86	0.55
Fli1	4.59822	0.48	0.051
Ppic	4.56415	0.3	0.008
Slc40a1	4.48972	0.4	0.004
Prom1	4.48836	0.62	0.014
Fcgrt	4.47253	0.74	0.011
Ccdc85b	4.44515	0.94	0.609
Tgfbr2	4.41264	0.66	0.045
Paqr5	4.39672	0.78	0.006
Arhgap29	4.34673	0.7	0.032
Tek	4.34539	0.62	0.006
Irf2bpl	4.30862	0.62	0.227
Zfp36l1	4.29468	0.7	0.065
Icam2	4.25268	0.58	0.016
St3gal6	4.14333	0.7	0.059
Tmem204	4.09959	0.62	0.006
Klf4	4.09259	0.66	0.062
Luzp1	3.94678	0.78	0.114
Jam2	3.89597	0.72	0.045
Snrk	3.87806	0.72	0.126
Rgs12	3.85516	0.5	0.02
Foxc1	3.78319	0.5	0.003
Clec14a	3.76167	0.4	0.01
Prss23	3.75256	0.42	0.006
Acer2	3.74955	0.38	0.039
Cavin1	3.71506	0.66	0.016
Stk38	3.66751	0.62	0.276
Cd151	3.65368	0.74	0.242
Xdh	3.62223	0.56	0.031
Prex2	3.56878	0.6	0.009
Cnot6l	3.55721	0.76	0.307
Rasd1	3.52783	0.28	0.007
Plcb1	3.49711	0.44	0.026
Adgrl2	3.49563	0.42	0.004
Tshz2	3.44513	0.54	0.007
Serpinh1	3.41172	0.54	0.051
Rgcc	3.40314	0.68	0.045
N4bp3	3.39422	0.38	0.005
Car5a	3.35666	0.38	0.003
Cav1	3.34199	0.44	0.045
Cav2	3.32725	0.64	0.058
Tiam1	3.30733	0.46	0.038
Ecm1	3.30677	0.48	0.051
Csrp2	3.28419	0.54	0.043
Rasgrp2	3.26939	0.52	0.037
Ssbp4	3.17057	0.66	0.12
Clic5	3.09391	0.6	0.12
Plpp1	3.05846	0.38	0.111
Fzd4	3.04418	0.6	0.015
Garre1	3.02164	1	0.696
Tns1	3.01616	0.58	0.09
Robo4	2.98602	0.48	0.006
Foxp1	2.97823	0.9	0.447
Svil	2.90978	0.36	0.069
Stra6	2.8955	0.4	0.005
Nrp1	2.89404	0.48	0.022
Mrtfb	2.87488	0.62	0.182
Cgnl1	2.86308	0.42	0.001
Notch1	2.86154	0.74	0.077
Skil	2.86072	0.52	0.205
Cyb5r3	2.84291	0.52	0.19
Hmcn1	2.78975	0.4	0.004
Maoa	2.78676	0.62	0.299
Gna11	2.74463	0.86	0.561
Afap1l1	2.73331	0.62	0.233
Cmtm8	2.72917	0.54	0.003
Bcam	2.69324	0.52	0.012
Myo1b	2.66756	0.46	0.004
Wwtr1	2.66006	0.52	0.011
C130074G19Rik	2.63569	0.4	0.005
Lipa	2.62866	0.68	0.302
Hes1	2.61675	0.46	0.009
Ptprr	2.59372	0.28	0.004
Rai14	2.59214	0.42	0.011
Abhd2	2.54005	0.72	0.204
Tbc1d4	2.51674	0.46	0.036
Dab2ip	2.51195	0.88	0.233
Aqp11	2.50329	0.42	0.041
Nxpe4	2.50051	0.34	0.072
Adgrg1	2.46175	0.58	0.074
Eogt	2.44367	0.5	0.02
Grap	2.42595	0.54	0.051
Uaca	2.40749	0.48	0.012
Nos3	2.40474	0.44	0.028
Slc16a2	2.38291	0.62	0.117
Fmo2	2.37873	0.28	0.001
Jag2	2.33738	0.34	0.002
Ehd2	2.33359	0.28	0.009
Slco2b1	2.3049	0.5	0.044
Hrct1	2.29989	0.32	0.009
Pitpnc1	2.28945	0.46	0.034
Ifnar1	2.28458	0.6	0.194
St6galnac2	2.26587	0.4	0.009
Gch1	2.26415	0.36	0.027
Tdrp	2.24102	0.32	0.014
Gata2	2.23281	0.62	0.004
Cd320	2.22133	0.64	0.21
Tbx1	2.21262	0.32	0.002
Slc16a9	2.20671	0.3	0
Lamb2	2.19102	0.52	0.008
Kctd12	2.17714	0.36	0.025
Gpr146	2.17687	0.56	0.142
Gja1	2.13916	0.26	0.014
Ripor1	2.12872	0.42	0.029
Atp10a	2.10745	0.44	0.016
Pttg1ip	2.07298	0.9	0.459
Tnfsf10	2.0459	0.38	0.029
Tmod3	2.03884	0.72	0.315
Midn	2.02533	0.36	0.08
Mfng	2.02036	0.3	0.028

## Sheet: contamining myeloid vsmyeloid
DE of myeloid oligodendroglial cluster vs myeloid cluster not in oligodendroglial cluster
pct.1- percent positive in myeloid oligodendroglial cluster
pct.2- percent positive in other myeloid
av_Log2F- enrichment in myeloid oligodendroglial cluster compared to other myeloid
	avg_log2FC	pct.1	pct.2
Ptgds	5.85626	0.96	0.522
Plp1	5.76917	1	0.335
Apod	4.53853	1	0.487
Mal	4.16593	0.84	0.107
Trf	4.09907	0.92	0.285
Aplp1	3.89887	0.88	0.08
Mobp	3.68466	0.92	0.103
Cnp	3.5933	0.84	0.165
Cryab	3.56705	0.84	0.12
Ermn	3.55912	0.84	0.077
Scd2	3.55679	0.88	0.166
Mag	3.5191	0.8	0.077
Gpm6b	3.49915	0.8	0.051
Mbp	3.46717	0.88	0.405
Cldn11	3.46627	0.84	0.058
Glul	3.34028	0.92	0.323
Gatm	3.28073	0.8	0.194
Car2	3.27133	0.8	0.117
Apoe	3.25503	0.96	0.289
Qdpr	3.21432	0.92	0.101
Fn1	3.19389	0.64	0.096
Sgk1	3.05313	0.84	0.287
Septin4	2.95534	0.84	0.069
Tspan2	2.83983	0.8	0.153
Fez1	2.79095	0.72	0.058
Syt11	2.77353	0.76	0.098
Kif1b	2.71946	0.84	0.289
Tuba1a	2.71088	0.8	0.399
Mog	2.68875	0.76	0.032
Qk	2.64726	0.84	0.528
Dbi	2.63342	0.88	0.498
Kctd13	2.57965	0.68	0.12
Enpp2	2.57321	0.64	0.047
Ppp1r14a	2.5558	0.72	0.059
Stmn4	2.50201	0.72	0.043
Stmn1	2.50183	0.88	0.323
Tcf4	2.48452	0.72	0.11
Csrp1	2.48277	0.76	0.194
Dpysl2	2.48152	0.72	0.12
Ptn	2.47191	0.68	0.071
Mapt	2.45766	0.8	0.046
Prdx1	2.41633	0.84	0.344
Ccr2	2.41263	0.56	0.077
Edil3	2.40846	0.72	0.016
Ckb	2.36932	0.76	0.192
Septin7	2.34728	0.92	0.686
Tubb4a	2.32842	0.56	0.044
Grb14	2.31171	0.72	0.033
Nkx6-2	2.30673	0.64	0.032
Cd81	2.29477	0.8	0.358
Ywhaq	2.29169	0.8	0.454
Anln	2.27916	0.72	0.146
Hapln2	2.27127	0.68	0.021
Bin1	2.25875	0.68	0.108
Ank2	2.25703	0.72	0.016
Selenow	2.22221	0.76	0.24
Sez6l2	2.20676	0.52	0.04
Kcna1	2.19789	0.72	0.013
Pex5l	2.19618	0.64	0.033
Slc12a2	2.18785	0.6	0.025
Ttll7	2.18409	0.6	0.031
Rtn4	2.13607	0.84	0.708
Selenop	2.11408	0.68	0.26
Tmod2	2.11075	0.68	0.03
Etv1	2.10619	0.6	0.011
Crip1	2.0779	0.76	0.254
Cmtm5	2.05092	0.6	0.022
Efnb3	2.04778	0.72	0.014
Hsp90ab1	2.0423	0.92	0.692
Endod1	2.03698	0.76	0.048
Thra	2.02638	0.72	0.087
Aspa	2.01709	0.6	0.024
Ndrg1	2.00964	0.72	0.271
Ms4a6c	2.00242	0.4	0.049

## Sheet: contaminating T cell vsT cell
DE of T cell oligodendroglial cluster vs T cell cluster not in oligodendroglial cluster
pct.1- percent positive in T cell oligodendroglial cluster
pct.2- percent positive in other T cell
av_Log2F- enrichment in T cell oligodendroglial cluster compared to other T cell
	avg_log2FC	pct.1	pct.2
Apod	6.89617	1	0.428
Plp1	6.64724	1	0.285
Ptgds	6.26129	0.964	0.45
Trf	5.2752	0.982	0.132
Mal	4.87153	1	0.074
Cryab	4.24098	1	0.094
Car2	4.17905	1	0.075
Mobp	4.13117	1	0.077
Aplp1	4.103	1	0.11
Cldn11	4.07072	1	0.042
Scd2	3.96137	0.982	0.203
Mt1	3.74781	0.945	0.301
Mag	3.6338	0.964	0.038
Sgk1	3.63089	0.982	0.218
Mbp	3.62257	1	0.502
Glul	3.52644	1	0.21
Gpm6b	3.51375	1	0.043
Fth1	3.43842	1	0.999
Qk	3.43805	1	0.328
App	3.41792	1	0.061
Gatm	3.32656	0.982	0.057
Ermn	3.2462	1	0.298
Fez1	3.10972	1	0.028
Septin4	3.10401	0.982	0.053
Kif1b	3.07597	1	0.196
Cnp	3.06106	0.982	0.647
Cd81	3.01077	1	0.108
Ppp1r14a	3.00334	0.982	0.04
Enpp2	2.96723	0.982	0.029
Tubb4a	2.87444	0.964	0.04
Klk6	2.8281	0.491	0.027
Tspan2	2.77193	0.964	0.051
Kctd13	2.67975	0.964	0.143
Apoe	2.65571	0.855	0.177
C4b	2.64241	0.818	0.019
Rtn4	2.61993	1	0.54
Qdpr	2.52438	0.964	0.315
Anln	2.43585	0.891	0.064
Gng11	2.37841	0.873	0.044
Csrp1	2.3567	0.982	0.326
Ptn	2.31142	0.891	0.034
Syt11	2.30959	0.964	0.388
Cd63	2.30926	0.8	0.039
Gsn	2.30624	0.927	0.123
Ndrg1	2.29277	0.909	0.081
Serpina3n	2.27756	0.564	0.017
Selenop	2.20636	0.818	0.344
Mapt	2.20323	0.945	0.035
Fabp5	2.19726	0.873	0.371
Rhob	2.17431	0.945	0.044
Tuba1a	2.16674	1	0.505
Il33	2.15742	0.727	0.014
Lamp1	2.1368	1	0.455
Prnp	2.1345	0.982	0.113
Cd9	2.12464	0.945	0.235
Slc12a2	2.11982	0.927	0.066
Dbi	2.08062	1	0.757
Stmn1	2.06251	1	0.305

## Sheet: contaminating endo vs endo
DE of endothelial oligodendroglial cluster vs endothelial cluster not in oligodendroglial cluster
pct.1- percent positive in endothelial oligodendroglial cluster
pct.2- percent positive in other endothelial
av_Log2F- enrichment in endothelial oligodendroglial cluster compared to other endothelial
	avg_log2FC	pct.1	pct.2
Plp1	6.62618	1	0.219
Ptgds	6.62011	0.96	0.338
Trf	4.9985	1	0.099
Apod	4.97069	1	0.561
Mbp	4.55554	1	0.082
Mobp	4.47109	1	0.046
Cryab	4.45436	1	0.059
Aplp1	4.39145	1	0.085
Cnp	4.05921	0.98	0.143
Mag	4.00514	0.96	0.022
Ermn	4.00176	0.96	0.042
Cldn11	4.00119	1	0.037
Scd2	3.91043	0.98	0.156
Gpm6b	3.79052	1	0.022
Tubb4a	3.50412	1	0.027
Car2	3.27203	1	0.389
Fez1	3.26323	0.96	0.071
Tspan2	3.20257	0.98	0.025
Syt11	3.18183	1	0.099
Ppp1r14a	3.03816	0.94	0.027
Kctd13	3.02252	0.96	0.049
Anln	2.79946	0.84	0.012
Cd63	2.7683	0.86	0.032
Bin1	2.74437	0.96	0.101
Ckb	2.73154	0.94	0.228
Tsc22d4	2.71329	1	0.175
Enpp2	2.69965	1	0.16
Tppp3	2.67535	0.74	0.02
Tmod2	2.66999	0.94	0.028
Il33	2.66152	0.7	0.009
Septin4	2.62165	0.96	0.294
Fth1	2.5704	1	0.997
Sgk1	2.55997	1	0.491
Gsn	2.5298	0.88	0.026
Qdpr	2.52852	0.98	0.3
C4b	2.517	0.66	0.021
Zeb2	2.43812	0.94	0.041
Kif1b	2.42779	1	0.397
Fabp5	2.42476	0.86	0.053
Ptprd	2.39142	0.94	0.04
Abca2	2.36938	0.96	0.063
Opalin	2.33692	0.66	0.006
Slc12a2	2.29344	0.96	0.111
Csrp1	2.23145	1	0.326
Rtn4	2.20791	0.98	0.552
Klk6	2.20377	0.44	0.015
Hsp90aa1	2.18673	1	0.616
Psat1	2.17301	0.88	0.019
Htra1	2.14694	1	0.104
Phgdh	2.11732	0.86	0.039
Endod1	2.10416	0.96	0.16
Hopx	2.07944	0.38	0.058
Dbi	2.07378	1	0.628
Tubb3	2.0669	0.62	0.01
Gstp1	2.01544	0.98	0.304
Mt1	2.00877	0.98	0.693
