# Supplementary material for: MHC class I and MHC class II reporter mice enable analysis of immune oligodendroglia in mouse models of multiple sclerosis
Source: eLife. 2023 Apr 14;12:e82938. doi: 10.7554/eLife.82938 (PMC10181822; doi:10.7554/eLife.82938)
Supplement: Figure 10—source data 1. [file elife-82938-fig10-data1.xlsx]

## Sheet: DE oligo clusters
DE of oligodendroglial subclusters
pct.1- percent positive in oligodendroglia subcluster
pct.2- percent positive in other oligodendroglia subclusters
av_Log2F- enrichment in oligodendroglial subcluster compared to other oligodendroglia clusters
	avg_log2FC	pct.1	pct.2	cluster	gene
Mal	1.21077	0.995	0.958	1	Mal
Ptn	1.13852	0.991	0.795	1	Ptn
Desi1	1.12943	0.977	0.717	1	Desi1
Opalin	1.09271	0.85	0.493	1	Opalin
Ccp110	1.05099	0.879	0.531	1	Ccp110
Ttll7	0.989504	0.991	0.859	1	Ttll7
Ptprd	0.970079	0.991	0.843	1	Ptprd
Grb14	0.939697	0.972	0.839	1	Grb14
Clmn	0.897845	0.85	0.55	1	Clmn
Qdpr	0.875537	0.991	0.934	1	Qdpr
Bin1	0.838029	0.995	0.909	1	Bin1
Sema6d	0.822022	0.762	0.477	1	Sema6d
Edil3	0.793655	0.986	0.892	1	Edil3
Gatm	0.764698	0.991	0.974	1	Gatm
Mapt	0.760619	0.986	0.873	1	Mapt
Grm3	0.749084	0.673	0.328	1	Grm3
Tmem229a	0.730249	0.874	0.668	1	Tmem229a
Fnbp1	0.727486	0.949	0.836	1	Fnbp1
Eps15	0.727404	0.874	0.657	1	Eps15
Septin4	0.725256	0.995	0.946	1	Septin4
Ank2	0.723572	1	0.905	1	Ank2
Dnajb2	0.719361	0.981	0.851	1	Dnajb2
Lpar1	0.708281	0.921	0.72	1	Lpar1
Vmp1	0.705566	0.977	0.894	1	Vmp1
Enpp2	0.692512	0.995	0.904	1	Enpp2
Daam1	0.691713	0.794	0.589	1	Daam1
Gpm6b	0.685472	1	0.961	1	Gpm6b
Septin7	0.679226	0.995	0.958	1	Septin7
Cd81	0.677321	0.995	0.967	1	Cd81
Plp1	0.675594	0.995	0.986	1	Plp1
D16Ertd472e	0.673907	0.738	0.568	1	D16Ertd472e
Sez6l2	0.670807	0.977	0.881	1	Sez6l2
Amer2	0.670716	0.785	0.533	1	Amer2
Tspan2	0.668354	0.991	0.917	1	Tspan2
Ypel2	0.660588	0.818	0.575	1	Ypel2
Chn2	0.656798	0.836	0.558	1	Chn2
Pde8a	0.640584	0.79	0.596	1	Pde8a
Shtn1	0.63881	0.729	0.489	1	Shtn1
Erbin	0.637241	0.916	0.798	1	Erbin
Ndrg2	0.633797	0.607	0.419	1	Ndrg2
Fryl	0.631328	0.748	0.57	1	Fryl
Tmod2	0.629855	0.977	0.862	1	Tmod2
Stmn1	0.628066	0.995	0.938	1	Stmn1
Ugt8a	0.608795	0.977	0.827	1	Ugt8a
Cldn11	0.605123	0.995	0.944	1	Cldn11
Kif1b	0.604432	1	0.955	1	Kif1b
Pcdh9	0.602714	0.977	0.816	1	Pcdh9
Dpysl2	0.600599	0.991	0.921	1	Dpysl2
Ckb	0.600275	0.995	0.946	1	Ckb
Smco3	0.59543	0.762	0.508	1	Smco3
Ano4	0.591128	0.57	0.312	1	Ano4
Abhd17b	0.59025	0.836	0.641	1	Abhd17b
Prr18	0.587748	0.701	0.503	1	Prr18
Cmtm5	0.582571	0.977	0.799	1	Cmtm5
Atp8a1	0.579554	0.935	0.793	1	Atp8a1
Phgdh	0.579337	0.981	0.847	1	Phgdh
Ank3	0.572029	0.939	0.85	1	Ank3
Elovl6	0.569943	0.542	0.352	1	Elovl6
Retreg1	0.567715	0.935	0.797	1	Retreg1
Mast4	0.565656	0.958	0.844	1	Mast4
Zeb2	0.560615	0.967	0.905	1	Zeb2
Hhip	0.556508	0.664	0.43	1	Hhip
Kctd13	0.555241	0.995	0.92	1	Kctd13
Hsp90aa1	0.550866	0.995	0.988	1	Hsp90aa1
Qk	0.548581	1	0.985	1	Qk
Gnai1	0.544586	0.939	0.797	1	Gnai1
Ube2d1	0.54435	0.883	0.751	1	Ube2d1
Arrdc3	0.542427	0.832	0.684	1	Arrdc3
mt-Nd2	0.540758	0.995	0.995	1	mt-Nd2
Trim59	0.540286	0.888	0.725	1	Trim59
Clasp2	0.533147	0.93	0.726	1	Clasp2
Gprc5b	0.533132	0.86	0.753	1	Gprc5b
Mbnl2	0.531916	0.986	0.911	1	Mbnl2
mt-Nd4	0.529555	0.991	0.995	1	mt-Nd4
Trp53bp2	0.528715	0.621	0.48	1	Trp53bp2
Gab1	0.52257	0.841	0.669	1	Gab1
Cdc42bpa	0.522154	0.967	0.867	1	Cdc42bpa
Nbas	0.520633	0.575	0.371	1	Nbas
Cnp	0.519653	0.995	0.967	1	Cnp
Unc5b	0.512371	0.696	0.524	1	Unc5b
Ppp1r16b	0.511059	0.967	0.873	1	Ppp1r16b
Csrp1	0.509081	0.991	0.947	1	Csrp1
Rnf13	0.508139	0.991	0.92	1	Rnf13
Gjc3	0.506287	0.949	0.793	1	Gjc3
Olig1	0.505583	0.949	0.824	1	Olig1
Syt11	0.502879	0.995	0.961	1	Syt11
Phlpp1	0.500343	0.907	0.755	1	Phlpp1
Aplp2	0.50034	0.986	0.92	1	Aplp2
Cntn2	0.499619	0.963	0.828	1	Cntn2
Gstp1	0.499164	0.963	0.846	1	Gstp1
Evi2a	0.497128	0.977	0.801	1	Evi2a
Pcsk1n	0.496779	0.925	0.741	1	Pcsk1n
Tppp	0.496228	0.893	0.744	1	Tppp
Slain1	0.496063	0.977	0.828	1	Slain1
Pls1	0.490733	0.808	0.612	1	Pls1
Gpr37	0.487445	0.967	0.871	1	Gpr37
Rcan2	0.484088	0.93	0.844	1	Rcan2
Erbb3	0.483628	0.589	0.385	1	Erbb3
Foxn3	0.483303	0.977	0.85	1	Foxn3
App	0.477845	0.995	0.963	1	App
Hebp1	0.476017	0.523	0.316	1	Hebp1
Reep5	0.475924	0.995	0.93	1	Reep5
Fa2h	0.475184	0.967	0.832	1	Fa2h
Efhd1	0.474942	0.813	0.652	1	Efhd1
mt-Cytb	0.474059	0.995	1	1	mt-Cytb
Cep97	0.473821	0.528	0.337	1	Cep97
5031439G07Rik	0.47108	0.916	0.76	1	5031439G07Rik
Hipk2	0.469462	0.827	0.734	1	Hipk2
Add1	0.466873	0.841	0.696	1	Add1
Daam2	0.464493	0.822	0.682	1	Daam2
Phldb1	0.461325	0.822	0.713	1	Phldb1
Dock10	0.460355	0.893	0.772	1	Dock10
Gamt	0.459513	0.752	0.556	1	Gamt
Faim2	0.456784	0.682	0.531	1	Faim2
Dst	0.454022	0.888	0.835	1	Dst
Exoc6b	0.453203	0.706	0.579	1	Exoc6b
Stmn4	0.449852	0.991	0.932	1	Stmn4
Mobp	0.444372	0.995	0.961	1	Mobp
Tmcc2	0.443527	0.621	0.461	1	Tmcc2
Cttnbp2	0.440511	0.598	0.417	1	Cttnbp2
Hsp90ab1	0.439936	0.995	0.997	1	Hsp90ab1
Pak1	0.439325	0.925	0.837	1	Pak1
Lgi3	0.437568	0.874	0.734	1	Lgi3
Fbxl5	0.436572	0.692	0.558	1	Fbxl5
Dusp26	0.435665	0.883	0.772	1	Dusp26
Kif13a	0.434212	0.565	0.407	1	Kif13a
Slc48a1	0.432255	0.958	0.846	1	Slc48a1
Nipa1	0.429635	0.822	0.696	1	Nipa1
Cryab	0.428486	0.995	0.985	1	Cryab
Mettl7a1	0.427262	0.799	0.661	1	Mettl7a1
Slc24a2	0.427037	0.911	0.775	1	Slc24a2
Ptgds	0.42694	0.991	0.907	1	Ptgds
mt-Nd4l	0.426451	0.958	0.913	1	mt-Nd4l
Abcg1	0.425546	0.785	0.617	1	Abcg1
mt-Co1	0.425003	0.991	1	1	mt-Co1
Nfix	0.422047	0.972	0.879	1	Nfix
Arsg	0.421882	0.603	0.488	1	Arsg
Ttyh2	0.421585	0.874	0.721	1	Ttyh2
Olig2	0.419396	0.696	0.47	1	Olig2
Pnrc1	0.419307	0.822	0.707	1	Pnrc1
Psat1	0.417435	0.972	0.869	1	Psat1
Osbpl1a	0.417385	0.916	0.759	1	Osbpl1a
Snx30	0.415531	0.607	0.504	1	Snx30
Alcam	0.414971	0.551	0.354	1	Alcam
Srcin1	0.412674	0.79	0.696	1	Srcin1
Dennd5a	0.41255	0.794	0.686	1	Dennd5a
Plekhh1	0.412308	0.855	0.736	1	Plekhh1
Epb41l3	0.408658	0.953	0.814	1	Epb41l3
Timp2	0.406923	0.71	0.568	1	Timp2
mt-Nd5	0.40593	0.967	0.938	1	mt-Nd5
Sh3gl3	0.404772	0.654	0.558	1	Sh3gl3
Gna12	0.401352	0.855	0.698	1	Gna12
Dnaja1	0.401318	0.921	0.864	1	Dnaja1
Ptma	0.400983	0.995	0.997	1	Ptma
Mog	0.400375	0.995	0.912	1	Mog
Myo6	0.397845	0.902	0.804	1	Myo6
Slc8a1	0.397744	0.509	0.388	1	Slc8a1
Pafah1b1	0.396209	0.981	0.932	1	Pafah1b1
mt-Co3	0.393858	0.995	1	1	mt-Co3
Arpc1a	0.391894	0.981	0.951	1	Arpc1a
Map6d1	0.391192	0.542	0.389	1	Map6d1
Rdx	0.390329	0.93	0.875	1	Rdx
Fez1	0.39029	0.995	0.958	1	Fez1
Cavin3	0.388994	0.804	0.648	1	Cavin3
Clic4	0.388693	0.921	0.863	1	Clic4
Slu7	0.387202	0.794	0.672	1	Slu7
Ppp2r3a	0.387163	0.808	0.718	1	Ppp2r3a
Tcf4	0.386571	0.93	0.89	1	Tcf4
Scd2	0.381712	0.995	0.984	1	Scd2
Tmeff1	0.379369	0.888	0.763	1	Tmeff1
Scamp5	0.379013	0.556	0.427	1	Scamp5
Tyro3	0.37845	0.64	0.541	1	Tyro3
Plxdc2	0.377687	0.706	0.572	1	Plxdc2
Il33	0.377082	0.944	0.648	1	Il33
Ppp1cc	0.37523	0.738	0.678	1	Ppp1cc
Dbi	0.374331	1	0.988	1	Dbi
Sort1	0.374051	0.743	0.619	1	Sort1
Hepacam	0.372265	0.883	0.779	1	Hepacam
Plekhb1	0.371128	0.935	0.824	1	Plekhb1
Trim2	0.37006	0.813	0.74	1	Trim2
Ncam1	0.369921	0.958	0.867	1	Ncam1
Dync1li2	0.369118	0.659	0.573	1	Dync1li2
Dixdc1	0.366932	0.869	0.801	1	Dixdc1
Magi2	0.366456	0.617	0.543	1	Magi2
Cdk19	0.365909	0.724	0.637	1	Cdk19
Aspa	0.364748	0.977	0.813	1	Aspa
Ldlrad4	0.364267	0.509	0.411	1	Ldlrad4
Ermn	0.364265	0.995	0.93	1	Ermn
Gphn	0.364034	0.612	0.488	1	Gphn
Hnrnpa2b1	0.359968	0.93	0.894	1	Hnrnpa2b1
Gabarapl2	0.356957	0.977	0.928	1	Gabarapl2
Plcl1	0.355644	0.939	0.848	1	Plcl1
Frmd5	0.353894	0.617	0.545	1	Frmd5
Klhl4	0.348564	0.575	0.478	1	Klhl4
Pgp	0.348044	0.907	0.85	1	Pgp
Wscd1	0.3428	0.907	0.824	1	Wscd1
Zfp638	0.34208	0.729	0.654	1	Zfp638
Fbxo7	0.341541	0.738	0.623	1	Fbxo7
Etv1	0.34094	0.935	0.783	1	Etv1
Tmem30a	0.340877	0.874	0.782	1	Tmem30a
Aktip	0.339994	0.607	0.526	1	Aktip
Sgk1	0.338728	0.991	0.92	1	Sgk1
Chchd2	0.337657	0.995	0.984	1	Chchd2
Fkbp4	0.337092	0.715	0.637	1	Fkbp4
Stard3nl	0.337071	0.734	0.649	1	Stard3nl
Josd2	0.336813	0.991	0.894	1	Josd2
Rif1	0.336304	0.589	0.526	1	Rif1
Auts2	0.335954	0.528	0.354	1	Auts2
Plaat3	0.334713	0.977	0.873	1	Plaat3
Glrb	0.330429	0.645	0.526	1	Glrb
Adi1	0.32965	0.682	0.599	1	Adi1
Prkcz	0.32848	0.757	0.636	1	Prkcz
Secisbp2l	0.326327	0.958	0.851	1	Secisbp2l
Cdkn1b	0.322924	0.71	0.598	1	Cdkn1b
Plekhg3	0.322518	0.579	0.488	1	Plekhg3
Cox6c	0.322195	0.991	0.977	1	Cox6c
Bptf	0.321378	0.696	0.649	1	Bptf
Sema6a	0.320927	0.687	0.565	1	Sema6a
Chordc1	0.320741	0.621	0.472	1	Chordc1
Bod1l	0.319614	0.664	0.661	1	Bod1l
mt-Co2	0.318572	0.991	1	1	mt-Co2
mt-Atp6	0.318369	1	1	1	mt-Atp6
Pip4k2a	0.318207	0.967	0.862	1	Pip4k2a
Itsn2	0.317609	0.621	0.527	1	Itsn2
Degs1	0.316531	0.93	0.836	1	Degs1
Tnfaip6	0.316285	0.841	0.752	1	Tnfaip6
Bpnt1	0.311648	0.636	0.535	1	Bpnt1
Map4k4	0.311232	0.864	0.778	1	Map4k4
Ppm1b	0.311168	0.505	0.444	1	Ppm1b
Cops9	0.310838	0.832	0.721	1	Cops9
Pde4b	0.310419	0.818	0.768	1	Pde4b
Tnrc6c	0.306978	0.668	0.591	1	Tnrc6c
Rtn3	0.30675	0.963	0.886	1	Rtn3
Nr3c1	0.306432	0.785	0.688	1	Nr3c1
Hsph1	0.306333	0.621	0.516	1	Hsph1
Rcbtb1	0.306271	0.794	0.709	1	Rcbtb1
Prkacb	0.306013	0.808	0.738	1	Prkacb
Ermp1	0.305617	0.71	0.57	1	Ermp1
Pou3f3	0.304346	0.659	0.604	1	Pou3f3
Creb5	0.304016	0.738	0.65	1	Creb5
Mfsd6	0.304011	0.565	0.508	1	Mfsd6
Mtmr2	0.3035	0.542	0.48	1	Mtmr2
Oxr1	0.303474	0.738	0.649	1	Oxr1
Kcnq3	0.303065	0.533	0.476	1	Kcnq3
Mpp2	0.301759	0.509	0.409	1	Mpp2
Abca2	0.300314	0.972	0.894	1	Abca2
Smim1	0.297413	0.701	0.579	1	Smim1
Gde1	0.296776	0.921	0.854	1	Gde1
Pink1	0.295824	0.687	0.636	1	Pink1
Krit1	0.295099	0.584	0.5	1	Krit1
mt-Atp8	0.294302	0.86	0.839	1	mt-Atp8
Dnajc24	0.293691	0.575	0.561	1	Dnajc24
mt-Nd1	0.293194	0.991	0.996	1	mt-Nd1
Aatk	0.293139	0.822	0.734	1	Aatk
mt-Nd3	0.292672	0.986	0.972	1	mt-Nd3
Tppp3	0.292577	0.93	0.786	1	Tppp3
D7Ertd443e	0.290133	0.785	0.675	1	D7Ertd443e
Pik3r1	0.289684	0.808	0.764	1	Pik3r1
Pura	0.286657	0.879	0.836	1	Pura
Paip1	0.285163	0.64	0.568	1	Paip1
Ralbp1	0.284907	0.771	0.721	1	Ralbp1
Pon2	0.284821	0.808	0.733	1	Pon2
Skp1	0.284387	0.771	0.705	1	Skp1
Eid1	0.284227	0.958	0.886	1	Eid1
Olfml1	0.283576	0.617	0.496	1	Olfml1
Glod4	0.282874	0.78	0.707	1	Glod4
Nisch	0.282231	0.762	0.665	1	Nisch
Cipc	0.281942	0.519	0.492	1	Cipc
Arglu1	0.280764	0.729	0.691	1	Arglu1
St13	0.280178	0.911	0.829	1	St13
Nmral1	0.280041	0.818	0.703	1	Nmral1
Tmem33	0.278961	0.734	0.653	1	Tmem33
Phyhipl	0.278194	0.804	0.698	1	Phyhipl
Cers2	0.278025	0.977	0.916	1	Cers2
Rab3a	0.277705	0.579	0.496	1	Rab3a
Ubl3	0.276769	0.855	0.795	1	Ubl3
Eif4h	0.27675	0.888	0.85	1	Eif4h
Slc6a9	0.276722	0.589	0.504	1	Slc6a9
Ppp1r21	0.276704	0.659	0.57	1	Ppp1r21
Ube3a	0.276456	0.757	0.709	1	Ube3a
Omg	0.275566	0.664	0.564	1	Omg
Snrnp48	0.274592	0.565	0.52	1	Snrnp48
P3h4	0.274364	0.621	0.584	1	P3h4
Ddx17	0.274022	0.664	0.557	1	Ddx17
Rhog	0.273398	0.86	0.77	1	Rhog
Cbx5	0.272809	0.561	0.491	1	Cbx5
Elavl3	0.271924	0.935	0.847	1	Elavl3
Atrn	0.271746	0.523	0.476	1	Atrn
Hspa8	0.271594	0.995	0.989	1	Hspa8
mt-Nd6	0.270366	0.565	0.484	1	mt-Nd6
Lrp1b	0.270109	0.762	0.684	1	Lrp1b
Fbxo2	0.269995	0.771	0.684	1	Fbxo2
Rtn4	0.269878	0.995	0.978	1	Rtn4
Tmcc1	0.268496	0.738	0.649	1	Tmcc1
Thra	0.266752	0.935	0.858	1	Thra
Tmcc3	0.263924	0.869	0.801	1	Tmcc3
Phf3	0.263671	0.715	0.648	1	Phf3
Clcn3	0.263627	0.766	0.722	1	Clcn3
Ankib1	0.260964	0.65	0.575	1	Ankib1
Bnip3l	0.260798	0.972	0.904	1	Bnip3l
Mapk8ip1	0.26056	0.93	0.856	1	Mapk8ip1
Ypel3	0.259281	0.869	0.775	1	Ypel3
Arhgap23	0.258334	0.86	0.767	1	Arhgap23
Atp6ap1	0.257979	0.771	0.702	1	Atp6ap1
Rock1	0.257947	0.818	0.745	1	Rock1
St18	0.257562	0.584	0.485	1	St18
Hecw2	0.257364	0.542	0.463	1	Hecw2
Add3	0.256653	0.822	0.694	1	Add3
Serinc5	0.255805	0.593	0.44	1	Serinc5
Bet1	0.255739	0.72	0.631	1	Bet1
Cdc42se2	0.255694	0.565	0.507	1	Cdc42se2
Kat2b	0.255665	0.72	0.63	1	Kat2b
Ttyh1	0.255024	0.514	0.325	1	Ttyh1
Nkain2	0.254974	0.551	0.477	1	Nkain2
Rb1cc1	0.254524	0.659	0.57	1	Rb1cc1
Tra2a	0.254005	0.584	0.533	1	Tra2a
1190005I06Rik	0.253732	0.664	0.565	1	1190005I06Rik
Rhob	0.252879	0.981	0.896	1	Rhob
Map7d1	0.252508	0.925	0.846	1	Map7d1
Sh3bgrl3	0.252307	0.963	0.881	1	Sh3bgrl3
Snx6	0.251979	0.762	0.696	1	Snx6
Igsf8	0.250035	0.668	0.577	1	Igsf8
Trappc10	-0.251022	0.696	0.744	1	Trappc10
Srebf2	-0.252465	0.43	0.626	1	Srebf2
Psmg4	-0.253259	0.346	0.507	1	Psmg4
Bnip3	-0.253488	0.435	0.568	1	Bnip3
Ebp	-0.254135	0.612	0.718	1	Ebp
Polr2k	-0.255297	0.449	0.599	1	Polr2k
Aldoa	-0.255332	0.949	0.958	1	Aldoa
Capzb	-0.256656	0.491	0.646	1	Capzb
Nt5c3	-0.257354	0.416	0.584	1	Nt5c3
Psmd2	-0.258103	0.579	0.686	1	Psmd2
Ggh	-0.260767	0.402	0.576	1	Ggh
Cox5a	-0.260817	0.864	0.901	1	Cox5a
Snrpd1	-0.262157	0.537	0.686	1	Snrpd1
Apbb2	-0.263204	0.692	0.763	1	Apbb2
Mrpl57	-0.264719	0.467	0.625	1	Mrpl57
Npdc1	-0.265147	0.542	0.657	1	Npdc1
Usp31	-0.266826	0.505	0.614	1	Usp31
Sc5d	-0.267909	0.575	0.679	1	Sc5d
Mrps34	-0.270009	0.43	0.598	1	Mrps34
Dbndd2	-0.27133	0.752	0.847	1	Dbndd2
Tbrg1	-0.271544	0.388	0.56	1	Tbrg1
Slc25a5	-0.271701	0.692	0.778	1	Slc25a5
Derl1	-0.27184	0.458	0.625	1	Derl1
Psmd12	-0.276719	0.542	0.729	1	Psmd12
Psma3	-0.27682	0.785	0.871	1	Psma3
Rps3	-0.278899	0.986	0.984	1	Rps3
Rpl7a	-0.280432	0.967	0.97	1	Rpl7a
H3f3b	-0.281141	0.995	0.988	1	H3f3b
Tmem125	-0.28121	0.519	0.663	1	Tmem125
Taf13	-0.282141	0.463	0.603	1	Taf13
Atpif1	-0.282177	0.575	0.714	1	Atpif1
Eif2s2	-0.283482	0.883	0.893	1	Eif2s2
Ak3	-0.283917	0.692	0.752	1	Ak3
Sys1	-0.284126	0.916	0.932	1	Sys1
Ssu72	-0.284343	0.533	0.714	1	Ssu72
Bcl2l1	-0.284951	0.706	0.793	1	Bcl2l1
Nfic	-0.2851	0.664	0.776	1	Nfic
Gpx4	-0.287087	0.991	0.974	1	Gpx4
Hsd17b12	-0.287535	0.696	0.79	1	Hsd17b12
Psma4	-0.287832	0.631	0.786	1	Psma4
Slc6a8	-0.287888	0.472	0.65	1	Slc6a8
Dnm2	-0.289991	0.715	0.783	1	Dnm2
Sv2a	-0.290058	0.79	0.82	1	Sv2a
Eif4g1	-0.290137	0.439	0.618	1	Eif4g1
Abhd17a	-0.293029	0.584	0.713	1	Abhd17a
Ctnna1	-0.293843	0.533	0.679	1	Ctnna1
Fdft1	-0.293992	0.439	0.595	1	Fdft1
Rbbp6	-0.294288	0.528	0.649	1	Rbbp6
Scarb2	-0.295345	0.71	0.768	1	Scarb2
Rps13	-0.295611	0.991	0.981	1	Rps13
Sgta	-0.296615	0.472	0.606	1	Sgta
Actr2	-0.299229	0.421	0.595	1	Actr2
Rnf181	-0.299814	0.397	0.61	1	Rnf181
Pdia3	-0.30057	0.794	0.862	1	Pdia3
Kdm4a	-0.301277	0.397	0.549	1	Kdm4a
Esd	-0.301685	0.682	0.772	1	Esd
Sin3b	-0.301691	0.425	0.599	1	Sin3b
Stxbp3	-0.302458	0.804	0.81	1	Stxbp3
Morf4l2	-0.303133	0.528	0.667	1	Morf4l2
Csf1	-0.303772	0.449	0.607	1	Csf1
Sqstm1	-0.304347	0.752	0.824	1	Sqstm1
Zfand5	-0.305238	0.664	0.747	1	Zfand5
Cdkn2d	-0.305417	0.467	0.623	1	Cdkn2d
Dctn4	-0.305513	0.668	0.72	1	Dctn4
Ndufa4	-0.305725	0.939	0.959	1	Ndufa4
Vcp	-0.30575	0.766	0.854	1	Vcp
Tmem160	-0.306414	0.425	0.621	1	Tmem160
Rrbp1	-0.307004	0.832	0.862	1	Rrbp1
Atp6v1h	-0.308538	0.402	0.527	1	Atp6v1h
Epb41l2	-0.309498	0.411	0.512	1	Epb41l2
Ppfibp2	-0.31045	0.528	0.675	1	Ppfibp2
Dcaf17	-0.313667	0.523	0.692	1	Dcaf17
Ciao2a	-0.315129	0.486	0.6	1	Ciao2a
Sash1	-0.315851	0.57	0.695	1	Sash1
Rplp0	-0.316978	0.995	0.973	1	Rplp0
Hapln2	-0.31857	0.841	0.833	1	Hapln2
Eml2	-0.31911	0.603	0.684	1	Eml2
Pou3f1	-0.321122	0.491	0.637	1	Pou3f1
Calr	-0.321921	0.836	0.86	1	Calr
Tulp4	-0.325977	0.893	0.931	1	Tulp4
P4hb	-0.32647	0.491	0.654	1	P4hb
AI413582	-0.328777	0.411	0.579	1	AI413582
Psma5	-0.331938	0.617	0.77	1	Psma5
Nampt	-0.335751	0.393	0.579	1	Nampt
Bsg	-0.337358	0.818	0.879	1	Bsg
Tbcb	-0.337747	0.692	0.808	1	Tbcb
Tfg	-0.34171	0.336	0.553	1	Tfg
Cerk	-0.34507	0.35	0.527	1	Cerk
Msrb1	-0.346557	0.78	0.836	1	Msrb1
Slc6a6	-0.346566	0.724	0.78	1	Slc6a6
Atp6v0e	-0.350594	0.72	0.843	1	Atp6v0e
Psmb4	-0.354189	0.888	0.917	1	Psmb4
Brd2	-0.359331	0.43	0.602	1	Brd2
Ftl1	-0.360045	0.991	0.991	1	Ftl1
Card19	-0.360684	0.542	0.71	1	Card19
Mrps6	-0.362228	0.477	0.619	1	Mrps6
Mrpl41	-0.362805	0.523	0.688	1	Mrpl41
Slc3a2	-0.363742	0.561	0.694	1	Slc3a2
Por	-0.365181	0.383	0.562	1	Por
Ptpra	-0.365451	0.724	0.806	1	Ptpra
Rpl27	-0.369735	0.972	0.982	1	Rpl27
Mrpl51	-0.370882	0.495	0.695	1	Mrpl51
Dpy19l1	-0.371948	0.818	0.836	1	Dpy19l1
Tmed10	-0.374837	0.981	0.97	1	Tmed10
Sox2	-0.379444	0.411	0.539	1	Sox2
Plin4	-0.382651	0.43	0.547	1	Plin4
Rps28	-0.382897	0.967	0.966	1	Rps28
1810058I24Rik	-0.384177	0.724	0.778	1	1810058I24Rik
Nme1	-0.384856	0.701	0.802	1	Nme1
Tuba1b	-0.390414	0.556	0.664	1	Tuba1b
Pomp	-0.401061	0.827	0.878	1	Pomp
Acaca	-0.403119	0.542	0.675	1	Acaca
Itm2b	-0.404939	0.995	0.985	1	Itm2b
Adipor2	-0.406803	0.86	0.885	1	Adipor2
Nde1	-0.410611	0.57	0.699	1	Nde1
Idi1	-0.41395	0.491	0.663	1	Idi1
Arf4	-0.414507	0.481	0.687	1	Arf4
Eml1	-0.418352	0.318	0.512	1	Eml1
Arpc1b	-0.419994	0.617	0.659	1	Arpc1b
Rps2	-0.423065	0.986	0.977	1	Rps2
Sec61g	-0.425075	0.841	0.905	1	Sec61g
Ifrd1	-0.426582	0.579	0.718	1	Ifrd1
Pkm	-0.429129	0.593	0.745	1	Pkm
Higd1a	-0.43169	0.682	0.767	1	Higd1a
S100a16	-0.433842	0.869	0.894	1	S100a16
Cltb	-0.441591	0.523	0.743	1	Cltb
Sulf2	-0.443971	0.607	0.755	1	Sulf2
Iqsec1	-0.444992	0.509	0.649	1	Iqsec1
Ptms	-0.462348	0.379	0.558	1	Ptms
Txnrd1	-0.468201	0.308	0.514	1	Txnrd1
Atp6v1g1	-0.468865	0.939	0.938	1	Atp6v1g1
Dusp3	-0.469479	0.589	0.724	1	Dusp3
Cab39l	-0.46988	0.393	0.549	1	Cab39l
Gapdh	-0.473579	0.944	0.973	1	Gapdh
Dynll1	-0.480635	0.85	0.855	1	Dynll1
Sparc	-0.484619	0.692	0.752	1	Sparc
Gjb1	-0.494311	0.771	0.774	1	Gjb1
Rpl12	-0.504146	0.893	0.938	1	Rpl12
Mat2a	-0.506896	0.888	0.917	1	Mat2a
Pdgfa	-0.512584	0.748	0.812	1	Pdgfa
Got1	-0.517109	0.238	0.543	1	Got1
Nap1l5	-0.521491	0.804	0.79	1	Nap1l5
Eif4a1	-0.525788	0.888	0.938	1	Eif4a1
Map1lc3a	-0.529035	0.748	0.824	1	Map1lc3a
Cyp51	-0.533086	0.43	0.633	1	Cyp51
Idnk	-0.533349	0.243	0.523	1	Idnk
Fdps	-0.534313	0.626	0.749	1	Fdps
Tmsb4x	-0.535427	1	1	1	Tmsb4x
Stat3	-0.54084	0.374	0.653	1	Stat3
Ctsd	-0.541764	0.664	0.794	1	Ctsd
Errfi1	-0.543232	0.416	0.615	1	Errfi1
Laptm4a	-0.54389	0.71	0.854	1	Laptm4a
Cirbp	-0.544075	0.463	0.718	1	Cirbp
Plin3	-0.54707	0.491	0.603	1	Plin3
S100a13	-0.549923	0.794	0.89	1	S100a13
Klf9	-0.55416	0.879	0.893	1	Klf9
Endod1	-0.55495	0.907	0.89	1	Endod1
Adssl1	-0.556102	0.706	0.846	1	Adssl1
Sat1	-0.575137	0.537	0.694	1	Sat1
Pnpla2	-0.576186	0.393	0.637	1	Pnpla2
Gsn	-0.576448	0.893	0.86	1	Gsn
Selenop	-0.589438	0.682	0.715	1	Selenop
Ddit3	-0.598324	0.364	0.539	1	Ddit3
Pcyt2	-0.602743	0.481	0.675	1	Pcyt2
Tuba1a	-0.617486	0.986	0.969	1	Tuba1a
Lamp2	-0.62135	0.911	0.93	1	Lamp2
Gltp	-0.628272	0.864	0.87	1	Gltp
Tubb4b	-0.629777	0.505	0.736	1	Tubb4b
Marcksl1	-0.635216	0.341	0.57	1	Marcksl1
Psmb2	-0.649012	0.799	0.889	1	Psmb2
Msmo1	-0.652501	0.621	0.73	1	Msmo1
Pdxk	-0.657967	0.332	0.503	1	Pdxk
Sgk3	-0.674366	0.519	0.648	1	Sgk3
Ifi27	-0.690806	0.724	0.828	1	Ifi27
Sec11c	-0.69288	0.981	0.974	1	Sec11c
Actg1	-0.706394	0.902	0.909	1	Actg1
Polr3e	-0.715255	0.603	0.692	1	Polr3e
Tmsb10	-0.720674	0.435	0.637	1	Tmsb10
Tubb5	-0.720813	0.435	0.656	1	Tubb5
Ndst1	-0.724856	0.332	0.598	1	Ndst1
Ctsb	-0.728636	0.794	0.879	1	Ctsb
Lmna	-0.731732	0.318	0.642	1	Lmna
Ldhb	-0.734731	0.28	0.5	1	Ldhb
Trf	-0.770544	0.995	0.962	1	Trf
Txn1	-0.773914	0.533	0.737	1	Txn1
Aldoc	-0.811836	0.257	0.501	1	Aldoc
Pmp22	-0.814886	0.514	0.599	1	Pmp22
Zfp771	-0.833424	0.533	0.652	1	Zfp771
Hmgcs1	-0.836051	0.631	0.772	1	Hmgcs1
Hcn2	-0.866329	0.402	0.713	1	Hcn2
Xaf1	-0.867799	0.575	0.755	1	Xaf1
Psme2	-0.873532	0.364	0.654	1	Psme2
Mcl1	-0.894373	0.5	0.69	1	Mcl1
Tapbp	-0.939001	0.21	0.604	1	Tapbp
S100a1	-0.952346	0.79	0.885	1	S100a1
Map1b	-0.956293	0.318	0.556	1	Map1b
Tap2	-1.02847	0.121	0.537	1	Tap2
Rbm3	-1.05421	0.523	0.745	1	Rbm3
Lbh	-1.07874	0.187	0.557	1	Lbh
H2-D1	-1.08488	0.836	0.943	1	H2-D1
C4b	-1.11241	0.565	0.818	1	C4b
Psmb10	-1.11512	0.154	0.515	1	Psmb10
Paqr6	-1.11941	0.131	0.505	1	Paqr6
H2-Q7	-1.14171	0.136	0.516	1	H2-Q7
Psmb9	-1.15715	0.117	0.526	1	Psmb9
Psme1	-1.15993	0.196	0.6	1	Psme1
H2-Q4	-1.20071	0.206	0.638	1	H2-Q4
Cstb	-1.20711	0.706	0.856	1	Cstb
Stat1	-1.22316	0.393	0.668	1	Stat1
B2m	-1.27361	0.757	0.934	1	B2m
Tap1	-1.34654	0.079	0.562	1	Tap1
Bst2	-1.35389	0.22	0.633	1	Bst2
Cdkn1a	-1.41664	0.458	0.638	1	Cdkn1a
H2-K1	-1.42306	0.734	0.916	1	H2-K1
Anxa5	-1.42486	0.187	0.549	1	Anxa5
Tubb3	-1.48074	0.486	0.808	1	Tubb3
Gpd1	-1.55215	0.407	0.683	1	Gpd1
Cd63	-1.61275	0.883	0.875	1	Cd63
Igtp	-1.85874	0.234	0.621	1	Igtp
Irgm1	-1.86934	0.187	0.633	1	Irgm1
Fabp5	-1.90448	0.855	0.919	1	Fabp5
S100a6	-1.95444	0.383	0.657	1	S100a6
Ifi27l2a	-2.30635	0.187	0.533	1	Ifi27l2a
Apod	-2.46592	1	0.974	1	Apod
Psmb8	-2.52671	0.243	0.686	1	Psmb8
Mt1	-2.5839	0.981	0.963	1	Mt1
Mt2	-2.60698	0.164	0.504	1	Mt2
Serpina3n	-3.08939	0.131	0.695	1	Serpina3n
H2-T23	-3.28768	0.215	0.763	1	H2-T23
Klk6	-3.64036	0.051	0.584	1	Klk6
Hopx	2.17889	0.97	0.231	2	Hopx
Klk6.1	1.89616	0.945	0.336	2	Klk6
Selenop.1	1.84151	1	0.63	2	Selenop
S100b	1.67678	0.945	0.199	2	S100b
Zfp771.1	1.50731	0.945	0.54	2	Zfp771
Anxa5.1	1.49656	0.935	0.343	2	Anxa5
Enpp6	1.46086	0.98	0.297	2	Enpp6
Plin3.1	1.39846	0.95	0.479	2	Plin3
Sypl	1.2741	0.995	0.783	2	Sypl
Ifi27l2a.1	1.27056	0.77	0.371	2	Ifi27l2a
Anln	1.16541	1	0.766	2	Anln
Pmp22.1	1.15477	0.99	0.471	2	Pmp22
Ldhb.1	1.14294	0.89	0.334	2	Ldhb
Aven	1.14016	0.845	0.226	2	Aven
Sparc.1	1.13971	0.985	0.673	2	Sparc
Nkx2-9	1.12871	0.665	0.062	2	Nkx2-9
Uchl1	1.0892	0.8	0.191	2	Uchl1
Cd59a	1.0383	0.66	0.157	2	Cd59a
Iigp1	1.01993	0.52	0.23	2	Iigp1
Serpinb1a	1.01567	0.915	0.396	2	Serpinb1a
Map1b.1	1.00199	0.91	0.394	2	Map1b
Tppp3.1	0.967571	1	0.77	2	Tppp3
Mgst3	0.964311	0.82	0.301	2	Mgst3
Ccdc152	0.960763	0.685	0.133	2	Ccdc152
Gng11	0.954904	1	0.771	2	Gng11
Cpd	0.948975	0.98	0.637	2	Cpd
Efcab14	0.94693	0.995	0.753	2	Efcab14
Slco3a1	0.935626	0.975	0.531	2	Slco3a1
Cpox	0.927425	0.995	0.785	2	Cpox
Hapln2.1	0.92223	1	0.791	2	Hapln2
Spock3	0.921415	0.93	0.379	2	Spock3
Sccpdh	0.910198	0.97	0.681	2	Sccpdh
Ermn.1	0.908083	1	0.93	2	Ermn
Gjb1.1	0.905975	0.995	0.714	2	Gjb1
Serpina3n.1	0.895281	0.795	0.508	2	Serpina3n
Tmsb4x.1	0.879808	1	1	2	Tmsb4x
Usp31.1	0.873309	0.96	0.491	2	Usp31
Gapdh.1	0.871534	1	0.957	2	Gapdh
Rapgef5	0.861922	0.69	0.098	2	Rapgef5
Cdkn1c	0.850231	0.665	0.199	2	Cdkn1c
Aldoc.1	0.845703	0.76	0.363	2	Aldoc
Iqsec1.1	0.836925	0.96	0.527	2	Iqsec1
Mapre2	0.824799	0.945	0.438	2	Mapre2
Mob3b	0.821728	0.81	0.247	2	Mob3b
Pea15a	0.820716	0.97	0.661	2	Pea15a
Mtss1	0.819555	0.865	0.259	2	Mtss1
Olfm1	0.812747	0.785	0.271	2	Olfm1
Rnd2	0.790948	0.85	0.251	2	Rnd2
Ndrg1	0.789733	1	0.874	2	Ndrg1
Rftn1	0.776735	0.86	0.267	2	Rftn1
Bhlhe41	0.774633	0.87	0.44	2	Bhlhe41
Fth1	0.767928	1	0.997	2	Fth1
Pacsin1	0.766425	0.805	0.247	2	Pacsin1
Padi2	0.76596	0.82	0.238	2	Padi2
Ppp2r2c	0.764804	0.95	0.484	2	Ppp2r2c
Gltp.1	0.763646	0.995	0.835	2	Gltp
Etv1.1	0.761835	1	0.769	2	Etv1
Dctn4.1	0.760188	0.99	0.633	2	Dctn4
Gstm1	0.759835	0.92	0.617	2	Gstm1
Pdlim2	0.757114	0.995	0.789	2	Pdlim2
Epb41l2.1	0.756301	0.915	0.376	2	Epb41l2
Cbs	0.752593	0.66	0.1	2	Cbs
Mtus1	0.75146	0.91	0.424	2	Mtus1
Fmnl2	0.744896	0.94	0.545	2	Fmnl2
Septin8	0.739672	1	0.766	2	Septin8
Ctnna2	0.737392	0.855	0.267	2	Ctnna2
Crybg3	0.736853	0.755	0.185	2	Crybg3
Rap1a	0.712433	1	0.886	2	Rap1a
Prdx1	0.705857	1	0.975	2	Prdx1
Gsn.1	0.696622	1	0.832	2	Gsn
Lbh.1	0.694584	0.82	0.382	2	Lbh
Bmp2k	0.688531	0.975	0.685	2	Bmp2k
Marcksl1.1	0.68809	0.845	0.432	2	Marcksl1
Apod.1	0.685031	1	0.975	2	Apod
Rab37	0.684394	0.64	0.102	2	Rab37
Cmtm5.1	0.675434	1	0.797	2	Cmtm5
Pla2g4a	0.673526	0.7	0.129	2	Pla2g4a
Ak3.1	0.671591	0.96	0.68	2	Ak3
Itgb4	0.664549	0.83	0.332	2	Itgb4
Tmem254a	0.662255	0.835	0.331	2	Tmem254a
Pacs2	0.661819	0.98	0.718	2	Pacs2
Trf.1	0.654351	1	0.961	2	Trf
Tubb3.1	0.65425	0.925	0.685	2	Tubb3
Acot7	0.651624	0.985	0.709	2	Acot7
Fam171b	0.641081	0.99	0.747	2	Fam171b
Sys1.1	0.638044	1	0.91	2	Sys1
Ccz1	0.63725	0.7	0.33	2	Ccz1
Csf1.1	0.633344	0.915	0.48	2	Csf1
Ldlrap1	0.631436	0.745	0.207	2	Ldlrap1
Hcn2.1	0.621652	0.955	0.56	2	Hcn2
Zdhhc20	0.620869	0.995	0.731	2	Zdhhc20
Kctd3	0.610885	0.9	0.5	2	Kctd3
Fam131b	0.610333	0.815	0.265	2	Fam131b
Gal3st1	0.604	0.985	0.645	2	Gal3st1
Myo1e	0.602011	0.81	0.295	2	Myo1e
Shisa8	0.601424	0.58	0.129	2	Shisa8
Enpp4	0.601121	0.95	0.646	2	Enpp4
Pdlim1	0.597347	0.795	0.274	2	Pdlim1
Irgm1.1	0.597043	0.7	0.488	2	Irgm1
Sema4d	0.592655	0.955	0.636	2	Sema4d
Stmn1.1	0.592069	1	0.938	2	Stmn1
Rap1gds1	0.590965	0.885	0.499	2	Rap1gds1
Sat1.1	0.589861	0.925	0.588	2	Sat1
Slc25a27	0.589527	0.845	0.387	2	Slc25a27
C4b.1	0.589001	0.91	0.722	2	C4b
St8sia5	0.586335	0.56	0.077	2	St8sia5
Rab4a	0.584503	0.77	0.287	2	Rab4a
Rasgrp3	0.584153	0.86	0.431	2	Rasgrp3
Gbp7	0.58056	0.66	0.311	2	Gbp7
Dusp3.1	0.577646	0.96	0.622	2	Dusp3
Slc5a3	0.577564	0.73	0.294	2	Slc5a3
Gjc2	0.573793	0.94	0.493	2	Gjc2
Tmsb10.1	0.573724	0.845	0.524	2	Tmsb10
Zyx	0.566288	0.775	0.235	2	Zyx
Mfsd14a	0.565406	0.93	0.519	2	Mfsd14a
Nacc2	0.554892	0.815	0.355	2	Nacc2
Sort1.1	0.553016	0.95	0.566	2	Sort1
Sass6	0.551282	0.685	0.261	2	Sass6
Tln2	0.542618	0.65	0.093	2	Tln2
2510009E07Rik	0.540029	0.68	0.21	2	2510009E07Rik
Cdc42ep2	0.538654	0.97	0.686	2	Cdc42ep2
Spg20	0.537288	0.965	0.616	2	Spg20
Inpp5f	0.537048	0.98	0.699	2	Inpp5f
Tspan9	0.534032	0.575	0.078	2	Tspan9
Cfap410	0.532166	0.59	0.096	2	Cfap410
Faah	0.527752	0.59	0.129	2	Faah
Fez1.1	0.527302	1	0.957	2	Fez1
Hhatl	0.526464	0.78	0.269	2	Hhatl
Paqr8	0.52616	0.795	0.387	2	Paqr8
2310022B05Rik	0.512436	0.8	0.376	2	2310022B05Rik
Sh3glb1	0.511497	0.995	0.875	2	Sh3glb1
Serpind1	0.511208	0.51	0.065	2	Serpind1
Bmyc	0.509548	0.93	0.559	2	Bmyc
Rida	0.50919	0.77	0.299	2	Rida
Mrps6.1	0.508921	0.925	0.497	2	Mrps6
St3gal4	0.505705	0.695	0.198	2	St3gal4
Ptms.1	0.502457	0.82	0.438	2	Ptms
Slc27a1	0.502295	0.62	0.16	2	Slc27a1
Aamdc	0.501573	0.97	0.658	2	Aamdc
Tpm3	0.501039	0.96	0.637	2	Tpm3
Pip4k2a.1	0.496406	0.99	0.858	2	Pip4k2a
Cyp27a1	0.495906	0.635	0.144	2	Cyp27a1
Apc	0.493899	0.92	0.634	2	Apc
Rftn2	0.489997	0.685	0.191	2	Rftn2
Ly6g6f	0.48637	0.56	0.11	2	Ly6g6f
Slu7.1	0.485953	0.925	0.64	2	Slu7
Rtn4.1	0.483766	1	0.977	2	Rtn4
Golga7	0.48358	0.985	0.697	2	Golga7
Pdgfa.1	0.483482	0.99	0.746	2	Pdgfa
Rell1	0.483306	0.67	0.273	2	Rell1
Ppp1r14a	0.480624	0.995	0.908	2	Ppp1r14a
Eml2.1	0.480222	0.915	0.6	2	Eml2
Sh3kbp1	0.479774	0.83	0.416	2	Sh3kbp1
Gnai1.1	0.47583	0.995	0.785	2	Gnai1
Epb41l3.1	0.47558	0.995	0.806	2	Epb41l3
Elovl7	0.475138	0.96	0.678	2	Elovl7
Tuba1a.1	0.474121	1	0.965	2	Tuba1a
Tmem178b	0.471564	0.8	0.447	2	Tmem178b
Trpc4ap	0.469865	0.925	0.562	2	Trpc4ap
Slc9a3r1	0.466785	0.6	0.152	2	Slc9a3r1
Dip2a	0.466154	0.895	0.532	2	Dip2a
S100a1.1	0.46437	0.96	0.838	2	S100a1
Sec11c.1	0.463287	1	0.969	2	Sec11c
Fah	0.460844	0.895	0.479	2	Fah
Mbnl1	0.460785	0.9	0.578	2	Mbnl1
Ap2a1	0.457566	0.875	0.689	2	Ap2a1
Ank	0.457219	0.955	0.622	2	Ank
Elavl3.1	0.456513	0.985	0.835	2	Elavl3
Prkacb.1	0.456202	0.955	0.701	2	Prkacb
Tmem63a	0.453729	0.975	0.758	2	Tmem63a
Prrg1	0.453694	0.76	0.277	2	Prrg1
Osbpl1a.1	0.452092	0.975	0.746	2	Osbpl1a
Sash1.1	0.450988	0.905	0.604	2	Sash1
Prmt2	0.450614	0.595	0.124	2	Prmt2
Adk	0.443547	0.85	0.428	2	Adk
Plp1.1	0.442781	1	0.985	2	Plp1
Gkap1	0.441501	0.915	0.593	2	Gkap1
Fntb	0.437527	0.51	0.088	2	Fntb
Nde1.1	0.436819	0.885	0.613	2	Nde1
Ephb1	0.436819	0.86	0.428	2	Ephb1
Gpx4.1	0.435145	1	0.972	2	Gpx4
Prnp	0.431951	1	0.916	2	Prnp
Reep3	0.431709	0.99	0.802	2	Reep3
Cdk5rap2	0.430124	0.725	0.314	2	Cdk5rap2
Fgf1	0.429189	0.88	0.472	2	Fgf1
Hdac11	0.422038	0.85	0.402	2	Hdac11
Itgav	0.422029	0.845	0.406	2	Itgav
Anapc11	0.421578	0.95	0.703	2	Anapc11
Stard3	0.421484	0.775	0.37	2	Stard3
Arfgef3	0.42087	0.52	0.068	2	Arfgef3
Abhd12	0.418425	0.92	0.576	2	Abhd12
Tubb4b.1	0.417081	0.935	0.617	2	Tubb4b
Galnt7	0.416101	0.825	0.441	2	Galnt7
Carns1	0.414261	0.685	0.217	2	Carns1
Smap2	0.414078	0.825	0.457	2	Smap2
Chpt1	0.412193	0.88	0.505	2	Chpt1
Ugt8a.1	0.411909	0.995	0.824	2	Ugt8a
Nrbp2	0.411708	0.865	0.418	2	Nrbp2
Prr5l	0.411392	0.915	0.578	2	Prr5l
Gpd2	0.410808	0.71	0.277	2	Gpd2
Slc24a2.1	0.410322	0.96	0.765	2	Slc24a2
Tspan5	0.40887	0.905	0.537	2	Tspan5
Sorl1	0.407334	0.745	0.328	2	Sorl1
Mvb12b	0.405121	0.79	0.388	2	Mvb12b
Tmem117	0.404493	0.595	0.186	2	Tmem117
Map1a	0.402554	0.99	0.854	2	Map1a
Atxn2	0.401567	0.88	0.432	2	Atxn2
Aif1l	0.397545	0.62	0.172	2	Aif1l
Sh3bp5	0.397489	0.905	0.557	2	Sh3bp5
Plaat3.1	0.39539	0.995	0.87	2	Plaat3
Secisbp2l.1	0.394528	1	0.842	2	Secisbp2l
Trim36	0.393458	0.59	0.172	2	Trim36
Lamp2.1	0.393396	0.99	0.908	2	Lamp2
Hivep3	0.391742	0.545	0.126	2	Hivep3
Dact3	0.390557	0.75	0.316	2	Dact3
Fam168a	0.38761	0.89	0.597	2	Fam168a
H1f2	0.386933	0.655	0.358	2	H1f2
Tspan17	0.38607	0.695	0.239	2	Tspan17
B3galnt1	0.384638	0.515	0.144	2	B3galnt1
Bace1	0.38457	0.815	0.41	2	Bace1
Aspa.1	0.380836	1	0.81	2	Aspa
Ifi27.1	0.380735	0.935	0.77	2	Ifi27
Lamp1	0.380363	1	0.973	2	Lamp1
Stxbp6	0.380278	0.9	0.548	2	Stxbp6
Insc	0.37957	0.87	0.445	2	Insc
Rgmb	0.379091	0.545	0.136	2	Rgmb
Chmp2b	0.37901	0.775	0.396	2	Chmp2b
1810058I24Rik.1	0.378292	0.94	0.719	2	1810058I24Rik
Slain1.1	0.376994	0.995	0.826	2	Slain1
Magt1	0.375333	0.925	0.633	2	Magt1
Smox	0.373748	0.67	0.312	2	Smox
Mcee	0.373733	0.905	0.537	2	Mcee
Gstm7	0.373279	0.965	0.698	2	Gstm7
Sall1	0.37217	0.565	0.138	2	Sall1
Atp9a	0.371897	0.905	0.606	2	Atp9a
Itgb5	0.371811	0.505	0.085	2	Itgb5
Acat1	0.371432	0.83	0.496	2	Acat1
Elovl5	0.370625	0.81	0.447	2	Elovl5
Rab18	0.370599	0.96	0.726	2	Rab18
Kctd13.1	0.370495	1	0.92	2	Kctd13
Adap1	0.369237	0.925	0.584	2	Adap1
Serpinb6a	0.368889	0.88	0.513	2	Serpinb6a
Abhd5	0.368404	0.78	0.378	2	Abhd5
Gss	0.367472	0.67	0.303	2	Gss
Peli2	0.365789	0.62	0.185	2	Peli2
Mlec	0.365544	0.675	0.305	2	Mlec
Plpp2	0.364567	0.73	0.326	2	Plpp2
Atp11a	0.364087	0.77	0.432	2	Atp11a
Paics	0.363789	0.95	0.66	2	Paics
Acadl	0.363329	0.85	0.455	2	Acadl
Tmem38b	0.363252	0.78	0.315	2	Tmem38b
Hmox2	0.362764	0.975	0.725	2	Hmox2
Fam98a	0.362164	0.75	0.351	2	Fam98a
Picalm	0.361968	0.945	0.69	2	Picalm
Synm	0.360535	0.88	0.46	2	Synm
Snx10	0.359548	0.61	0.294	2	Snx10
Abhd17a.1	0.358217	0.93	0.618	2	Abhd17a
Itgb8	0.356654	0.8	0.428	2	Itgb8
Me1	0.353493	0.63	0.239	2	Me1
Pik3c2b	0.353051	0.7	0.336	2	Pik3c2b
Rufy3	0.35194	0.925	0.625	2	Rufy3
Pcyt1b	0.35162	0.59	0.207	2	Pcyt1b
Ccdc13	0.350951	0.7	0.285	2	Ccdc13
Plekhb1.1	0.349912	0.995	0.81	2	Plekhb1
Adamts4	0.349721	0.82	0.464	2	Adamts4
Rcbtb1.1	0.349237	0.96	0.666	2	Rcbtb1
Sez6l2.1	0.347218	1	0.876	2	Sez6l2
Stk39	0.346817	0.815	0.455	2	Stk39
Irs2	0.345905	0.845	0.468	2	Irs2
Crip2	0.3459	0.785	0.352	2	Crip2
Lrrc8d	0.345336	0.69	0.281	2	Lrrc8d
Cdk18	0.343891	0.77	0.376	2	Cdk18
Dctn1	0.342345	0.87	0.562	2	Dctn1
Ptprf	0.340543	0.655	0.257	2	Ptprf
Vat1	0.340192	0.57	0.182	2	Vat1
Ctdspl	0.340189	0.64	0.205	2	Ctdspl
Gipc1	0.339533	0.695	0.282	2	Gipc1
Vta1	0.339107	0.87	0.529	2	Vta1
Mag	0.33854	1	0.945	2	Mag
Psat1.1	0.338401	0.995	0.864	2	Psat1
Ctnnbip1	0.337868	0.85	0.488	2	Ctnnbip1
Sh3bgrl	0.337571	0.61	0.214	2	Sh3bgrl
Cxxc5	0.337098	0.825	0.448	2	Cxxc5
Ccny	0.33602	0.71	0.324	2	Ccny
Msn	0.335791	0.63	0.241	2	Msn
Grhpr	0.33407	0.87	0.586	2	Grhpr
4931406C07Rik	0.333692	0.705	0.286	2	4931406C07Rik
Efr3b	0.333395	0.52	0.118	2	Efr3b
Stat1.1	0.33273	0.865	0.537	2	Stat1
Jakmip3	0.33266	0.69	0.342	2	Jakmip3
Plekhg1	0.332562	0.665	0.257	2	Plekhg1
Siah2	0.332458	0.6	0.189	2	Siah2
Zcchc24	0.332191	0.94	0.628	2	Zcchc24
Gpr137b	0.33205	0.505	0.078	2	Gpr137b
Ago3	0.331947	0.725	0.311	2	Ago3
Rtkn2	0.331885	0.55	0.23	2	Rtkn2
Tanc1	0.330904	0.73	0.352	2	Tanc1
Apbb2.1	0.330152	0.97	0.688	2	Apbb2
Arhgef10	0.329754	0.97	0.779	2	Arhgef10
Actn4	0.327883	0.81	0.424	2	Actn4
Actb	0.327825	1	0.996	2	Actb
Nipa1.1	0.327399	0.96	0.662	2	Nipa1
Dab2ip	0.327111	0.605	0.137	2	Dab2ip
Slc44a1	0.326869	1	0.9	2	Slc44a1
Rhou	0.326707	0.99	0.814	2	Rhou
Agps	0.326676	0.615	0.247	2	Agps
S100a16.1	0.326068	0.99	0.862	2	S100a16
Rab6b	0.3256	0.875	0.545	2	Rab6b
Rhobtb3	0.324551	0.835	0.468	2	Rhobtb3
St3gal5	0.324139	0.67	0.315	2	St3gal5
Spry2	0.32136	0.53	0.233	2	Spry2
Sv2a.1	0.320531	0.955	0.775	2	Sv2a
Pkp4	0.32052	0.69	0.378	2	Pkp4
Lrrn1	0.320488	0.935	0.652	2	Lrrn1
Kat2b.1	0.319826	0.91	0.581	2	Kat2b
Ldlrad3	0.319625	0.675	0.25	2	Ldlrad3
Ccser2	0.319054	0.64	0.247	2	Ccser2
Plekhj1	0.318698	0.79	0.403	2	Plekhj1
B3galt5	0.318654	0.875	0.578	2	B3galt5
Nt5c3.1	0.318626	0.845	0.467	2	Nt5c3
Nol3	0.317471	0.56	0.229	2	Nol3
Pja2	0.317161	0.845	0.477	2	Pja2
Dock5	0.316995	0.665	0.307	2	Dock5
Adssl1.1	0.316532	0.98	0.77	2	Adssl1
Rnf208	0.316479	0.525	0.124	2	Rnf208
Kifap3	0.315975	0.925	0.551	2	Kifap3
Mrpl58	0.315842	0.87	0.515	2	Mrpl58
Hs3st1	0.313334	0.815	0.463	2	Hs3st1
Mog.1	0.313304	1	0.912	2	Mog
Celsr2	0.312737	0.5	0.15	2	Celsr2
Adipor2.1	0.312453	1	0.847	2	Adipor2
Smim10l1	0.310516	0.805	0.476	2	Smim10l1
Pigp	0.310297	0.82	0.455	2	Pigp
Lpar1.1	0.310218	0.99	0.705	2	Lpar1
Slc20a2	0.310183	0.83	0.452	2	Slc20a2
U2af1	0.309831	0.995	0.794	2	U2af1
Stmn4.1	0.309739	1	0.931	2	Stmn4
Gstm5	0.309132	0.975	0.81	2	Gstm5
Nfib	0.308355	0.855	0.577	2	Nfib
Apbb1	0.308174	0.965	0.71	2	Apbb1
Vwa5a	0.307204	0.615	0.238	2	Vwa5a
Ifnar2	0.305158	0.605	0.287	2	Ifnar2
Osbpl7	0.305047	0.55	0.198	2	Osbpl7
Ilvbl	0.304642	0.755	0.336	2	Ilvbl
Acaca.1	0.302386	0.92	0.572	2	Acaca
Fscn1	0.301917	0.86	0.59	2	Fscn1
Tpd52	0.30178	0.895	0.593	2	Tpd52
Tspyl4	0.301521	0.905	0.566	2	Tspyl4
Samd8	0.300905	0.69	0.367	2	Samd8
Pdia4	0.300258	0.77	0.404	2	Pdia4
Sc5d.1	0.299932	0.895	0.592	2	Sc5d
Phactr1	0.299568	0.92	0.649	2	Phactr1
Snrpn	0.298778	0.885	0.537	2	Snrpn
Zfand6	0.29836	0.865	0.484	2	Zfand6
Dscaml1	0.298067	0.725	0.348	2	Dscaml1
Tmcc3.1	0.297571	0.985	0.771	2	Tmcc3
Rassf4	0.296627	0.55	0.17	2	Rassf4
Tbc1d14	0.296493	0.71	0.303	2	Tbc1d14
Nap1l5.1	0.29547	0.965	0.747	2	Nap1l5
Cdh2	0.295372	0.845	0.559	2	Cdh2
Trappc10.1	0.294536	0.95	0.676	2	Trappc10
Rab5a	0.294333	0.94	0.656	2	Rab5a
Dync1i2	0.294078	0.985	0.843	2	Dync1i2
Rps6ka5	0.293255	0.675	0.259	2	Rps6ka5
Cox19	0.2929	0.655	0.274	2	Cox19
Map7	0.292771	0.995	0.846	2	Map7
Mtmr10	0.289056	0.745	0.338	2	Mtmr10
Mad1l1	0.28885	0.525	0.195	2	Mad1l1
Rala	0.288086	0.9	0.62	2	Rala
Tax1bp1	0.288062	0.925	0.69	2	Tax1bp1
Elovl1	0.287125	0.9	0.604	2	Elovl1
Jph1	0.286228	0.67	0.327	2	Jph1
Fn3k	0.286228	0.63	0.29	2	Fn3k
Afdn	0.284223	0.695	0.328	2	Afdn
Qk.1	0.284066	1	0.985	2	Qk
Pcyox1l	0.283818	0.5	0.168	2	Pcyox1l
Epn2	0.283438	0.95	0.684	2	Epn2
Snx18	0.282011	0.53	0.186	2	Snx18
Kif1b.1	0.281292	1	0.956	2	Kif1b
Pcsk6	0.280593	0.56	0.195	2	Pcsk6
Golm2	0.279408	0.54	0.19	2	Golm2
Cdv3	0.279271	0.89	0.609	2	Cdv3
Snx9	0.279076	0.51	0.181	2	Snx9
Omg.1	0.278182	0.83	0.521	2	Omg
Mapk3	0.277611	0.96	0.721	2	Mapk3
Ppp3ca	0.275565	0.93	0.689	2	Ppp3ca
Lrp1b.1	0.272794	0.91	0.646	2	Lrp1b
Bcat1	0.27245	0.65	0.269	2	Bcat1
Cux1	0.271988	0.685	0.339	2	Cux1
Napepld	0.271331	0.56	0.185	2	Napepld
Rxylt1	0.270694	0.845	0.549	2	Rxylt1
Rab9	0.2706	0.875	0.529	2	Rab9
Zrsr1	0.269881	0.58	0.265	2	Zrsr1
Pacsin3	0.269739	0.605	0.247	2	Pacsin3
Morf4l1	0.269596	0.995	0.953	2	Morf4l1
Pam	0.269444	0.595	0.261	2	Pam
Map2k2	0.268945	0.87	0.616	2	Map2k2
Vdac3	0.268868	0.96	0.733	2	Vdac3
Abhd14a	0.26615	0.7	0.327	2	Abhd14a
S1pr5	0.265784	0.865	0.59	2	S1pr5
Smad1	0.265613	0.615	0.278	2	Smad1
Bnip3l.1	0.265234	0.995	0.899	2	Bnip3l
Ccdc28b	0.26515	0.55	0.226	2	Ccdc28b
Mycbp2	0.264754	0.865	0.577	2	Mycbp2
Zfp706	0.264544	0.99	0.836	2	Zfp706
Epdr1	0.264235	0.66	0.307	2	Epdr1
Tmem184c	0.263642	0.67	0.314	2	Tmem184c
4930402H24Rik	0.262309	0.85	0.489	2	4930402H24Rik
Fnta	0.262084	0.89	0.593	2	Fnta
Wls	0.261382	0.645	0.322	2	Wls
Rab10	0.261331	0.98	0.854	2	Rab10
Serp1	0.260743	0.81	0.419	2	Serp1
Mtx2	0.260322	0.77	0.358	2	Mtx2
Oat	0.260147	0.68	0.379	2	Oat
Scarb2.1	0.260037	0.98	0.695	2	Scarb2
Far1	0.259388	0.7	0.307	2	Far1
Ywhah	0.259138	0.78	0.451	2	Ywhah
Rprd1a	0.25908	0.58	0.262	2	Rprd1a
Tmem151a	0.259018	1	0.878	2	Tmem151a
Npc1	0.259015	0.97	0.713	2	Npc1
Mrpl51.1	0.258846	0.915	0.58	2	Mrpl51
Rtl8b	0.258646	0.785	0.451	2	Rtl8b
Fbxo21	0.257973	0.755	0.391	2	Fbxo21
Pigz	0.257542	0.845	0.532	2	Pigz
Kazn	0.256961	0.87	0.602	2	Kazn
Rtl8a	0.256741	0.81	0.501	2	Rtl8a
Rrbp1.1	0.256651	0.99	0.819	2	Rrbp1
Rnf130	0.256524	0.995	0.838	2	Rnf130
Eif1b	0.255904	0.985	0.797	2	Eif1b
Prkar1a	0.255887	0.975	0.786	2	Prkar1a
Fam171a1	0.255786	0.56	0.241	2	Fam171a1
Aldoa.1	0.254963	1	0.944	2	Aldoa
Nkain2.1	0.25438	0.735	0.43	2	Nkain2
Bsg.1	0.253917	0.985	0.834	2	Bsg
Sri	0.25377	0.875	0.614	2	Sri
Afap1	0.252618	0.51	0.215	2	Afap1
Pafah1b2	0.252299	0.895	0.649	2	Pafah1b2
Mboat1	0.251853	0.5	0.157	2	Mboat1
1190005I06Rik.1	0.251335	0.825	0.524	2	1190005I06Rik
Strn	0.250476	0.805	0.471	2	Strn
Svip	0.250455	0.725	0.392	2	Svip
Zbtb20	0.250338	0.98	0.766	2	Zbtb20
Tmem125.1	0.250201	0.845	0.573	2	Tmem125
Drap1	-0.251618	0.935	0.809	2	Drap1
Sem1	-0.251999	0.95	0.882	2	Sem1
Ndufa2	-0.254634	0.995	0.916	2	Ndufa2
Cox7c	-0.260796	0.995	0.981	2	Cox7c
Cox6c.1	-0.263902	0.99	0.977	2	Cox6c
Sgk3.1	-0.265294	0.87	0.552	2	Sgk3
Septin4.1	-0.267395	1	0.945	2	Septin4
Ncl	-0.26953	0.955	0.908	2	Ncl
Eid1.1	-0.272875	0.96	0.887	2	Eid1
Cnbp	-0.277786	0.94	0.85	2	Cnbp
Rcan2.1	-0.278081	0.965	0.836	2	Rcan2
H2az1	-0.278321	0.975	0.86	2	H2az1
Selenok	-0.278882	1	0.971	2	Selenok
Tpt1	-0.2823	1	0.999	2	Tpt1
Psmb3	-0.294588	0.945	0.834	2	Psmb3
Hepacam.1	-0.296105	0.9	0.777	2	Hepacam
Tprn	-0.311195	0.875	0.723	2	Tprn
Rpl7a.1	-0.313806	0.99	0.964	2	Rpl7a
Tmem258	-0.314042	0.995	0.924	2	Tmem258
Cavin3.1	-0.314992	0.74	0.668	2	Cavin3
Rps7	-0.31553	1	0.981	2	Rps7
Tsc22d4	-0.317497	1	0.961	2	Tsc22d4
Cox6a1	-0.319432	0.975	0.931	2	Cox6a1
Rps27l	-0.320799	0.92	0.771	2	Rps27l
Rpl10	-0.321248	1	0.959	2	Rpl10
Gde1.1	-0.32651	0.95	0.847	2	Gde1
mt-Cytb.1	-0.327749	1	0.999	2	mt-Cytb
Rpl3	-0.328565	0.99	0.976	2	Rpl3
Cd81.1	-0.329058	1	0.967	2	Cd81
Rpl4	-0.330459	0.98	0.93	2	Rpl4
Syf2	-0.334642	0.955	0.85	2	Syf2
Syt11.1	-0.340337	1	0.96	2	Syt11
Hnrnpd	-0.341246	0.715	0.633	2	Hnrnpd
mt-Co2.1	-0.344557	1	0.997	2	mt-Co2
Sub1	-0.34806	0.825	0.706	2	Sub1
Rtkn	-0.354587	0.765	0.666	2	Rtkn
Rpl36a	-0.355089	0.945	0.902	2	Rpl36a
Rpl15	-0.358007	0.995	0.977	2	Rpl15
Uba52	-0.359315	0.905	0.806	2	Uba52
Ctsl	-0.363585	0.845	0.737	2	Ctsl
Gjc3.1	-0.364775	0.915	0.805	2	Gjc3
Rpl34	-0.369551	1	0.98	2	Rpl34
Bin1.1	-0.369847	1	0.91	2	Bin1
Grina	-0.371395	0.65	0.585	2	Grina
mt-Co1.1	-0.372675	1	0.997	2	mt-Co1
Rps24	-0.376565	1	0.989	2	Rps24
Spop	-0.379137	0.76	0.695	2	Spop
Rpl6	-0.380755	0.995	0.993	2	Rpl6
Hspa5	-0.381103	0.945	0.871	2	Hspa5
Rpl35	-0.383101	0.96	0.91	2	Rpl35
Rps17	-0.38315	0.985	0.968	2	Rps17
Zfp638.1	-0.385475	0.735	0.654	2	Zfp638
Pcsk1n.1	-0.389679	0.815	0.774	2	Pcsk1n
Eef1a1	-0.390299	1	0.996	2	Eef1a1
Rps11	-0.390365	1	0.973	2	Rps11
H3f3b.1	-0.390582	1	0.987	2	H3f3b
mt-Atp6.1	-0.391776	1	1	2	mt-Atp6
Phlda3	-0.39405	0.875	0.807	2	Phlda3
Rps6	-0.39669	0.995	0.965	2	Rps6
Hsd17b12.1	-0.40007	0.86	0.745	2	Hsd17b12
Shisa4	-0.40025	0.945	0.886	2	Shisa4
Rpl35a	-0.402517	1	0.976	2	Rpl35a
Fbxo2.1	-0.402772	0.79	0.681	2	Fbxo2
Dbi.1	-0.411516	1	0.988	2	Dbi
Rps9	-0.416355	1	0.988	2	Rps9
Rpl7	-0.418276	0.995	0.981	2	Rpl7
Rpl31	-0.421072	0.95	0.898	2	Rpl31
Cadm1	-0.421563	0.515	0.491	2	Cadm1
Anks1b	-0.421749	0.775	0.765	2	Anks1b
Jund	-0.423143	0.995	0.971	2	Jund
Rps12	-0.423729	1	0.976	2	Rps12
Rpl11	-0.426856	1	0.989	2	Rpl11
Rpl5	-0.427483	0.995	0.948	2	Rpl5
Rpl28	-0.43231	1	0.985	2	Rpl28
Eif5b	-0.432363	0.835	0.69	2	Eif5b
Timp2.1	-0.432585	0.655	0.585	2	Timp2
Rps15a	-0.434321	1	0.98	2	Rps15a
Daam1.1	-0.434386	0.675	0.625	2	Daam1
Myo18a	-0.436309	0.59	0.564	2	Myo18a
Nudt4	-0.436783	0.835	0.737	2	Nudt4
Hnrnpa1	-0.437621	0.785	0.686	2	Hnrnpa1
Rpl23a	-0.438005	0.97	0.915	2	Rpl23a
Hsp90aa1.1	-0.438606	1	0.987	2	Hsp90aa1
Rpl26	-0.440172	1	0.976	2	Rpl26
Rpl27a	-0.445532	0.995	0.988	2	Rpl27a
Fbxo7.1	-0.447822	0.69	0.638	2	Fbxo7
Cirbp.1	-0.453479	0.735	0.641	2	Cirbp
Fbxl5.1	-0.454319	0.595	0.586	2	Fbxl5
Rps20	-0.454808	1	0.98	2	Rps20
Prdx5	-0.454882	0.87	0.738	2	Prdx5
Rpl18a	-0.460196	1	0.984	2	Rpl18a
Erbin.1	-0.461763	0.9	0.805	2	Erbin
Mif	-0.462144	0.93	0.868	2	Mif
Rps3.1	-0.462654	0.995	0.981	2	Rps3
Rpl30	-0.469416	1	0.989	2	Rpl30
Rps13.1	-0.469626	1	0.979	2	Rps13
Kdm4a.1	-0.470507	0.555	0.504	2	Kdm4a
Rps4x	-0.471114	0.995	0.975	2	Rps4x
Arl4d	-0.478596	0.605	0.596	2	Arl4d
mt-Nd2.1	-0.479092	1	0.993	2	mt-Nd2
Rps26	-0.48016	0.995	0.975	2	Rps26
Creb5.1	-0.481735	0.695	0.664	2	Creb5
mt-Nd1.1	-0.485517	1	0.993	2	mt-Nd1
Rpl22	-0.486541	0.99	0.945	2	Rpl22
Rpl21	-0.488346	1	0.983	2	Rpl21
Rpl17	-0.49452	1	0.977	2	Rpl17
Rps23	-0.49992	1	0.981	2	Rps23
Ptn.1	-0.503158	0.93	0.815	2	Ptn
Plpp3	-0.504434	0.555	0.513	2	Plpp3
Spock1	-0.505226	0.615	0.656	2	Spock1
Csrp1.1	-0.505973	1	0.945	2	Csrp1
Sox2.1	-0.507607	0.525	0.507	2	Sox2
Rpl36	-0.508607	0.995	0.96	2	Rpl36
Bcas1	-0.511006	0.875	0.778	2	Bcas1
Rpl37	-0.511044	1	0.987	2	Rpl37
Rpl19	-0.514623	0.995	0.993	2	Rpl19
Rps25	-0.515061	0.99	0.96	2	Rps25
Rpl41	-0.525882	1	0.993	2	Rpl41
Rps14	-0.529238	1	0.985	2	Rps14
Fau	-0.530887	1	0.995	2	Fau
Rps16	-0.533387	0.99	0.987	2	Rps16
Rpl18	-0.533676	1	0.985	2	Rpl18
Psap	-0.536252	0.99	0.951	2	Psap
H3f3a	-0.537094	1	0.992	2	H3f3a
Rps27a	-0.537847	1	0.995	2	Rps27a
Ifrd1.1	-0.541256	0.73	0.676	2	Ifrd1
Rps21	-0.544682	1	0.985	2	Rps21
Rpl14	-0.548136	1	0.973	2	Rpl14
Rps2.1	-0.54995	1	0.973	2	Rps2
Rack1	-0.550057	0.975	0.934	2	Rack1
Rps15	-0.551433	0.985	0.971	2	Rps15
Rpl27.1	-0.551457	1	0.975	2	Rpl27
Rpl9	-0.554476	1	0.983	2	Rpl9
Rps27	-0.555934	0.995	0.98	2	Rps27
Rps29	-0.556886	0.995	0.993	2	Rps29
Rpl29	-0.561073	0.97	0.948	2	Rpl29
Rpl32	-0.562743	1	0.989	2	Rpl32
Rpl10a	-0.565807	0.945	0.879	2	Rpl10a
Rpl39	-0.56597	1	0.973	2	Rpl39
Rpl24	-0.566194	1	0.988	2	Rpl24
Plekha1	-0.56666	0.79	0.707	2	Plekha1
Add3.1	-0.568598	0.73	0.721	2	Add3
Klf13	-0.573981	0.995	0.91	2	Klf13
Rpl23	-0.575456	0.995	0.993	2	Rpl23
Ddit4	-0.577133	0.725	0.713	2	Ddit4
Mat2a.1	-0.577468	0.965	0.896	2	Mat2a
Rplp1	-0.582925	1	0.988	2	Rplp1
Rps8	-0.585849	1	0.995	2	Rps8
Paxx	-0.589578	0.69	0.656	2	Paxx
Rpl38	-0.596854	1	0.981	2	Rpl38
Kcna1	-0.604467	0.88	0.875	2	Kcna1
H2aj	-0.608949	0.965	0.91	2	H2aj
Sema6d.1	-0.610414	0.55	0.539	2	Sema6d
Pim3	-0.616286	0.875	0.847	2	Pim3
Rpl37a	-0.619655	0.99	0.976	2	Rpl37a
Gstp1.1	-0.620518	0.985	0.842	2	Gstp1
Rps3a1	-0.621898	1	0.985	2	Rps3a1
Ss18l2	-0.622942	0.815	0.749	2	Ss18l2
Rpl8	-0.624411	1	0.983	2	Rpl8
Rpsa	-0.631041	1	0.985	2	Rpsa
Desi1.1	-0.631859	0.86	0.753	2	Desi1
Lgi3.1	-0.634312	0.77	0.765	2	Lgi3
Arrdc2	-0.636362	0.65	0.665	2	Arrdc2
Rplp2	-0.636797	0.99	0.965	2	Rplp2
S100a6.1	-0.637218	0.83	0.533	2	S100a6
Arap2	-0.652982	0.79	0.769	2	Arap2
Rplp0.1	-0.65382	0.995	0.973	2	Rplp0
Plin4.1	-0.653986	0.465	0.536	2	Plin4
Sgk1.1	-0.662298	1	0.919	2	Sgk1
Rpl12.1	-0.663783	0.96	0.919	2	Rpl12
Rps18	-0.666706	1	0.973	2	Rps18
Htra1	-0.669432	0.88	0.866	2	Htra1
Mal.1	-0.678216	1	0.957	2	Mal
Acsl3	-0.686072	0.695	0.642	2	Acsl3
Ppp1r2	-0.690496	0.7	0.609	2	Ppp1r2
Camk2n1	-0.691451	0.365	0.549	2	Camk2n1
Tmod2.1	-0.707145	0.91	0.882	2	Tmod2
Sema6a.1	-0.711042	0.435	0.634	2	Sema6a
Klf9.1	-0.712364	0.955	0.872	2	Klf9
Rpl13	-0.714211	1	0.992	2	Rpl13
Rps5	-0.720999	0.995	0.979	2	Rps5
Cdr2l	-0.722446	0.365	0.503	2	Cdr2l
Olig2.1	-0.729687	0.395	0.555	2	Olig2
Rps28.1	-0.739628	0.99	0.96	2	Rps28
Olig1.1	-0.744999	0.87	0.847	2	Olig1
Ccp110.1	-0.75296	0.535	0.629	2	Ccp110
Insig1	-0.756259	0.69	0.664	2	Insig1
Rps19	-0.764798	0.995	0.957	2	Rps19
Qdpr.1	-0.769751	0.99	0.935	2	Qdpr
Ptma.1	-0.786016	1	0.996	2	Ptma
Arpc1a.1	-0.793364	0.995	0.948	2	Arpc1a
Pex5l	-0.810721	0.95	0.896	2	Pex5l
Jun	-0.831488	0.67	0.621	2	Jun
Nfkbia	-0.877507	0.845	0.828	2	Nfkbia
Rbm3.1	-0.880947	0.75	0.681	2	Rbm3
Grb14.1	-0.901789	0.97	0.842	2	Grb14
Clmn.1	-0.981046	0.525	0.642	2	Clmn
Tspan2.1	-0.999668	0.99	0.919	2	Tspan2
Slc38a2	-1.03655	0.965	0.91	2	Slc38a2
Cd63.1	-1.04328	0.775	0.904	2	Cd63
Ckb.1	-1.06519	0.99	0.948	2	Ckb
Cstb.1	-1.07856	0.885	0.806	2	Cstb
Cd9	-1.4689	0.89	0.939	2	Cd9
Phactr3	-1.48003	0.54	0.753	2	Phactr3
Cdkn1a.1	-1.56186	0.56	0.608	2	Cdkn1a
Il33.1	-1.62032	0.39	0.801	2	Il33
Apoe	-2.05531	0.61	0.891	2	Apoe
Mt1.1	-2.48275	0.96	0.969	2	Mt1
Opalin.1	-2.52579	0.125	0.693	2	Opalin
Ptgds.1	-4.2253	0.92	0.927	2	Ptgds
Igtp.1	1.55551	0.922	0.459	3	Igtp
Stat1.2	1.26348	0.902	0.549	3	Stat1
B2m.1	1.11917	1	0.874	3	B2m
Opalin.2	1.10125	0.915	0.508	3	Opalin
Ifi27.2	1.04694	0.948	0.777	3	Ifi27
Psmb8.1	1.04495	0.935	0.519	3	Psmb8
Ptgds.2	0.994705	1	0.911	3	Ptgds
H2-D1.1	0.976952	1	0.904	3	H2-D1
Irgm2	0.940888	0.706	0.324	3	Irgm2
C4b.2	0.902725	0.974	0.721	3	C4b
H2-K1.1	0.861352	1	0.851	3	H2-K1
Bst2.1	0.848837	0.85	0.481	3	Bst2
Ptn.2	0.827225	1	0.809	3	Ptn
Psmb9.1	0.826344	0.81	0.362	3	Psmb9
Qdpr.2	0.819973	1	0.936	3	Qdpr
H2-Q4.1	0.807398	0.81	0.489	3	H2-Q4
Gstp1.2	0.798531	1	0.847	3	Gstp1
Mal.2	0.749145	1	0.96	3	Mal
Grb14.2	0.746027	0.974	0.849	3	Grb14
Ckb.2	0.738899	1	0.949	3	Ckb
H2-Q7.1	0.731595	0.725	0.374	3	H2-Q7
Tap2.1	0.70079	0.725	0.389	3	Tap2
H2-T23.1	0.693284	0.961	0.578	3	H2-T23
Cd274	0.677646	0.51	0.235	3	Cd274
Tap1.1	0.675131	0.771	0.393	3	Tap1
Tspan2.2	0.661793	0.993	0.922	3	Tspan2
Selenom	0.629651	1	0.907	3	Selenom
Desi1.2	0.621045	0.961	0.74	3	Desi1
Pcsk1n.2	0.617516	0.967	0.747	3	Pcsk1n
Csrp1.2	0.614478	1	0.949	3	Csrp1
Bin1.2	0.61382	0.993	0.916	3	Bin1
Olig1.2	0.608888	0.967	0.83	3	Olig1
Irgm1.2	0.607491	0.843	0.473	3	Irgm1
Gjc3.2	0.59294	0.954	0.804	3	Gjc3
Cd81.2	0.586938	1	0.969	3	Cd81
Septin4.2	0.582601	0.993	0.95	3	Septin4
Gamt.1	0.576699	0.791	0.563	3	Gamt
Dbi.2	0.573142	1	0.989	3	Dbi
Aspa.2	0.56707	1	0.821	3	Aspa
Xaf1.1	0.567029	0.895	0.68	3	Xaf1
Cryab.1	0.566272	1	0.985	3	Cryab
Kcna2	0.543206	0.516	0.205	3	Kcna2
Enpp2.1	0.538273	1	0.91	3	Enpp2
Pde8a.1	0.535641	0.824	0.605	3	Pde8a
Sgk1.2	0.53255	1	0.924	3	Sgk1
Psme2.1	0.530826	0.778	0.553	3	Psme2
Creb5.2	0.528148	0.824	0.641	3	Creb5
Cd9.1	0.525225	1	0.915	3	Cd9
Il33.2	0.523043	0.993	0.661	3	Il33
Ttll7.1	0.508881	0.987	0.87	3	Ttll7
Ccp110.2	0.504905	0.837	0.566	3	Ccp110
Clmn.2	0.498565	0.817	0.579	3	Clmn
Hhip.1	0.496355	0.667	0.447	3	Hhip
Mapt.1	0.492732	0.974	0.884	3	Mapt
Gpr37.1	0.492657	0.987	0.875	3	Gpr37
Jph4	0.491636	0.529	0.203	3	Jph4
Reep5.1	0.49005	0.993	0.935	3	Reep5
Foxn3.1	0.486571	0.941	0.866	3	Foxn3
Cnp.1	0.480322	1	0.969	3	Cnp
Sema6d.2	0.476854	0.732	0.504	3	Sema6d
Rtp4	0.472028	0.529	0.315	3	Rtp4
Fbxo7.2	0.471376	0.81	0.618	3	Fbxo7
Lap3	0.467661	0.974	0.86	3	Lap3
Apoe.1	0.466706	0.961	0.807	3	Apoe
Chn2.1	0.465637	0.797	0.587	3	Chn2
Olig2.2	0.452553	0.739	0.479	3	Olig2
Evi2a.1	0.448712	0.974	0.815	3	Evi2a
Timp2.2	0.447442	0.824	0.557	3	Timp2
Ttyh1.1	0.441342	0.582	0.327	3	Ttyh1
Lgi3.2	0.439261	0.915	0.737	3	Lgi3
Ptprd.1	0.434693	0.967	0.859	3	Ptprd
Anks1b.1	0.425535	0.928	0.736	3	Anks1b
Tmod2.2	0.425084	1	0.866	3	Tmod2
Omg.2	0.417891	0.797	0.546	3	Omg
Atp8a1.1	0.417638	0.961	0.798	3	Atp8a1
Septin7.1	0.414954	1	0.96	3	Septin7
Add1.1	0.412658	0.824	0.711	3	Add1
Glul	0.40855	1	0.946	3	Glul
Erbin.2	0.40741	0.922	0.806	3	Erbin
Arpc1a.2	0.395287	1	0.95	3	Arpc1a
Gprc5b.1	0.394	0.915	0.751	3	Gprc5b
Ninj2	0.392544	0.562	0.365	3	Ninj2
H2-T22	0.385837	0.601	0.379	3	H2-T22
Ptma.2	0.385368	1	0.996	3	Ptma
Oxct1	0.38433	0.654	0.462	3	Oxct1
Plp1.2	0.384228	1	0.986	3	Plp1
Ppp1r16b.1	0.374034	0.98	0.877	3	Ppp1r16b
Ano4.1	0.370104	0.582	0.329	3	Ano4
Arap2.1	0.363201	0.876	0.753	3	Arap2
5031439G07Rik.1	0.361065	0.915	0.772	3	5031439G07Rik
Vmp1.1	0.359625	0.993	0.897	3	Vmp1
Dpysl2.1	0.355011	0.993	0.926	3	Dpysl2
Tmem229a.1	0.350473	0.876	0.683	3	Tmem229a
Tnni1	0.34863	0.614	0.433	3	Tnni1
Pllp	0.343887	0.967	0.886	3	Pllp
Gpm6b.1	0.340868	0.993	0.965	3	Gpm6b
Pigz.1	0.340663	0.706	0.577	3	Pigz
Smco3.1	0.335159	0.725	0.534	3	Smco3
Prr18.1	0.33439	0.68	0.522	3	Prr18
Psmb10.1	0.330316	0.634	0.395	3	Psmb10
1190005I06Rik.2	0.330207	0.693	0.567	3	1190005I06Rik
Faim2.1	0.329735	0.699	0.539	3	Faim2
Ppp1r14a.1	0.328232	1	0.912	3	Ppp1r14a
Dusp3.2	0.326348	0.804	0.672	3	Dusp3
Fbxo2.2	0.326346	0.83	0.68	3	Fbxo2
Rnf7	0.325823	1	0.972	3	Rnf7
Ttyh2.1	0.323549	0.895	0.728	3	Ttyh2
Hebp1.1	0.32266	0.562	0.324	3	Hebp1
Trim59.1	0.322263	0.869	0.741	3	Trim59
Sez6l2.2	0.322119	0.993	0.885	3	Sez6l2
Trp53bp2.1	0.320608	0.641	0.487	3	Trp53bp2
Nmral1.1	0.319257	0.817	0.712	3	Nmral1
Hepacam.2	0.317875	0.869	0.79	3	Hepacam
App.1	0.316518	0.987	0.967	3	App
Htra1.1	0.313457	0.987	0.846	3	Htra1
Cavin3.2	0.313381	0.797	0.661	3	Cavin3
Edil3.1	0.307841	0.98	0.9	3	Edil3
Slc48a1.1	0.30447	0.961	0.854	3	Slc48a1
Gabbr1	0.302393	0.869	0.782	3	Gabbr1
Rsrp1	0.301063	0.98	0.911	3	Rsrp1
Thra.1	0.30095	0.961	0.859	3	Thra
Psme1.1	0.300852	0.739	0.466	3	Psme1
Stmn1.2	0.299809	1	0.941	3	Stmn1
Eid1.2	0.299764	0.974	0.889	3	Eid1
Hsp90ab1.1	0.298957	0.993	0.997	3	Hsp90ab1
Tle5	0.297115	0.935	0.845	3	Tle5
Pls1.1	0.296341	0.725	0.643	3	Pls1
Lzts2	0.295359	0.882	0.738	3	Lzts2
Cldn11.1	0.294941	1	0.947	3	Cldn11
Phgdh.1	0.294496	0.987	0.856	3	Phgdh
Pik3r1.1	0.292231	0.863	0.757	3	Pik3r1
Plekha1.1	0.291132	0.81	0.708	3	Plekha1
Wipi1	0.291001	0.686	0.617	3	Wipi1
Cdk5	0.289899	0.673	0.492	3	Cdk5
Kif13b	0.289786	0.771	0.645	3	Kif13b
H2aj.1	0.288046	0.967	0.912	3	H2aj
Dnajc19	0.285015	0.863	0.745	3	Dnajc19
Rnf13.1	0.282913	0.987	0.926	3	Rnf13
Tmbim6	0.282128	0.98	0.94	3	Tmbim6
Mog.2	0.280985	0.993	0.919	3	Mog
Tmem258.1	0.280681	0.993	0.929	3	Tmem258
Dhrs7	0.278417	0.699	0.542	3	Dhrs7
Phldb1.1	0.277577	0.824	0.721	3	Phldb1
Cox7a2	0.277075	1	0.945	3	Cox7a2
Lpgat1	0.275041	0.752	0.713	3	Lpgat1
Irf9	0.275021	0.51	0.38	3	Irf9
Adamtsl1	0.272914	0.562	0.289	3	Adamtsl1
Cers2.1	0.269631	0.98	0.92	3	Cers2
Gbp7.1	0.269297	0.621	0.339	3	Gbp7
Cilk1	0.268503	0.503	0.38	3	Cilk1
Cmtm5.2	0.267884	0.967	0.815	3	Cmtm5
Cystm1	0.267828	0.993	0.896	3	Cystm1
Erbb3.1	0.266743	0.556	0.407	3	Erbb3
Rcan2.2	0.262948	0.954	0.846	3	Rcan2
Zfp365	0.261414	0.562	0.452	3	Zfp365
Sh3bgrl3.1	0.261056	0.941	0.891	3	Sh3bgrl3
Ppt1	0.261009	0.582	0.476	3	Ppt1
Jam3	0.260787	0.941	0.854	3	Jam3
Nkain1	0.257903	0.595	0.478	3	Nkain1
Slc50a1	0.25724	0.824	0.697	3	Slc50a1
Cdc42bpa.1	0.257229	0.974	0.874	3	Cdc42bpa
St18.1	0.256052	0.569	0.496	3	St18
Tmem98	0.254063	0.588	0.498	3	Tmem98
Plaat3.2	0.253168	0.993	0.877	3	Plaat3
Snx30.1	0.253056	0.601	0.513	3	Snx30
Mapk8ip1.1	0.252976	0.954	0.857	3	Mapk8ip1
Carhsp1	0.252672	0.922	0.817	3	Carhsp1
Cyth1	0.252242	0.673	0.578	3	Cyth1
Fbxl5.2	0.250854	0.699	0.567	3	Fbxl5
Degs1.1	0.250834	0.928	0.844	3	Degs1
Man1a2	0.250473	0.516	0.385	3	Man1a2
Rps7.1	-0.250613	0.987	0.985	3	Rps7
Arpc2	-0.251536	0.667	0.715	3	Arpc2
Mrps6.2	-0.253102	0.503	0.603	3	Mrps6
Rpl17.1	-0.256052	0.987	0.981	3	Rpl17
Lsm12	-0.259705	0.438	0.561	3	Lsm12
Cct2	-0.260154	0.791	0.819	3	Cct2
Rexo2	-0.261925	0.778	0.814	3	Rexo2
Dnaja2	-0.262855	0.66	0.715	3	Dnaja2
Slc25a27.1	-0.262924	0.386	0.502	3	Slc25a27
Rps6.1	-0.263735	0.993	0.967	3	Rps6
Map4	-0.263887	0.373	0.511	3	Map4
Irs2.1	-0.265575	0.458	0.564	3	Irs2
Agpat4	-0.265865	0.961	0.94	3	Agpat4
Rpl6.1	-0.26709	1	0.992	3	Rpl6
Ctnnbip1.1	-0.267687	0.444	0.587	3	Ctnnbip1
Trpc4ap.1	-0.267819	0.516	0.662	3	Trpc4ap
Rpl3.1	-0.268985	0.98	0.979	3	Rpl3
Itgav.1	-0.269664	0.386	0.519	3	Itgav
AI413582.1	-0.273919	0.464	0.556	3	AI413582
Top1	-0.274602	0.68	0.731	3	Top1
Ywhab	-0.274866	0.791	0.841	3	Ywhab
Rpl23.1	-0.27654	1	0.992	3	Rpl23
Mpp5	-0.277557	0.484	0.627	3	Mpp5
Mrpl51.2	-0.279175	0.582	0.663	3	Mrpl51
Fsd1l	-0.279994	0.379	0.509	3	Fsd1l
Wasf2	-0.28046	0.51	0.636	3	Wasf2
Dync1i2.1	-0.281742	0.85	0.877	3	Dync1i2
Cox5a.1	-0.282093	0.869	0.897	3	Cox5a
Actn4.1	-0.282675	0.425	0.521	3	Actn4
Rps16.1	-0.285312	0.993	0.986	3	Rps16
Eef1g	-0.286488	0.745	0.781	3	Eef1g
0610012G03Rik	-0.286706	0.464	0.596	3	0610012G03Rik
Rnh1	-0.286827	0.471	0.573	3	Rnh1
Zfand5.1	-0.289924	0.647	0.743	3	Zfand5
Tmbim1	-0.292189	0.765	0.84	3	Tmbim1
Rpl32.1	-0.292321	0.987	0.992	3	Rpl32
Bcl2l1.1	-0.294952	0.739	0.78	3	Bcl2l1
Serbp1	-0.297367	0.856	0.889	3	Serbp1
Rpl38.1	-0.298978	0.98	0.986	3	Rpl38
Rpl41.1	-0.302371	0.993	0.995	3	Rpl41
Slc25a5.1	-0.305327	0.699	0.77	3	Slc25a5
Atp6v1g1.1	-0.306544	0.948	0.936	3	Atp6v1g1
Eef1b2	-0.310781	0.908	0.931	3	Eef1b2
Rps20.1	-0.312595	0.987	0.984	3	Rps20
Twf1	-0.317241	0.529	0.637	3	Twf1
Nek7	-0.321401	0.438	0.543	3	Nek7
Ssr4	-0.321941	0.81	0.859	3	Ssr4
Atp9a.1	-0.323185	0.627	0.677	3	Atp9a
Etnk1	-0.33319	0.484	0.655	3	Etnk1
Dctn4.2	-0.334442	0.693	0.711	3	Dctn4
Zdhhc20.1	-0.334908	0.817	0.781	3	Zdhhc20
Ptpra.1	-0.336558	0.712	0.802	3	Ptpra
Rps15a.1	-0.338028	0.974	0.986	3	Rps15a
Rpl23a.1	-0.339529	0.935	0.925	3	Rpl23a
Sash1.2	-0.339728	0.582	0.683	3	Sash1
Pkm.1	-0.341985	0.66	0.721	3	Pkm
Higd1a.1	-0.343557	0.686	0.76	3	Higd1a
Snx1	-0.343834	0.66	0.728	3	Snx1
Adssl1.2	-0.353153	0.83	0.811	3	Adssl1
Eif4a1.1	-0.353297	0.915	0.929	3	Eif4a1
Scd1	-0.357252	0.588	0.656	3	Scd1
Rps3.2	-0.357406	0.993	0.982	3	Rps3
Stxbp3.1	-0.359697	0.797	0.811	3	Stxbp3
Rpl18.1	-0.364719	0.993	0.987	3	Rpl18
Adipor2.2	-0.365175	0.869	0.881	3	Adipor2
Atp6v0e.1	-0.368537	0.778	0.822	3	Atp6v0e
S100a13.1	-0.370475	0.876	0.867	3	S100a13
Sc5d.2	-0.376345	0.556	0.675	3	Sc5d
Rpsa.1	-0.380917	0.993	0.987	3	Rpsa
Ptms.2	-0.382112	0.392	0.542	3	Ptms
Rps18.1	-0.393665	0.987	0.977	3	Rps18
Cyp51.1	-0.395288	0.497	0.605	3	Cyp51
Cab39l.1	-0.402511	0.392	0.537	3	Cab39l
Sccpdh.1	-0.40364	0.784	0.733	3	Sccpdh
Rps28.2	-0.403806	0.987	0.962	3	Rps28
Rplp0.2	-0.405548	0.993	0.975	3	Rplp0
Sh3bp5.1	-0.408245	0.503	0.655	3	Sh3bp5
Rps12.1	-0.409016	0.967	0.984	3	Rps12
Gjb1.2	-0.409085	0.824	0.763	3	Gjb1
Ctsd.1	-0.421527	0.732	0.771	3	Ctsd
Cpox.1	-0.431768	0.856	0.824	3	Cpox
Tubb4b.2	-0.436049	0.608	0.698	3	Tubb4b
Rps2.2	-0.436957	0.987	0.977	3	Rps2
Errfi1.1	-0.437019	0.438	0.596	3	Errfi1
Rps19.1	-0.437633	0.941	0.97	3	Rps19
Ciao2a.1	-0.448192	0.392	0.61	3	Ciao2a
Rpl10a.1	-0.456046	0.804	0.91	3	Rpl10a
Synm.1	-0.463696	0.399	0.577	3	Synm
Fmnl2.1	-0.465894	0.536	0.646	3	Fmnl2
Cpd.1	-0.469111	0.667	0.717	3	Cpd
Slco3a1.1	-0.472248	0.569	0.635	3	Slco3a1
Iqsec1.2	-0.475352	0.503	0.64	3	Iqsec1
Ddit3.1	-0.476221	0.386	0.522	3	Ddit3
Map1lc3a.1	-0.480307	0.817	0.805	3	Map1lc3a
Tuba1b.1	-0.488308	0.497	0.667	3	Tuba1b
Serpinb1a.1	-0.495433	0.366	0.532	3	Serpinb1a
Pcyt2.1	-0.502629	0.497	0.657	3	Pcyt2
Gapdh.2	-0.520991	0.993	0.961	3	Gapdh
Ctsb.1	-0.522278	0.83	0.866	3	Ctsb
Tmsb4x.2	-0.530577	1	1	3	Tmsb4x
Pfn2	-0.535972	0.549	0.66	3	Pfn2
S100a1.2	-0.538046	0.83	0.87	3	S100a1
Trf.2	-0.540015	1	0.964	3	Trf
Msmo1.1	-0.546838	0.595	0.727	3	Msmo1
Sypl.1	-0.562802	0.876	0.819	3	Sypl
Rbm3.2	-0.566923	0.588	0.716	3	Rbm3
Tubb5.1	-0.570064	0.503	0.626	3	Tubb5
Endod1.1	-0.573109	0.889	0.895	3	Endod1
Sys1.2	-0.579882	0.935	0.927	3	Sys1
Ndst1.1	-0.579988	0.386	0.567	3	Ndst1
Apbb2.2	-0.591214	0.614	0.772	3	Apbb2
Marcksl1.2	-0.594847	0.386	0.544	3	Marcksl1
Actg1.1	-0.598331	0.908	0.907	3	Actg1
Gltp.2	-0.5995	0.869	0.869	3	Gltp
Rpl12.2	-0.600401	0.902	0.932	3	Rpl12
Lmna.1	-0.604632	0.425	0.597	3	Lmna
Acaca.2	-0.614506	0.497	0.673	3	Acaca
Sat1.2	-0.620335	0.542	0.681	3	Sat1
Anln.1	-0.630704	0.876	0.804	3	Anln
Pdgfa.2	-0.638792	0.739	0.809	3	Pdgfa
Gsn.2	-0.644952	0.843	0.872	3	Gsn
Pmp22.2	-0.685414	0.529	0.589	3	Pmp22
Sgk3.2	-0.773458	0.431	0.655	3	Sgk3
Hmgcs1.1	-0.835002	0.673	0.753	3	Hmgcs1
Cstb.2	-0.836371	0.837	0.82	3	Cstb
Map1b.2	-0.90878	0.333	0.534	3	Map1b
Fabp5.1	-1.02746	0.85	0.915	3	Fabp5
Cdkn1a.2	-1.15594	0.516	0.613	3	Cdkn1a
Selenop.2	-1.16054	0.621	0.725	3	Selenop
Anxa5.2	-1.35263	0.242	0.511	3	Anxa5
Gpd1.1	-1.46662	0.451	0.653	3	Gpd1
S100a6.2	-1.69106	0.438	0.626	3	S100a6
Serpina3n.2	-2.11892	0.34	0.612	3	Serpina3n
Apod.2	-2.21438	0.993	0.977	3	Apod
Klk6.2	-3.17839	0.124	0.529	3	Klk6
Tma16	2.23043	0.735	0.352	4	Tma16
Phactr3.1	1.90562	0.982	0.671	4	Phactr3
Cdkn1a.3	1.89176	1	0.544	4	Cdkn1a
Sgk3.3	1.65775	0.929	0.577	4	Sgk3
Ptgds.3	1.50765	1	0.915	4	Ptgds
Pla2g3	1.33191	0.717	0.186	4	Pla2g3
Insig1.1	1.32283	0.912	0.636	4	Insig1
Cab39l.2	1.31015	0.832	0.471	4	Cab39l
Mfsd2a	1.28677	0.885	0.281	4	Mfsd2a
Arrdc2.1	1.26155	1	0.616	4	Arrdc2
Pnpla2.1	1.25593	0.903	0.539	4	Pnpla2
Apoe.2	1.24478	0.903	0.822	4	Apoe
Tspan4	1.21074	0.664	0.25	4	Tspan4
Pdxk.1	1.05243	0.832	0.415	4	Pdxk
Stxbp3.2	1.04629	0.938	0.791	4	Stxbp3
Acaca.3	1.04128	0.894	0.611	4	Acaca
Itgad	1.01135	0.85	0.375	4	Itgad
Apod.3	1.00965	0.991	0.979	4	Apod
Ddit4.1	0.993601	0.947	0.684	4	Ddit4
Plin4.2	0.958791	0.858	0.476	4	Plin4
Cdr2l.1	0.952331	0.735	0.439	4	Cdr2l
Adipor2.3	0.942341	0.982	0.865	4	Adipor2
Slc6a1	0.904134	0.903	0.608	4	Slc6a1
Pex5l.1	0.899505	0.991	0.896	4	Pex5l
Slc38a2.1	0.887433	1	0.911	4	Slc38a2
Cirbp.2	0.884009	0.965	0.62	4	Cirbp
Rbm3.3	0.882719	0.982	0.657	4	Rbm3
Nap1l5.2	0.874185	0.858	0.784	4	Nap1l5
Klf9.2	0.859725	0.991	0.876	4	Klf9
Mid1ip1	0.852318	0.938	0.816	4	Mid1ip1
Paxx.1	0.833974	0.876	0.634	4	Paxx
Nfkbia.1	0.804743	0.965	0.814	4	Nfkbia
Tmem50a	0.803521	0.982	0.888	4	Tmem50a
Ddc	0.797239	0.699	0.54	4	Ddc
Wnt3	0.797033	0.752	0.381	4	Wnt3
Fkbp5	0.794935	0.85	0.378	4	Fkbp5
Zfand4	0.790631	0.602	0.166	4	Zfand4
Ogdhl	0.782111	0.575	0.272	4	Ogdhl
Spock1.1	0.780528	0.841	0.621	4	Spock1
Mast3	0.778673	0.929	0.707	4	Mast3
Glul.1	0.749283	0.991	0.95	4	Glul
Acss2	0.746474	0.602	0.396	4	Acss2
Kcna1.1	0.744228	0.991	0.861	4	Kcna1
Fsd1l.1	0.735721	0.743	0.454	4	Fsd1l
Ttyh1.2	0.735484	0.531	0.346	4	Ttyh1
Map7d2	0.735094	0.85	0.662	4	Map7d2
Kndc1	0.728937	0.867	0.698	4	Kndc1
Zbtb16	0.717745	0.673	0.344	4	Zbtb16
Car14	0.708577	0.885	0.728	4	Car14
Ptpra.2	0.705937	0.956	0.765	4	Ptpra
Atp6v1g1.2	0.693104	0.982	0.932	4	Atp6v1g1
Klf13.1	0.691178	1	0.918	4	Klf13
Arhgap21	0.677945	0.752	0.517	4	Arhgap21
Apbb2.3	0.675156	0.903	0.726	4	Apbb2
Heg1	0.670589	0.549	0.338	4	Heg1
Jund.1	0.668705	1	0.973	4	Jund
Washc2	0.646098	0.92	0.738	4	Washc2
Ciao2a.2	0.64577	0.796	0.545	4	Ciao2a
Bnip3.1	0.643962	0.743	0.51	4	Bnip3
Fdps.1	0.637301	0.876	0.701	4	Fdps
Tsc22d4.1	0.634172	1	0.965	4	Tsc22d4
Erlin2	0.618671	0.673	0.431	4	Erlin2
Aldh6a1	0.613237	0.814	0.563	4	Aldh6a1
Higd1a.2	0.612066	0.841	0.735	4	Higd1a
Htra1.2	0.60735	1	0.851	4	Htra1
Errfi1.2	0.605976	0.788	0.541	4	Errfi1
Dbndd2.1	0.604828	0.956	0.808	4	Dbndd2
Adam15	0.59955	0.673	0.408	4	Adam15
Cyp51.2	0.591059	0.699	0.572	4	Cyp51
Echs1	0.589267	0.903	0.702	4	Echs1
Scd1.1	0.588343	0.796	0.625	4	Scd1
Psap.1	0.576477	1	0.954	4	Psap
Srebf1	0.57307	0.593	0.428	4	Srebf1
Slc25a13	0.569474	0.673	0.355	4	Slc25a13
Tob1	0.563656	0.814	0.607	4	Tob1
Sv2a.2	0.561108	0.956	0.794	4	Sv2a
Bcl2l1.2	0.560938	0.92	0.753	4	Bcl2l1
Ewsr1	0.558738	0.752	0.622	4	Ewsr1
Adssl1.3	0.551409	0.903	0.802	4	Adssl1
Ifrd1.2	0.542997	0.885	0.66	4	Ifrd1
Itpk1	0.540568	0.965	0.825	4	Itpk1
Tubb3.2	0.538567	0.903	0.713	4	Tubb3
Got1.1	0.537579	0.69	0.446	4	Got1
Pcyt2.2	0.531274	0.77	0.613	4	Pcyt2
Tubb4a	0.524208	1	0.969	4	Tubb4a
Dock9	0.517702	0.814	0.6	4	Dock9
Nudt4.1	0.516488	0.841	0.746	4	Nudt4
Mrpl41.1	0.51089	0.788	0.633	4	Mrpl41
Cstb.3	0.510522	0.973	0.802	4	Cstb
Dennd5b	0.504699	0.726	0.517	4	Dennd5b
Tmem132b	0.5036	0.522	0.265	4	Tmem132b
Dnm2.1	0.493059	0.894	0.751	4	Dnm2
Gstm5.1	0.488912	0.85	0.844	4	Gstm5
Aldoc.2	0.488185	0.602	0.426	4	Aldoc
Shisa4.1	0.488143	0.965	0.889	4	Shisa4
Ppia	0.486753	0.991	0.999	4	Ppia
Mat2a.2	0.483134	1	0.899	4	Mat2a
Sgk1.3	0.474973	1	0.927	4	Sgk1
Snx24	0.474613	0.602	0.378	4	Snx24
Ntmt1	0.471501	0.504	0.293	4	Ntmt1
Rab31	0.471389	0.885	0.776	4	Rab31
Sema6a.2	0.470224	0.788	0.566	4	Sema6a
Arap2.2	0.46935	0.894	0.757	4	Arap2
Msrb1.1	0.464157	0.938	0.808	4	Msrb1
Scd2.1	0.463452	1	0.985	4	Scd2
Rnpep	0.455616	0.593	0.445	4	Rnpep
Hsd17b10	0.450729	0.858	0.71	4	Hsd17b10
Lzts2.1	0.449599	0.894	0.744	4	Lzts2
Ddx5	0.44814	1	0.965	4	Ddx5
Mrps34.1	0.447072	0.735	0.536	4	Mrps34
Itm2b.1	0.446847	1	0.986	4	Itm2b
Msmo1.2	0.446379	0.814	0.691	4	Msmo1
Tob2	0.439346	0.735	0.577	4	Tob2
Mif4gd	0.437173	0.637	0.496	4	Mif4gd
Ptpn11	0.43686	0.912	0.776	4	Ptpn11
Camk2n1.1	0.435686	0.699	0.485	4	Camk2n1
Rhou.1	0.435126	0.938	0.839	4	Rhou
Tfdp2	0.435049	0.788	0.639	4	Tfdp2
Hhatl.1	0.434753	0.549	0.353	4	Hhatl
Ppfibp2.1	0.430878	0.779	0.623	4	Ppfibp2
Dtd1	0.429066	0.752	0.615	4	Dtd1
Map1lc3a.2	0.427212	0.903	0.794	4	Map1lc3a
Elmo1	0.423144	0.858	0.782	4	Elmo1
Crebrf	0.422515	0.752	0.592	4	Crebrf
Tmeff1.1	0.422343	0.903	0.776	4	Tmeff1
Hint1	0.422254	0.991	0.983	4	Hint1
Zcchc7	0.418002	0.823	0.613	4	Zcchc7
Usp22	0.414798	0.735	0.522	4	Usp22
Hibadh	0.411831	0.752	0.54	4	Hibadh
Nt5c3.2	0.410872	0.655	0.532	4	Nt5c3
D7Ertd443e.1	0.406703	0.761	0.691	4	D7Ertd443e
Anapc16	0.403104	0.858	0.71	4	Anapc16
Kif1a	0.402424	0.894	0.793	4	Kif1a
Hcn2.2	0.401199	0.858	0.614	4	Hcn2
Lcorl	0.400378	0.593	0.492	4	Lcorl
Sec62	0.400294	0.982	0.944	4	Sec62
Psmb2.1	0.399021	0.973	0.855	4	Psmb2
Kdm4a.2	0.398956	0.699	0.49	4	Kdm4a
Yif1b	0.398192	0.708	0.524	4	Yif1b
St6galnac3	0.390035	0.761	0.563	4	St6galnac3
Sox2.2	0.387371	0.664	0.49	4	Sox2
Pakap	0.381493	0.549	0.327	4	Pakap
Tmem19	0.380827	0.611	0.418	4	Tmem19
Sbf2	0.375315	0.584	0.398	4	Sbf2
Tprn.1	0.368511	0.876	0.739	4	Tprn
Wrap53	0.36752	0.566	0.447	4	Wrap53
Rabac1	0.367249	1	0.954	4	Rabac1
Fdft1.1	0.367052	0.681	0.544	4	Fdft1
Fbxo31	0.364996	0.602	0.319	4	Fbxo31
Ralbp1.1	0.360753	0.867	0.714	4	Ralbp1
Tmod2.3	0.360524	0.991	0.874	4	Tmod2
Mpv17l2	0.355385	0.513	0.342	4	Mpv17l2
Ube2i	0.35524	0.77	0.595	4	Ube2i
Wdr20	0.353287	0.619	0.422	4	Wdr20
Rcan2.3	0.350526	0.956	0.851	4	Rcan2
Klf15	0.347428	0.549	0.383	4	Klf15
Aplp2.1	0.343985	0.991	0.927	4	Aplp2
Atraid	0.340965	0.965	0.855	4	Atraid
Por.1	0.340884	0.637	0.507	4	Por
Ndufv2	0.339327	0.92	0.839	4	Ndufv2
Efnb3	0.336896	0.965	0.902	4	Efnb3
Pcolce2	0.336789	0.779	0.632	4	Pcolce2
Lrrc4b	0.33625	0.664	0.461	4	Lrrc4b
Nkx6-2	0.335098	1	0.925	4	Nkx6-2
Slc6a6.1	0.334712	0.885	0.752	4	Slc6a6
Sqstm1.1	0.334633	0.912	0.794	4	Sqstm1
Tspan2.3	0.331585	0.982	0.927	4	Tspan2
Pim3.1	0.330097	0.956	0.839	4	Pim3
Atp6v0e.2	0.328939	0.903	0.803	4	Atp6v0e
Rbl2	0.328662	0.593	0.435	4	Rbl2
Hadh	0.326931	0.761	0.681	4	Hadh
Cyhr1	0.326856	0.832	0.781	4	Cyhr1
Ndfip1	0.322669	0.982	0.903	4	Ndfip1
Ddt	0.320456	0.832	0.678	4	Ddt
Os9	0.319211	0.664	0.578	4	Os9
Dmwd	0.318886	0.761	0.607	4	Dmwd
Paqr6.1	0.318154	0.593	0.398	4	Paqr6
Spr	0.317981	0.549	0.46	4	Spr
Pmm1	0.317536	0.805	0.704	4	Pmm1
Map1lc3b	0.315713	0.982	0.919	4	Map1lc3b
Bub3	0.313799	0.823	0.67	4	Bub3
Tprgl	0.313022	0.858	0.737	4	Tprgl
Aig1	0.312004	0.965	0.788	4	Aig1
B3galt5.1	0.311973	0.699	0.633	4	B3galt5
Mfn1	0.308377	0.558	0.409	4	Mfn1
Sat1.3	0.307978	0.77	0.644	4	Sat1
Spns2	0.307757	0.504	0.375	4	Spns2
Strn.1	0.305066	0.655	0.526	4	Strn
Arhgef2	0.304459	0.77	0.633	4	Arhgef2
Pink1.1	0.304238	0.717	0.638	4	Pink1
Idh3g	0.300209	0.655	0.524	4	Idh3g
Tbcc	0.299426	0.513	0.385	4	Tbcc
Arl4d.1	0.298954	0.743	0.578	4	Arl4d
Egln2	0.298244	0.575	0.462	4	Egln2
Csnk1e	0.297242	0.726	0.6	4	Csnk1e
Abca2.1	0.294983	0.982	0.902	4	Abca2
Myrf	0.294197	0.903	0.859	4	Myrf
Cacnb4	0.29294	0.531	0.365	4	Cacnb4
Nktr	0.292618	0.77	0.666	4	Nktr
Hagh	0.29047	0.823	0.67	4	Hagh
Tcf25	0.288975	0.903	0.831	4	Tcf25
Abhd17a.2	0.288442	0.761	0.673	4	Abhd17a
Olfml1.1	0.285365	0.637	0.508	4	Olfml1
Srrm2	0.282637	0.965	0.913	4	Srrm2
Nde1.2	0.281488	0.788	0.654	4	Nde1
Tbc1d15	0.277482	0.726	0.675	4	Tbc1d15
Herpud1	0.276107	0.611	0.48	4	Herpud1
Tra2b	0.275123	0.735	0.597	4	Tra2b
Med30	0.275025	0.752	0.65	4	Med30
Prdx5.1	0.273437	0.876	0.751	4	Prdx5
Zfp24	0.27259	0.699	0.558	4	Zfp24
Eml2.2	0.272212	0.735	0.657	4	Eml2
Spred1	0.268978	0.673	0.505	4	Spred1
Ndufa12	0.268931	0.823	0.765	4	Ndufa12
Gnao1	0.268495	0.982	0.93	4	Gnao1
Hipk1	0.268239	0.575	0.366	4	Hipk1
Hepacam.3	0.266865	0.894	0.79	4	Hepacam
Mapk8ip1.2	0.266763	0.965	0.861	4	Mapk8ip1
Cab39	0.266064	0.699	0.609	4	Cab39
Gpd1.2	0.265981	0.805	0.596	4	Gpd1
Pigyl	0.265354	0.929	0.841	4	Pigyl
Ezh1	0.26498	0.549	0.397	4	Ezh1
Hmgn2	0.264922	0.912	0.758	4	Hmgn2
Slc4a2	0.264907	0.602	0.485	4	Slc4a2
Fasn	0.262168	0.664	0.532	4	Fasn
S100a1.3	0.259756	0.912	0.857	4	S100a1
Clmn.3	0.25936	0.735	0.602	4	Clmn
Zbtb8os	0.256442	0.531	0.456	4	Zbtb8os
Wbp11	0.256002	0.717	0.596	4	Wbp11
Tnrc6a	0.255023	0.708	0.611	4	Tnrc6a
Fis1	0.254426	0.991	0.933	4	Fis1
Myl12a	0.2535	0.655	0.563	4	Myl12a
Flywch1	0.253477	0.558	0.448	4	Flywch1
Lmbrd1	0.252815	0.885	0.779	4	Lmbrd1
Mphosph6	0.252685	0.593	0.435	4	Mphosph6
Hnrnpdl	0.252501	0.814	0.703	4	Hnrnpdl
Fech	0.252304	0.558	0.464	4	Fech
Psma6	0.251563	0.885	0.778	4	Psma6
Zfp644	0.250143	0.619	0.492	4	Zfp644
Rac1	-0.250148	0.885	0.9	4	Rac1
Rpl36al	-0.250408	0.611	0.733	4	Rpl36al
Prkar1a.1	-0.251186	0.752	0.836	4	Prkar1a
Rpl28.1	-0.254991	0.991	0.988	4	Rpl28
Metap2	-0.255198	0.681	0.77	4	Metap2
Hipk2.1	-0.256033	0.655	0.769	4	Hipk2
Cdv3.1	-0.256057	0.566	0.682	4	Cdv3
Ndufb1	-0.256458	0.867	0.897	4	Ndufb1
Smim14	-0.258124	0.69	0.764	4	Smim14
Magt1.1	-0.258146	0.628	0.703	4	Magt1
Polb	-0.259313	0.336	0.51	4	Polb
Hadhb	-0.259466	0.442	0.551	4	Hadhb
Senp6	-0.259588	0.54	0.662	4	Senp6
Ppp1ca	-0.260564	0.69	0.766	4	Ppp1ca
Eif1ax	-0.260828	0.584	0.709	4	Eif1ax
Commd1	-0.261975	0.558	0.697	4	Commd1
Lrpap1	-0.263546	0.451	0.592	4	Lrpap1
Gpm6b.2	-0.263897	0.991	0.967	4	Gpm6b
Rhoa	-0.264794	0.982	0.948	4	Rhoa
Ndufs4	-0.264826	0.513	0.697	4	Ndufs4
Wipi1.1	-0.266512	0.513	0.644	4	Wipi1
Dynlt3	-0.269304	0.381	0.511	4	Dynlt3
Mbnl2.1	-0.269364	0.947	0.925	4	Mbnl2
Eef1a1.1	-0.270222	1	0.996	4	Eef1a1
Clta	-0.270505	0.876	0.883	4	Clta
Arl6ip1	-0.273478	0.938	0.933	4	Arl6ip1
Slc24a2.2	-0.273499	0.77	0.81	4	Slc24a2
Brk1	-0.27359	0.779	0.832	4	Brk1
Rps29.1	-0.274855	1	0.993	4	Rps29
Rps11.1	-0.274949	0.991	0.977	4	Rps11
Saraf	-0.275162	0.779	0.871	4	Saraf
Kat2b.2	-0.275539	0.522	0.667	4	Kat2b
Pcbp4	-0.275846	0.85	0.857	4	Pcbp4
Eif5a	-0.276408	0.823	0.859	4	Eif5a
Ost4	-0.276485	0.681	0.734	4	Ost4
Oaz1	-0.278628	0.973	0.965	4	Oaz1
Arf5	-0.27932	0.726	0.776	4	Arf5
Atp5mpl	-0.279368	0.814	0.828	4	Atp5mpl
Actr2.1	-0.279582	0.442	0.571	4	Actr2
Tcf4.1	-0.279842	0.92	0.896	4	Tcf4
Picalm.1	-0.279921	0.646	0.757	4	Picalm
Cdc42ep2.1	-0.280442	0.664	0.757	4	Cdc42ep2
Arid4b	-0.2807	0.646	0.737	4	Arid4b
Gnb1	-0.280813	0.77	0.79	4	Gnb1
Tmed10.1	-0.281938	0.991	0.97	4	Tmed10
Itm2c	-0.282101	0.54	0.665	4	Itm2c
Gab1.1	-0.282244	0.664	0.714	4	Gab1
Tmem208	-0.283214	0.566	0.659	4	Tmem208
Csrp1.3	-0.284746	0.973	0.955	4	Csrp1
Adipor1	-0.28503	0.46	0.586	4	Adipor1
Chmp5	-0.285685	0.788	0.841	4	Chmp5
Elavl3.2	-0.28577	0.867	0.867	4	Elavl3
Hdac11.1	-0.286219	0.372	0.513	4	Hdac11
Rhog.1	-0.286381	0.77	0.793	4	Rhog
Grb2	-0.286968	0.549	0.662	4	Grb2
mt-Nd4.1	-0.287445	1	0.993	4	mt-Nd4
Tbcb.1	-0.287512	0.743	0.787	4	Tbcb
Serf2	-0.28801	1	0.974	4	Serf2
Rab6b.1	-0.288131	0.531	0.626	4	Rab6b
Secisbp2l.2	-0.28824	0.894	0.872	4	Secisbp2l
Selenom.1	-0.288515	0.965	0.917	4	Selenom
Hs3st1.1	-0.290178	0.407	0.554	4	Hs3st1
Lamp1.1	-0.290323	1	0.976	4	Lamp1
Pip4k2a.2	-0.290565	0.929	0.88	4	Pip4k2a
Atp6v0b	-0.292179	0.938	0.949	4	Atp6v0b
Snx3	-0.29228	0.823	0.843	4	Snx3
Sik3	-0.292635	0.708	0.769	4	Sik3
Ppt1.1	-0.292676	0.336	0.514	4	Ppt1
Phlpp1.1	-0.296203	0.69	0.802	4	Phlpp1
Ppib	-0.296514	0.903	0.918	4	Ppib
Mrpl52	-0.296881	0.469	0.589	4	Mrpl52
Laptm4a.1	-0.299481	0.805	0.824	4	Laptm4a
Canx	-0.300181	0.841	0.858	4	Canx
Rtn3.1	-0.300357	0.885	0.906	4	Rtn3
Unc5b.1	-0.300622	0.407	0.584	4	Unc5b
Cd81.3	-0.300867	0.991	0.971	4	Cd81
Prdx6	-0.30144	0.584	0.642	4	Prdx6
Stip1	-0.302248	0.398	0.557	4	Stip1
Dstn	-0.302395	0.903	0.919	4	Dstn
Ctnna1.1	-0.303312	0.584	0.654	4	Ctnna1
Vps29	-0.303646	0.531	0.685	4	Vps29
Eef1b2.1	-0.304646	0.903	0.931	4	Eef1b2
Ank2.1	-0.30492	0.991	0.918	4	Ank2
Degs1.2	-0.304939	0.867	0.856	4	Degs1
Map7d1.1	-0.304946	0.832	0.868	4	Map7d1
Snx6.1	-0.305188	0.593	0.727	4	Snx6
Pcdh9.1	-0.30573	0.858	0.851	4	Pcdh9
Tmem223	-0.305986	0.496	0.669	4	Tmem223
Rps17.1	-0.306382	0.965	0.973	4	Rps17
Scarb2.2	-0.306433	0.726	0.759	4	Scarb2
Erbin.3	-0.307302	0.77	0.832	4	Erbin
Ghitm	-0.307894	0.54	0.688	4	Ghitm
Nudt3	-0.308729	0.416	0.594	4	Nudt3
Cct3	-0.308985	0.655	0.718	4	Cct3
Aspa.3	-0.309528	0.92	0.84	4	Aspa
Cnp.2	-0.310829	0.991	0.971	4	Cnp
Tmem9b	-0.311071	0.442	0.611	4	Tmem9b
Nenf	-0.31324	0.575	0.703	4	Nenf
Trim2.1	-0.313953	0.69	0.765	4	Trim2
Jam3.1	-0.314456	0.85	0.87	4	Jam3
Enpp5	-0.314943	0.372	0.571	4	Enpp5
Cnpy2	-0.315883	0.46	0.638	4	Cnpy2
Pcmt1	-0.316172	0.487	0.61	4	Pcmt1
Morf4l2.1	-0.31619	0.513	0.652	4	Morf4l2
Ran	-0.316895	0.788	0.806	4	Ran
Ppp2ca	-0.317755	0.788	0.861	4	Ppp2ca
Mpc2	-0.319043	0.841	0.862	4	Mpc2
Ndufs8	-0.320414	0.504	0.683	4	Ndufs8
Mtln	-0.320473	0.336	0.515	4	Mtln
Ciao2b	-0.320955	0.522	0.645	4	Ciao2b
Mtus1.1	-0.321044	0.398	0.544	4	Mtus1
Txnl4a	-0.32111	0.372	0.536	4	Txnl4a
Urm1	-0.321849	0.416	0.569	4	Urm1
Josd2.1	-0.322402	0.912	0.917	4	Josd2
St18.2	-0.323166	0.398	0.522	4	St18
Hmgb1	-0.323434	0.991	0.962	4	Hmgb1
BC005624	-0.327485	0.522	0.666	4	BC005624
Cox8a	-0.328802	0.965	0.983	4	Cox8a
Smap2.1	-0.331346	0.381	0.555	4	Smap2
Bnip3l.2	-0.332746	0.938	0.917	4	Bnip3l
Enpp4.1	-0.332786	0.69	0.713	4	Enpp4
Oxct1.1	-0.332888	0.354	0.511	4	Oxct1
Dennd5a.1	-0.333127	0.619	0.722	4	Dennd5a
Dpysl2.2	-0.333163	0.982	0.931	4	Dpysl2
Npc1.1	-0.335465	0.69	0.777	4	Npc1
Fnbp1.1	-0.33732	0.867	0.861	4	Fnbp1
Fryl.1	-0.337602	0.531	0.621	4	Fryl
Atp5e	-0.338815	0.947	0.932	4	Atp5e
Pomp.1	-0.33982	0.814	0.874	4	Pomp
Rdx.1	-0.341498	0.912	0.884	4	Rdx
Inf2	-0.341955	0.593	0.703	4	Inf2
Cct4	-0.342058	0.504	0.665	4	Cct4
Mapk3.1	-0.343411	0.752	0.774	4	Mapk3
Dnajb2.1	-0.34457	0.885	0.88	4	Dnajb2
Ybx3	-0.345191	0.681	0.771	4	Ybx3
Gnaq	-0.345765	0.434	0.611	4	Gnaq
Adamts4.1	-0.346602	0.389	0.559	4	Adamts4
Hsph1.1	-0.347723	0.389	0.56	4	Hsph1
Cdk19.1	-0.348271	0.513	0.676	4	Cdk19
Tmem229a.2	-0.349394	0.673	0.72	4	Tmem229a
Cops9.1	-0.353666	0.655	0.758	4	Cops9
Pdia6	-0.353744	0.611	0.719	4	Pdia6
Tspan15	-0.354013	0.673	0.768	4	Tspan15
Hspe1	-0.355207	0.85	0.855	4	Hspe1
Kcnk13	-0.355787	0.301	0.541	4	Kcnk13
Cdc37	-0.355915	0.531	0.7	4	Cdc37
Rala.1	-0.356065	0.566	0.694	4	Rala
Zeb2.1	-0.356596	0.903	0.921	4	Zeb2
Anapc11.1	-0.356754	0.628	0.772	4	Anapc11
Ttll7.2	-0.361298	0.947	0.881	4	Ttll7
Atxn2.1	-0.36206	0.381	0.546	4	Atxn2
Cltb.1	-0.362321	0.646	0.7	4	Cltb
Fermt2	-0.362816	0.858	0.874	4	Fermt2
Fam168a.1	-0.362949	0.593	0.667	4	Fam168a
Rps24.1	-0.36392	0.991	0.992	4	Rps24
Car2	-0.365313	1	0.97	4	Car2
Rplp1.1	-0.366437	0.991	0.99	4	Rplp1
Itgb1	-0.367791	0.46	0.594	4	Itgb1
Actn4.2	-0.368003	0.336	0.528	4	Actn4
Sox10	-0.368238	0.814	0.858	4	Sox10
Tmem30a.1	-0.369965	0.708	0.815	4	Tmem30a
Selenow	-0.370028	0.973	0.977	4	Selenow
Apc.1	-0.370919	0.664	0.698	4	Apc
Pcsk1n.3	-0.371385	0.805	0.779	4	Pcsk1n
Sec11c.2	-0.371692	0.982	0.975	4	Sec11c
Anks1b.2	-0.37266	0.717	0.774	4	Anks1b
Evi2a.2	-0.373139	0.832	0.841	4	Evi2a
Sypl.2	-0.37379	0.796	0.832	4	Sypl
Cox7a2.1	-0.374387	0.973	0.951	4	Cox7a2
S100a16.2	-0.374822	0.832	0.896	4	S100a16
Slco3a1.2	-0.375268	0.549	0.634	4	Slco3a1
Kif3a	-0.377782	0.327	0.516	4	Kif3a
Chpt1.1	-0.377886	0.46	0.601	4	Chpt1
Adap1.1	-0.378368	0.558	0.669	4	Adap1
Sptbn1	-0.379384	0.743	0.779	4	Sptbn1
Ddx17.1	-0.379466	0.451	0.598	4	Ddx17
Fa2h.1	-0.379493	0.841	0.865	4	Fa2h
Bpgm	-0.37959	0.903	0.915	4	Bpgm
Septin8.1	-0.380389	0.735	0.826	4	Septin8
Xaf1.2	-0.381235	0.673	0.72	4	Xaf1
Atp1a1	-0.381492	0.743	0.789	4	Atp1a1
Tmbim6.1	-0.381865	0.982	0.942	4	Tmbim6
Tpm3.1	-0.38194	0.628	0.715	4	Tpm3
Golga7.1	-0.382488	0.673	0.769	4	Golga7
Spcs1	-0.382733	0.858	0.864	4	Spcs1
Txndc17	-0.383889	0.628	0.719	4	Txndc17
Cct6a	-0.384036	0.726	0.841	4	Cct6a
Micall1	-0.384426	0.434	0.567	4	Micall1
Ppp3ca.1	-0.384758	0.646	0.752	4	Ppp3ca
Phlda3.1	-0.38521	0.77	0.828	4	Phlda3
Emc10	-0.385283	0.735	0.836	4	Emc10
Prr18.2	-0.387968	0.389	0.569	4	Prr18
Anp32b	-0.388498	0.699	0.758	4	Anp32b
Nap1l1	-0.389347	0.504	0.692	4	Nap1l1
Ahsa1	-0.390455	0.611	0.746	4	Ahsa1
Slc44a1.1	-0.392676	0.912	0.923	4	Slc44a1
Slu7.2	-0.393037	0.593	0.714	4	Slu7
Hspd1	-0.395385	0.717	0.834	4	Hspd1
Etv1.2	-0.395405	0.779	0.822	4	Etv1
Mrfap1	-0.395459	0.938	0.967	4	Mrfap1
Rhobtb3.1	-0.396013	0.416	0.563	4	Rhobtb3
Calr.1	-0.396219	0.841	0.857	4	Calr
Caprin1	-0.397042	0.434	0.598	4	Caprin1
Ptges3	-0.398112	0.903	0.926	4	Ptges3
Cldnd1	-0.398225	0.876	0.883	4	Cldnd1
Cacybp	-0.39962	0.602	0.709	4	Cacybp
Ywhah.1	-0.400721	0.319	0.547	4	Ywhah
Snx30.2	-0.403093	0.407	0.544	4	Snx30
Fkbp2	-0.403495	0.575	0.758	4	Fkbp2
Tapbp.1	-0.405815	0.434	0.527	4	Tapbp
Stmn4.2	-0.405957	0.982	0.94	4	Stmn4
Dcaf17.1	-0.407823	0.531	0.671	4	Dcaf17
Eif4a2	-0.408147	0.566	0.719	4	Eif4a2
Plin3.2	-0.41325	0.487	0.59	4	Plin3
Elovl7.1	-0.413616	0.628	0.752	4	Elovl7
Ybx1	-0.415022	0.92	0.926	4	Ybx1
Qdpr.3	-0.415038	0.991	0.94	4	Qdpr
mt-Nd2.2	-0.415811	0.991	0.995	4	mt-Nd2
Reep3.1	-0.41845	0.788	0.849	4	Reep3
Gde1.2	-0.420308	0.832	0.874	4	Gde1
Plxdc2.1	-0.423285	0.46	0.621	4	Plxdc2
Aatk.1	-0.425151	0.628	0.771	4	Aatk
Chchd2.1	-0.426607	0.991	0.986	4	Chchd2
Reep5.2	-0.4278	0.991	0.938	4	Reep5
Pea15a.1	-0.429943	0.681	0.732	4	Pea15a
Cst3	-0.43158	0.788	0.851	4	Cst3
App.2	-0.431621	0.991	0.968	4	App
Gnai1.2	-0.432771	0.796	0.833	4	Gnai1
Fnta.1	-0.433428	0.531	0.672	4	Fnta
Tra2a.1	-0.435669	0.354	0.57	4	Tra2a
Pacs2.1	-0.435945	0.726	0.779	4	Pacs2
Sccpdh.2	-0.436558	0.619	0.758	4	Sccpdh
Mt1.2	-0.43982	1	0.963	4	Mt1
Add3.2	-0.440608	0.655	0.732	4	Add3
Rap1a.1	-0.444623	0.867	0.915	4	Rap1a
Hsp90aa1.2	-0.445744	0.991	0.989	4	Hsp90aa1
Insc.1	-0.445913	0.336	0.561	4	Insc
Hsp90b1	-0.446239	0.885	0.934	4	Hsp90b1
Hnrnpr	-0.446348	0.381	0.607	4	Hnrnpr
Lamtor4	-0.450531	0.593	0.728	4	Lamtor4
Ubb	-0.451573	1	0.998	4	Ubb
Septin7.2	-0.453598	1	0.962	4	Septin7
Pdlim2.1	-0.455315	0.814	0.834	4	Pdlim2
Rpn2	-0.456692	0.274	0.524	4	Rpn2
Slc6a9.1	-0.457011	0.319	0.551	4	Slc6a9
[truncated: 3,346 more rows]
