# Supplementary material for: MHC class I and MHC class II reporter mice enable analysis of immune oligodendroglia in mouse models of multiple sclerosis
Source: eLife journal article supplement (doi:10.7554/elife.82938), 2023-04-14

**A***B2m<sup>tdT</sup>**Cd74<sup>tdT</sup>*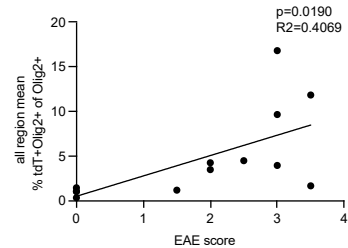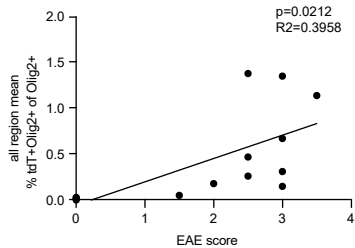**B***B2m<sup>tdT</sup>**Cd74<sup>tdT</sup>*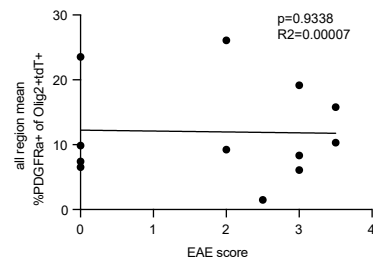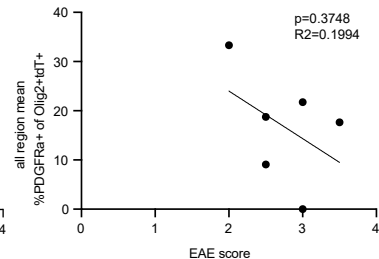**C***B2m<sup>tdT</sup>**Cd74<sup>tdT</sup>*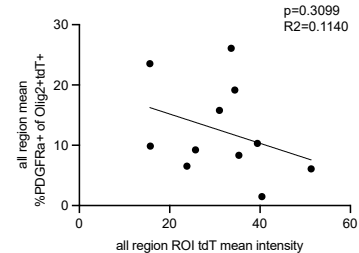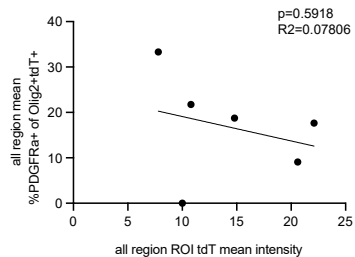**D***B2m<sup>tdT</sup>**Cd74<sup>tdT</sup>*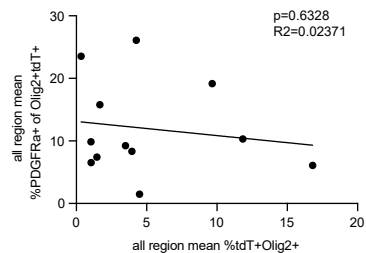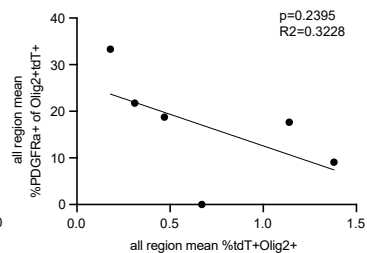

Supplement: supp [file elife_poa_e82938_Figure_7_figure_supplement_1.pdf › elife_poa_e82938_Figure_7_figure_supplement_1.pdf]
