# Supplementary figures and images for: MHC class I and MHC class II reporter mice enable analysis of immune oligodendroglia in mouse models of multiple sclerosis
Source: eLife journal article supplement (doi:10.7554/elife.82938), 2023-04-14

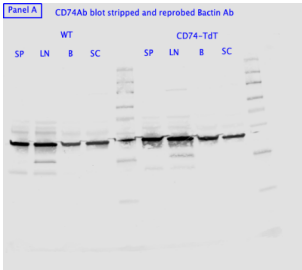

0004348\_02

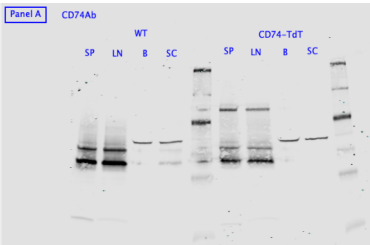

0004316\_02

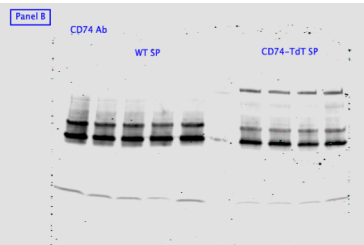

0004306\_02

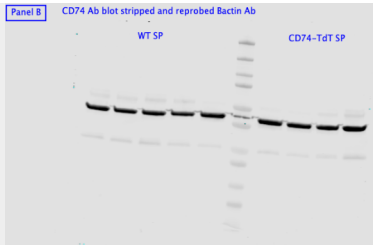

0004311\_02

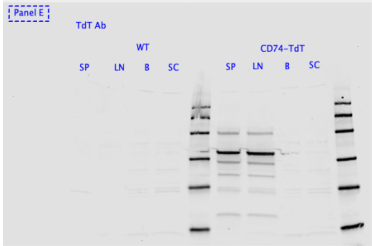

0004317\_03

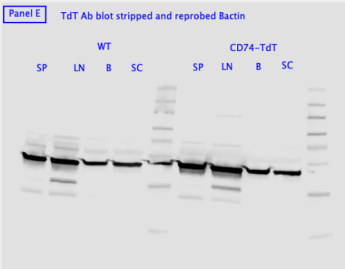

0004347\_05

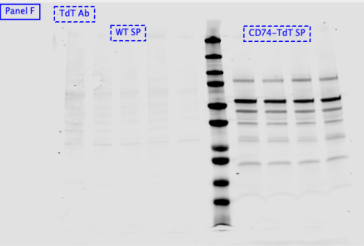

0004307\_02

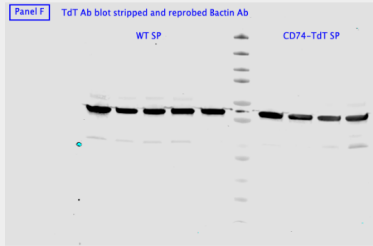

0004313\_02

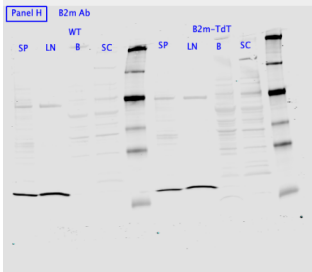

0004323\_02

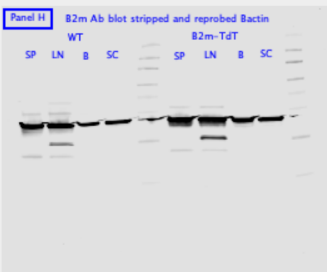

0004335\_02

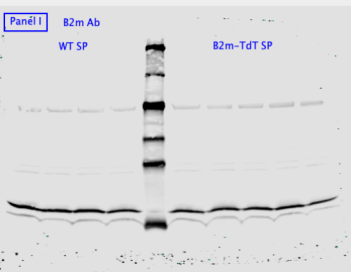

0004288\_03

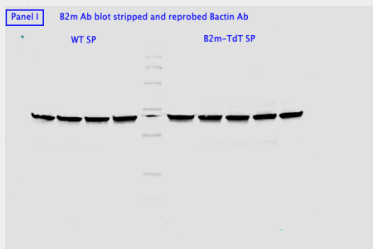

0004300\_03

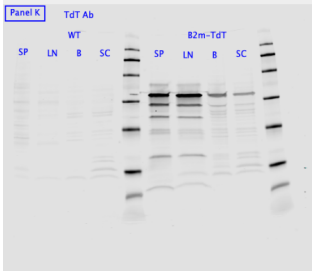

0004324\_02

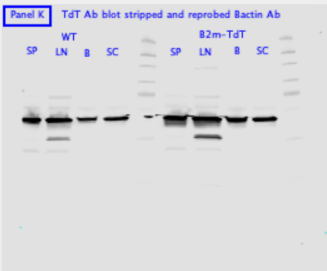

0004336\_02

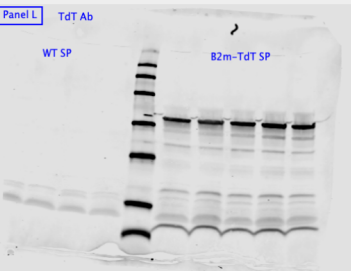

0004290\_03

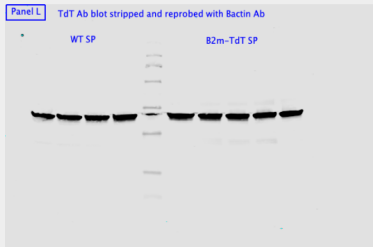

0004300\_04

Supplement: fig1-figsupp1-data1 [file Figure 1 figure supplement 1 source data 1.pdf › Figure 1 figure supplement 1 source data 1.pdf]

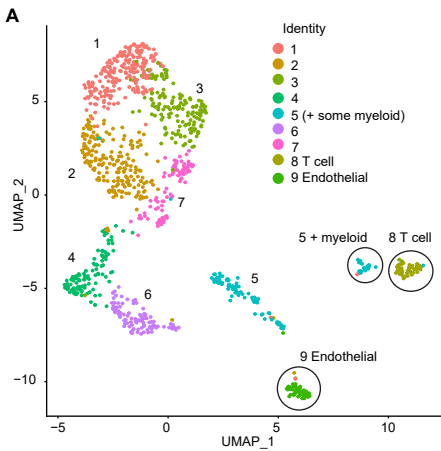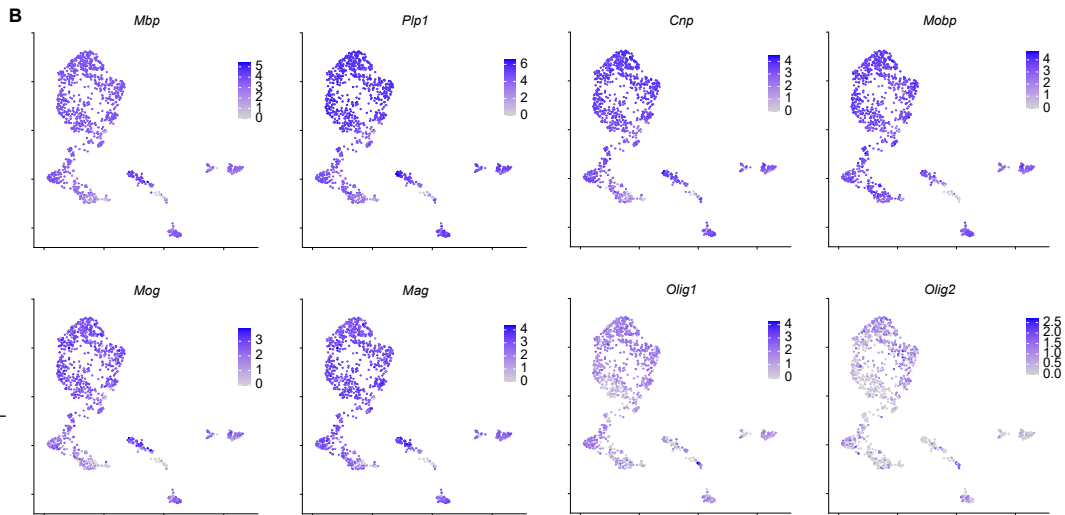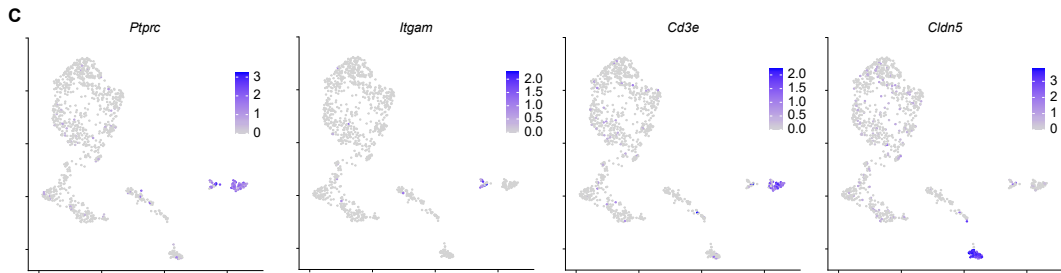

Supplement: supp [file elife_poa_e82938_Figure_10_figure_supplement_1.pdf › elife_poa_e82938_Figure_10_figure_supplement_1.pdf]

**A**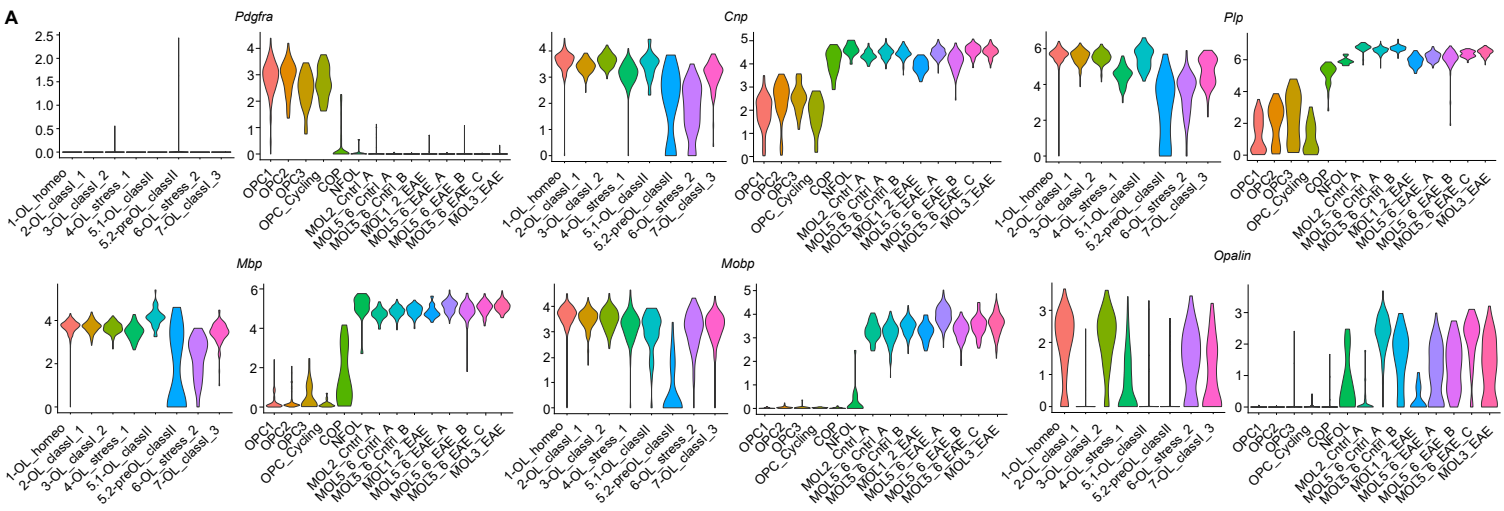

Supplement: supp [file elife_poa_e82938_Figure_11_figure_supplement_1.pdf › elife_poa_e82938_Figure_11_figure_supplement_1.pdf]

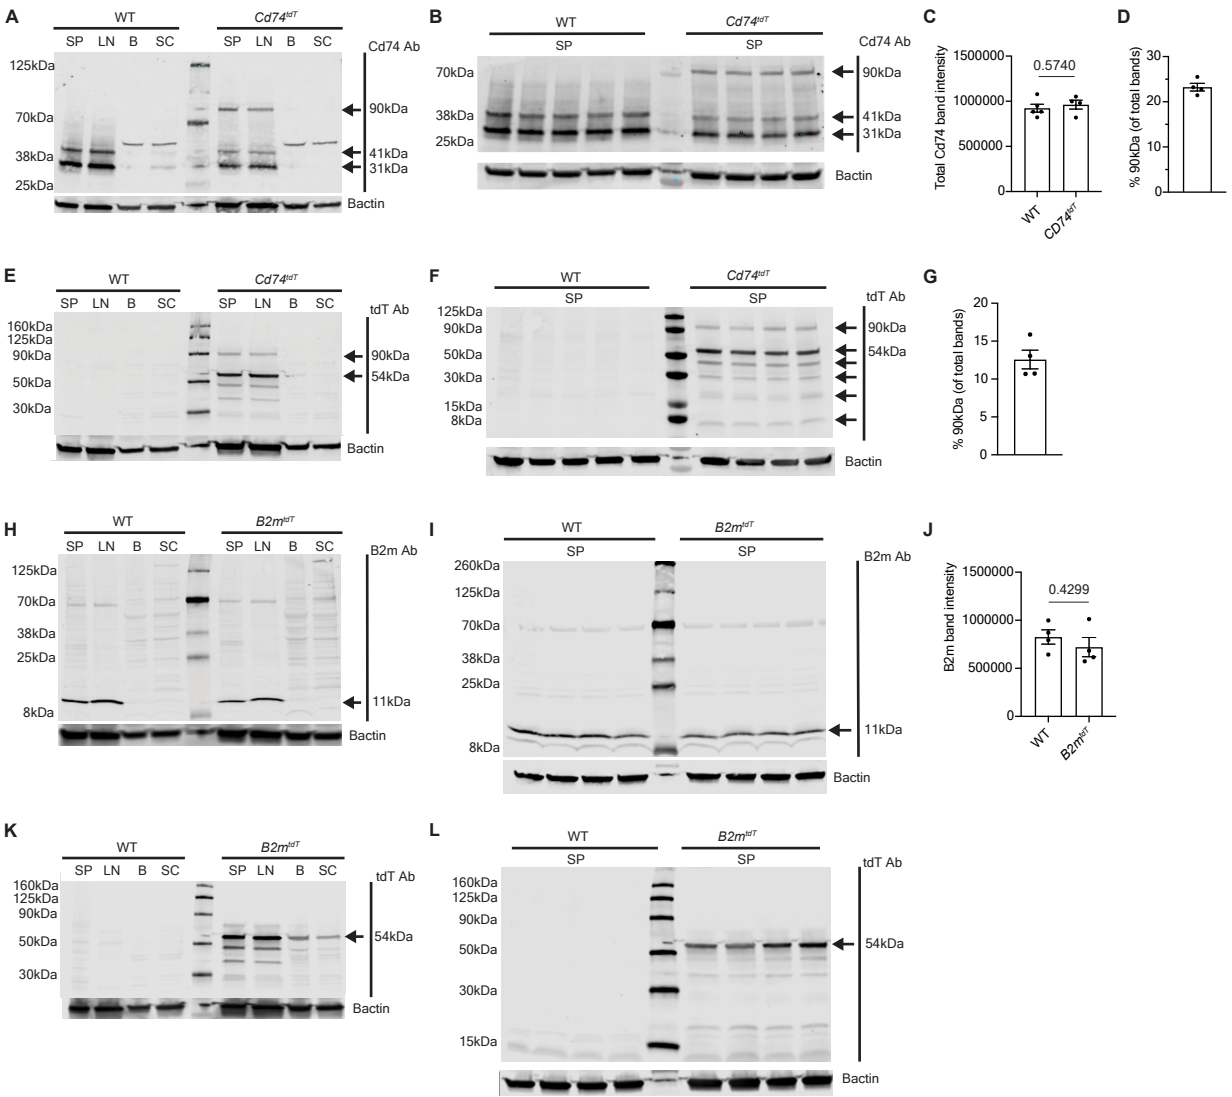

Supplement: supp [file elife_poa_e82938_Figure_1_figure_supplement_1.pdf › elife_poa_e82938_Figure_1_figure_supplement_1.pdf]

**A**

■ Cd74<sup>tdT</sup> splenocytes  
■ WT splenocytes

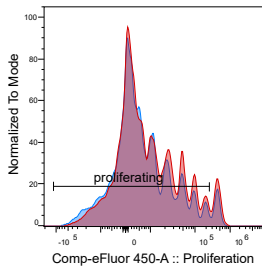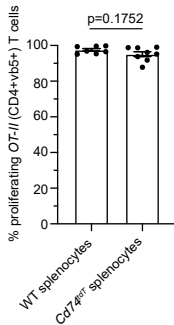**B**

■ Cd74<sup>tdT</sup> splenocytes  
■ WT splenocytes

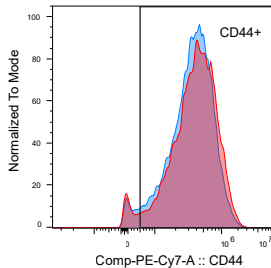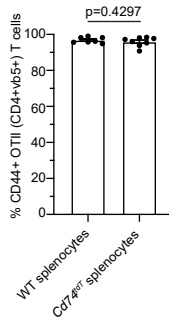**C**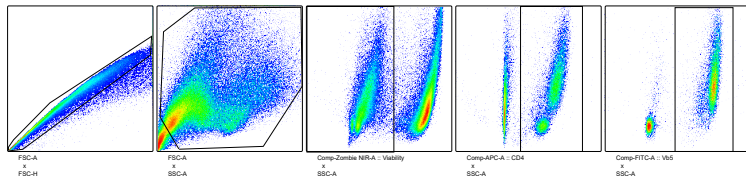

Supplement: supp [file elife_poa_e82938_Figure_1_figure_supplement_2.pdf › elife_poa_e82938_Figure_1_figure_supplement_2.pdf]

**A*****B2m<sup>tdT</sup>* MOG<sub>35-55</sub> EAE lesion**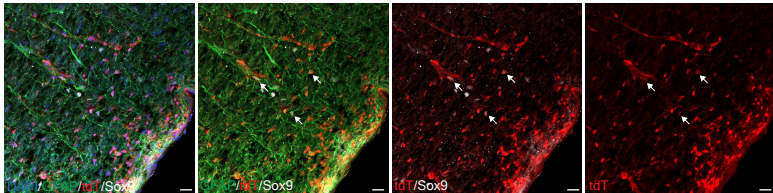***Cd74<sup>tdT</sup>* MOG<sub>35-55</sub> EAE lesion**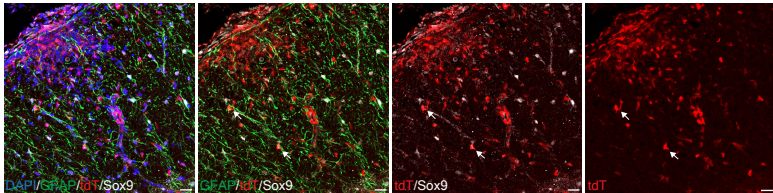

Supplement: supp [file elife_poa_e82938_Figure_7_figure_supplement_2.pdf › elife_poa_e82938_Figure_7_figure_supplement_2.pdf]

**A**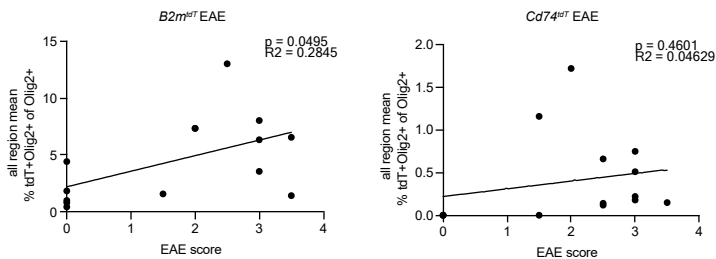**B**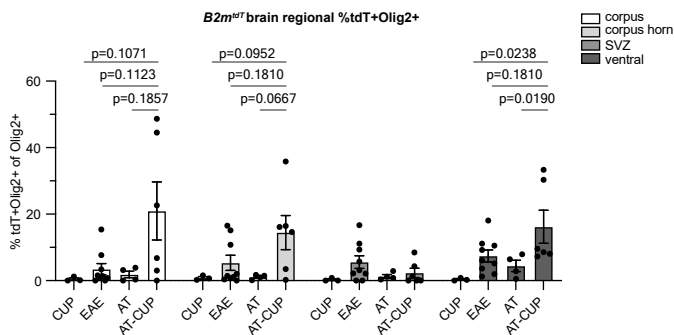**C**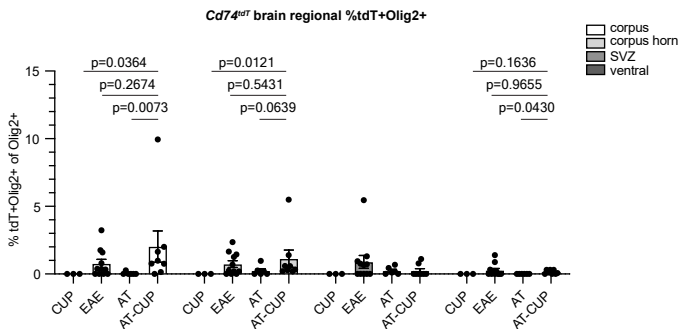**D**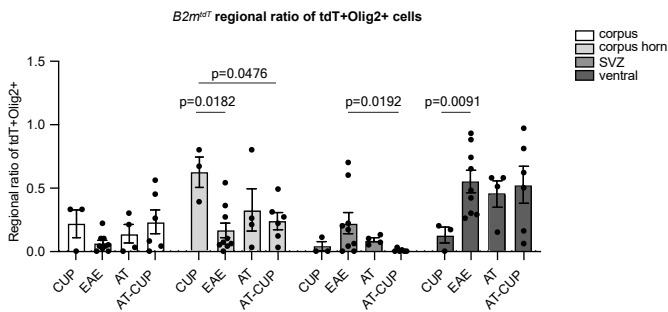

Supplement: supp [file elife_poa_e82938_Figure_8_figure_supplement_1.pdf › elife_poa_e82938_Figure_8_figure_supplement_1.pdf]

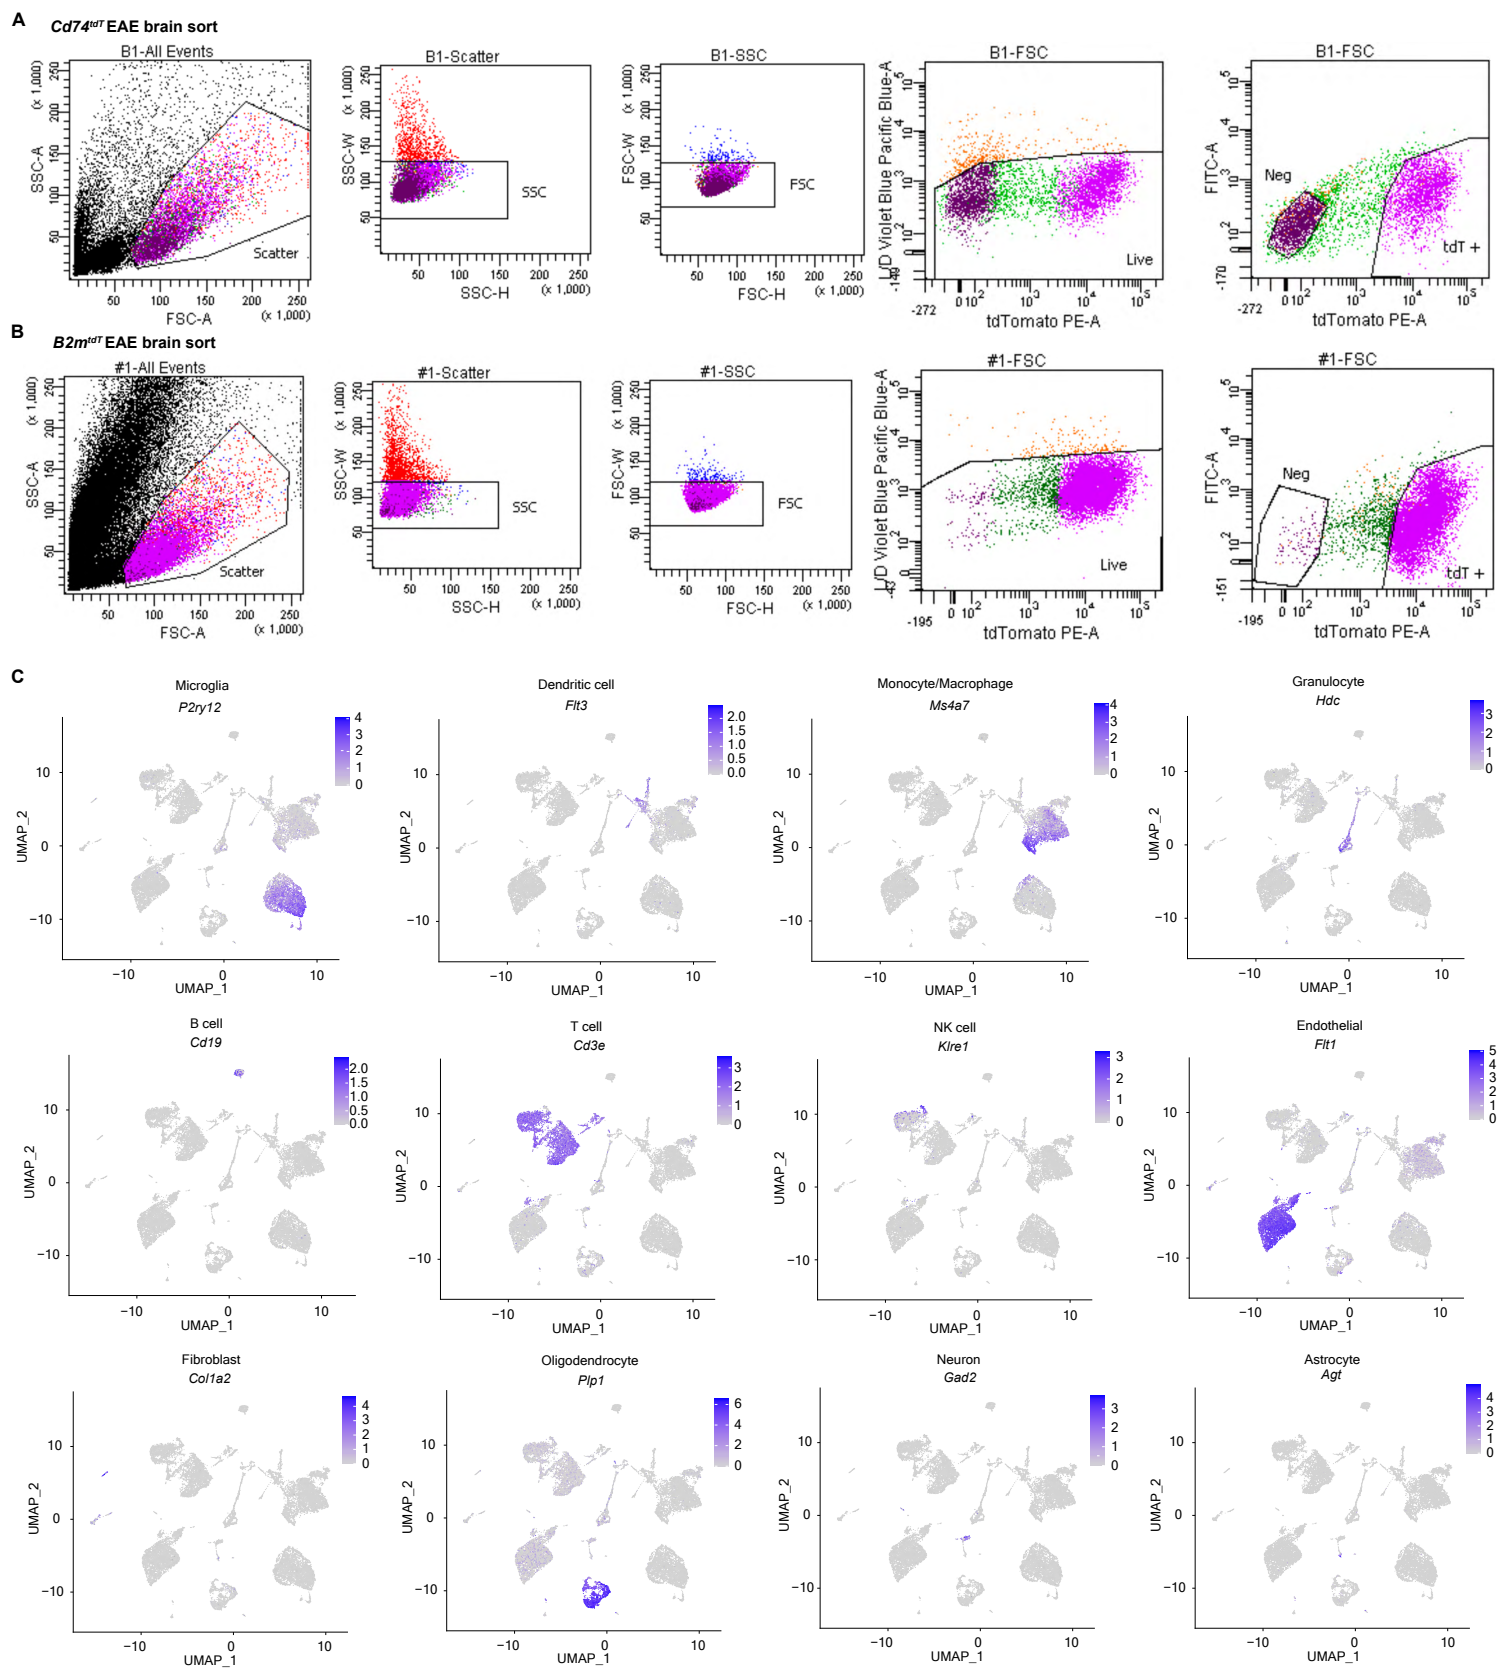

Supplement: supp [file elife_poa_e82938_Figure_9_figure_supplement_1.pdf › elife_poa_e82938_Figure_9_figure_supplement_1.pdf]

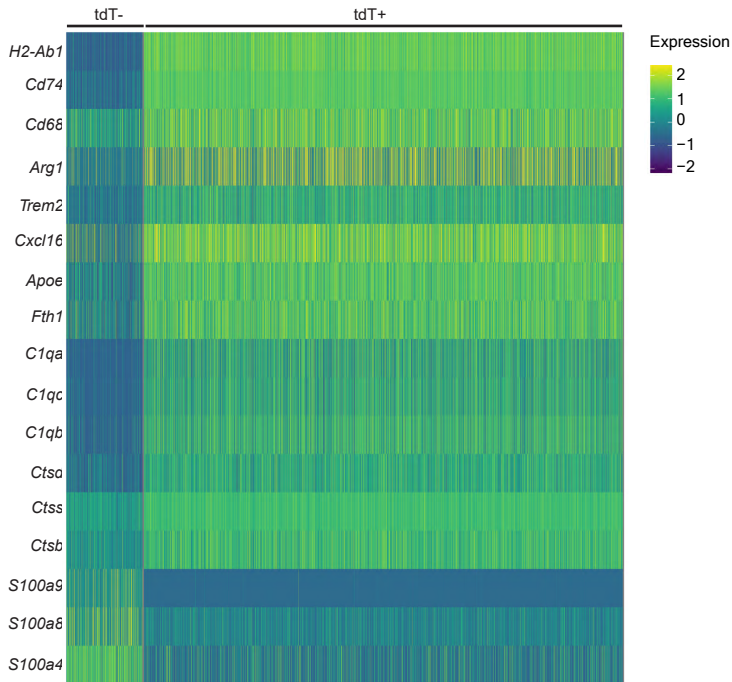

Supplement: supp [file elife_poa_e82938_Figure_9_figure_supplement_2.pdf › elife_poa_e82938_Figure_9_figure_supplement_2.pdf]
